# Supplementary material for: Concordance of chronic conditions among the household members in Shanghai: a cross-sectional study
Source: PubMed Central journal article supplement — BMJ Open. 2019 Dec 22;9(12):e031240. doi: 10.1136/bmjopen-2019-031240 (PMC6937075; doi:10.1136/bmjopen-2019-031240), 2019-12-22
Supplement: bmjopen-2019-031240.draft_revisions.pdf [file bmjopen-2019-031240.draft_revisions.pdf]

# BMJ Open

BMJ Open is committed to open peer review. As part of this commitment we make the peer review history of every article we publish publicly available.

When an article is published we post the peer reviewers' comments and the authors' responses online. We also post the versions of the paper that were used during peer review. These are the versions that the peer review comments apply to.

The versions of the paper that follow are the versions that were submitted during the peer review process. They are not the versions of record or the final published versions. They should not be cited or distributed as the published version of this manuscript.

BMJ Open is an open access journal and the full, final, typeset and author-corrected version of record of the manuscript is available on our site with no access controls, subscription charges or pay-per-view fees (<http://bmjopen.bmj.com>).

If you have any questions on BMJ Open's open peer review process please email [editorial.bmjopen@bmj.com](mailto:editorial.bmjopen@bmj.com)

# BMJ Open

## The concordance of chronic conditions among the household members in Shanghai: a cross-sectional study

|                               |                                                                                                                                                                                                                                                                                                                                                                                                                                               |
|-------------------------------|-----------------------------------------------------------------------------------------------------------------------------------------------------------------------------------------------------------------------------------------------------------------------------------------------------------------------------------------------------------------------------------------------------------------------------------------------|
| Journal:                      | <i>BMJ Open</i>                                                                                                                                                                                                                                                                                                                                                                                                                               |
| Manuscript ID                 | bmjopen-2019-031240                                                                                                                                                                                                                                                                                                                                                                                                                           |
| Article Type:                 | Research                                                                                                                                                                                                                                                                                                                                                                                                                                      |
| Date Submitted by the Author: | 07-May-2019                                                                                                                                                                                                                                                                                                                                                                                                                                   |
| Complete List of Authors:     | Qin, Yingyi; Second Military Medical University, Department of Health Statistics<br>Guo, Yibin; Second Military Medical University, Department of Health Statistics<br>Wu, cheng; Second Military Medical University, Department of Health Statistics<br>Zhang, Xinji; Second Military Medical University, Department of Health Statistics<br>He, Qian; Second Mil Med Univ, Department of Health Statistics<br>He, Jia; Second Mil Med Univ, |
| Keywords:                     | chronic conditions, household, concordance                                                                                                                                                                                                                                                                                                                                                                                                    |
|                               |                                                                                                                                                                                                                                                                                                                                                                                                                                               |

SCHOLARONE™  
Manuscripts

1  
2  
3  
4 **The concordance of chronic conditions among the household**  
5  
6 **members in Shanghai: a cross-sectional study**  
7

8 Yingyi Qin<sup>1†</sup>, Yibin Guo<sup>1†</sup>, Cheng Wu<sup>1</sup>, Xinji Zhang<sup>1</sup>, Qian He<sup>1</sup>, Jia He<sup>1\*</sup>  
9

10 No. 800 Xiangyin Road, Shanghai, China, 200092  
11

12 (1) Department of Health Statistics, Second Military Medical University, Shanghai,  
13  
14 China  
15

16 †Equal contributors  
17

18 \*Correspondence: Prof. Jia He, Department of Health Statistics, Second Military Medical  
19  
20 University, Shanghai, China, (e-mail: hejia63@yeah.net ;Tel: +86211871441).  
21

22 E-mail address:  
23

24 Yingyi Qin: yingyi\_qin@163.com

25 Yibin Guo: guoyibin@smmu.edu.cn

26 Cheng Wu: wucheng\_wu@126.com

27 Xinji Zhang: xinjizhang@yeah.net

28 Qian He: heqian2008@hotmail.com

29 Jia He: hejia63@yeah.net  
30  
31  
32  
33  
34  
35  
36  
37  
38  
39  
40  
41  
42  
43  
44  
45  
46  
47  
48  
49  
50  
51  
52  
53  
54  
55  
56  
57  
58  
59  
60

## Abstract

**Objectives:** Members living in the same household usually have some similar behaviors and stay in the same environment. We quantitatively assessed the associations of chronic conditions to investigate the concordance of disease status among the household members in Shanghai, China.

### Study Design:

A cross-sectional study.

### Setting:

Shanghai, China.

### Participants:

Our data was from the fifth Health Service Survey of Shanghai in 2013. 12,002 households with 31,531 residents were selected in this survey by using a three-stage, stratified, random sampling method.

### Main outcome measure:

We had chosen five chronic conditions with high prevalence in this survey: hypertension, diabetes, ischemic heart disease (IHD), cerebrovascular disease (CVD), and obesity. The generalized estimating equations (GEE) model was used to estimate the associations with adjustment for age, gender, education status, health insurance status, marriage status, smoking, and drinking. Except for all adult household members, we also explored the relationships among dyads of parents and children and spouses.

### Results:

A total of 10,198 households with 27,010 adult participants were included in our study. For all household members, we found that there were positive associations between one's chronic conditions and the same disease status of their household members (hypertension: odds ratio (OR) = 1.51, 95% confidence interval (CI) 1.38-1.64; diabetes: OR = 1.68, 95% CI 1.40-2.01; IHD: OR = 5.31, 95% CI 3.56-7.92; CVD: OR = 3.40,

1  
2  
3  
4 95% CI 1.99-5.80; obesity OR = 3.41, 95% CI 2.34-4.96). The similar associations  
5  
6 were also indicated by the results of parents-children and spouses subsets. Moreover,  
7  
8 the potential concordance of different chronic conditions was found in pair of  
9  
10 hypertension and diabetes.

### 11 12 **Conclusion:**

13  
14 Our findings indicated that there were positive associations between the chronic  
15  
16 condition status of the household members. This study provided the evidence about the  
17  
18 effect of co-residence factor in the prevalence of chronic conditions.  
19  
20  
21  
22  
23  
24  
25  
26  
27  
28  
29

### 30 **Strength & Limitations:**

- 31  
32 ● This is the first study to estimate the risk of chronic conditions when family  
33  
34 members has one or more chronic conditions in China.
- 35  
36 ● We performed a quantitative estimation of the association between one's chronic  
37  
38 condition status and their household members, including parents-children and  
39  
40 spouses.
- 41  
42 ● The definition and diagnosis of chronic condition for each participant was based  
43  
44 on self-reported records.
- 45  
46 ● This study was conducted in Shanghai and the results could not represent the  
47  
48 situation in other regions of China.
- 49  
50 ● Our study could not provide the estimation about the risk of new chronic condition  
51  
52 in health household members and find out some significant risk factors.  
53  
54  
55  
56  
57

58 **Key words:** chronic conditions; household; concordance  
59  
60

## Background

During the past three decades, China had experienced rapid social, economic and health services development<sup>1 2</sup>. The life expectancy have increased, lifestyles have changed, health care have become more accessible, and health insurance coverage have increased. For these remarkable growths, the burden of disease for country and residents have shifted from some infectious diseases to non-communicable chronic conditions<sup>2-4</sup>. Some researches had shown the prevalence of hypertension increased from 5.11% in 1959 to 17.65% in 2002, and the prevalence of type 2 diabetes mellitus increased from 1% in 1980 to 9.7% in 2008<sup>5-7</sup>. Non-communicable chronic conditions were also main burden of diseases for disability-adjusted life-years (DALYs), high systolic blood pressure, high fasting plasma glucose, and high body mass index were the 1<sup>st</sup>, 2<sup>nd</sup> and 4<sup>th</sup> ranked risk factor for globe DALYs in 2015, respectively. While, in 1990, the ranks of these three diseases were 3<sup>rd</sup>, 10<sup>th</sup> and 13<sup>th</sup>, respectively<sup>8</sup>. Shanghai is a typical city in China, which can well represent the direction of economic and healthy development in China. Noteworthily, the problem of aging in Shanghai is particularly serious. Moreover, this would bring about the new challenges of healthcare for our society and government<sup>9</sup>.

For the problem of chronic conditions, the improvement of healthcare and innovation of new effective medical treatment will be very important. Additionally, detecting the risk factors of chronic conditions incidence and finding out the high-risk population are also the effective way to control the prevalence of chronic conditions. To look for the risk factors, many researches had focus on the personal lifestyles which are associated with risk of chronic conditions, such as smoking, drinking, exercise, diet and so on<sup>10-13</sup>. Some genetic mechanisms are also considered as the risk factor of chronic conditions<sup>14 15</sup>. The household environment, which integrate the lifestyles, genetic mechanisms and environmental factors, would be an important study direction on

controlling the prevalence of chronic conditions<sup>16</sup>.

Based on the fifth Health Service Survey of Shanghai, which was the extension of China's National Health Service Survey (NHSS) in 2013, the prevalence rate was 27.24% for hypertension and 7.05% for diabetes among 29,269 people aged 15 or older. For hypertension, the results of survey indicate 6,096 households (50.79%) of 12,002 families had at least one person with hypertension, and 1,733 households (28.43%) of these 6,096 households had at least two persons with disease. This result had shown that there might be households clustering in prevalence of chronic conditions. To test and explore the hypothesis that whether one's chronic conditions are related to the others with chronic conditions living in the same household, we conducted the research and analyses based on the fifth Health Service Survey of Shanghai. We chose five chronic conditions with high prevalence: hypertension, diabetes, Ischemic heart disease (IHD), cerebrovascular disease (CVD), obesity. The chronic conditions associations would be detected among all household members, dyads of parents and children, and spouses, respectively.

## Methods

### Data source

The data for this study was from the fifth Health Service Survey of Shanghai in 2013. This survey was organized and conducted by the Shanghai Municipal Commission Health and Family Planning, and was the extension of NHSS. From 1993 to 2013, the NHSS has been conducted for five times (every five years), and is a cross-sectional survey study<sup>17</sup>. The sampling method and quality assurance measures used in Shanghai survey were consistent with the national sampling approach and principle<sup>18</sup>. The fifth Health Service Survey of Shanghai cover all of the 17 districts in Shanghai, and a three-stage, stratified, random sampling method was adopted. First stage, 100

1  
2  
3  
4 towns/townships were selected randomly from all these 17 districts. Second stage, one  
5  
6 thousand villages/communities were sampled randomly from these selected  
7  
8 towns/townships. Third stage, about 12,000 households were identified randomly.  
9

10 A face-to-face interview approach using structured household questionnaire, which was  
11  
12 developed by the National Commission Health and Family Planning of China, was  
13  
14 conducted for each household. The questionnaire contained the general information of  
15  
16 household, the demographic characteristics of residents, the relationship of household  
17  
18 members, self-reported illness and injury, outpatient and inpatient information.  
19

20  
21 To ensure the quality of this survey, some quality assurance measures were applied  
22  
23 during the process of data collection. Logic errors would be checked among the data by  
24  
25 survey constitutors. If there were logic errors, the investigators would contact the  
26  
27 household members and verify the relevant information. The accuracy of data  
28  
29 information were assessed by revisit-approach. The investigators revisited 5% of the  
30  
31 sampled households and collected ten key questions to check the consistency of the  
32  
33 information recorded. The consistency rate between these two visits was near to 99 %.  
34  
35 Additionally, the Myer's Blended index was 7.39, indicating that there was non-  
36  
37 existence of age preference in this survey<sup>19 20</sup>. Finally, this survey collected the  
38  
39 information of 12,002 households and 31,531 respondents. And in our study, we  
40  
41 included the households with at least two adults who aged 18 or older.  
42  
43  
44  
45  
46

#### 47 **Five chronic conditions**

48  
49 **Hypertension:** Hypertension for every resident was indicated based on the question in  
50  
51 the questionnaire "Have you ever been told by a doctor that you have hypertension".  
52  
53 The one who chose "YES" was considered to have hypertension.  
54

55  
56 **Diabetes:** Diabetes for every resident was indicated based on the question in the  
57  
58 questionnaire "Have you ever been told by a doctor that you have diabetes". The one  
59  
60



1  
2  
3  
4 who chose “YES” was considered to have diabetes.  
5

6 **IHD:** The questionnaire will record all of the chronic diseases for every resident, and  
7 these chronic diseases would be encoded in accordance with the disease coding list  
8 of the NHSS. IHD included angina pectoris (061), myocardial infarction (062), and  
9 other ischemic heart disease (063).  
10  
11  
12  
13

14 **CVD:** This chronic condition would be indicated according to the disease coding list  
15 of the NHSS: cerebrovascular disease (067).  
16  
17  
18

19 **Obesity:** Body mass index (BMI) would be calculated for every resident by height and  
20 weight. Obesity was indicated by the World Health Organization (WHO) International  
21 BMI categories (BMI  $\geq$  30 kg/m<sup>2</sup>)<sup>21</sup>.  
22  
23  
24  
25  
26  
27

## 28 **Covariates**

29  
30 Some socio-demographic characteristics would be included in our analyses as  
31 covariates. Age (continuously specified in years), education status (illiteracy/primary,  
32 secondary or college), health insurance status (yes or no), smoking (yes or no), drinking  
33 (yes or no). Except the analyses of spouse subset, gender (male or female) and marriage  
34 status (married, unmarried, divorced or widowed) was also included as a covariate.  
35  
36  
37  
38  
39  
40  
41  
42

## 43 **Statistical analyses**

44  
45 Before statistical analyses, we would identify whether each participant live in the  
46 household with the given chronic conditions. For example, if any other resident  
47 (excluding self) had the given chronic conditions, the indicator of household situation  
48 (excluding self) had the given chronic conditions, the indicator of household situation  
49 for he/she was “YES”. Then the generalized estimating equations (GEE) model with  
50 logit link would be used to find out the relationship between one’s chronic conditions  
51 and the others with chronic conditions living in the same household. The odds ratio  
52 (OR) and 95% confidence interval (CI) were estimated by GEE model to indicate the  
53  
54  
55  
56  
57  
58  
59  
60

1  
2  
3  
4 association between any chronic condition or each given chronic condition of individual  
5  
6 with the same condition of household member (e.g., the relationship between  
7  
8 hypertension and others household members with hypertension). And the association  
9  
10 of different chronic condition would also be assessed (e.g., the relationship between  
11  
12 hypertension and others household members with diabetes).

13  
14 We would estimate these associations in three different household scenes: all household  
15  
16 members, dyads of parents and children, and spouses. For the first scene, we included  
17  
18 all household members who aged 18 or older, and the definition of exposure was shown  
19  
20 at the beginning of this section. For the second scene, only adult children would be  
21  
22 included in analyses, and the chronic conditions of each of their parents were  
23  
24 considered as exposure. If the chronic conditions for their parents were not available,  
25  
26 this record should be excluded. And for the third scene, we defined the chronic  
27  
28 condition of wife as the outcome and the chronic condition of husband as the exposure.  
29  
30 The subgroup analyses would be conducted in the first scene according to two pre-  
31  
32 defined stratification factors: sex (male or female), education (illiteracy/primary,  
33  
34 secondary, and college).

35  
36 Adjusted models and unadjusted models were both used to estimate the relationship in  
37  
38 three household scenes. The adjusted models included age, gender, health insurance  
39  
40 status, education status, marriage status, drinking and smoking (gender and marriage  
41  
42 status were excluded in the third scene), and the final conclusion was based on the  
43  
44 results of the adjusted models. The results of unadjusted models would be obtained in  
45  
46 supplementary information. The choice of the working correlation matrix for GEE  
47  
48 model was based on the quasi-likelihood information criterion (QIC) index (select the  
49  
50 matrix with the smallest QIC index)<sup>22</sup>. We did not conducted any statistical model to  
51  
52 deal with the missing data because of low missing data rate. The observation with  
53  
54 missing data would be excluded from the final analyses. All data management and  
55  
56  
57  
58  
59  
60

1  
2  
3  
4 statistical analyses were performed using SAS software (version 9.4; SAS Institute Inc.,  
5 Cary, NC). All reported p values were two-sided and p value < 0.05 was regarded as  
6 statistically significant. This study is reported according to the Strengthening the  
7 Reporting of Observational studies in Epidemiology (STROBE) guidelines  
8 (supplementary S1), and all analyses were conducted on the basis of the statistical  
9 analysis plan (supplementary S2).

### 16 **Patient and public involvement**

17 This study is a cross-sectional questionnaire survey and no patient involved.  
18  
19  
20  
21  
22

### 23 **Results**

24 A total of 10,198 households (27,010 participants) with at least two adults who aged 18  
25 or older were included in our study from the data of the fifth Health Service Survey of  
26 Shanghai in 2013. For the second scene, there were 5,489 available records of dyads of  
27 parents and children, and 7,844 records of spouses had been analyzed in the third scene.  
28 The detail information was shown in flowchart (Fig. 1). Table 1 has shown the details  
29 of socio-demographic characteristics. The mean age of all included participants was  
30 52.63 years, and 31.34% (n=8,467) had at least one chronic condition. However, the  
31 children participants of parents-children subset were younger (36.01 years), and the  
32 prevalence rates of chronic conditions were much lower (the rate of chronic conditions  
33 was 11.89%).  
34  
35  
36  
37  
38  
39  
40  
41  
42  
43  
44  
45  
46

### 47 **All household members**

48 For the first scene, the results indicated that the chronic condition of participant was  
49 associated with the others with the same chronic condition living in the same household  
50 (the diagonal of Table 2): any chronic condition (OR =1.46, 95% CI: 1.34-1.58),  
51 hypertension (OR =1.51, 95% CI: 1.38-1.64), diabetes (OR = 1.68, 95% CI: 1.40-2.01),  
52 IHD (OR = 5.31, 95% CI: 3.56-7.92), CVD (OR = 3.40, 95% CI: 1.99-5.80), and  
53  
54  
55  
56  
57  
58  
59  
60

1  
2  
3  
4 obesity (OR = 3.41, 95% CI: 2.34-4.96). The results also revealed that there were  
5  
6 significantly positive associations for some different chronic conditions (diabetes and  
7  
8 hypertension, diabetes and obesity). The OR was 1.29 (95% CI: 1.17-1.42) for diabetes  
9  
10 to hypertension and 1.23 (95% CI: 1.11-1.36) for hypertension to diabetes. The OR was  
11  
12 1.45 (95% CI: 1.16-1.82) for diabetes to obesity and 1.36 (95% CI: 1.09-1.70) for  
13  
14 obesity to diabetes. More detail information was shown in Table 2, and the results of  
15  
16 unadjusted GEE models were listed in the Table S1.

17  
18  
19 In subgroup analysis, we found the similar association for the sex subgroups and  
20  
21 education level subgroups (Fig.2, Fig.3 and Table S2). However, the significant  
22  
23 relationship was not found in analyses of diabetes and IHD in subgroup of college  
24  
25 education.

### 26 27 28 **Dyads of parents and children**

29  
30 We did not conduct the analyses about IHD and CVD in this household scene for the  
31  
32 reason of low prevalence rate (0.2% for IHD, and 0.15% for CVD). Table 3 listed the  
33  
34 results of adjusted GEE models for dyads of parents and children. The positive  
35  
36 associations were observed in all of the same chronic condition pairs: any chronic  
37  
38 condition (OR = 5.13, 95% CI: 4.20-6.28), hypertension (OR = 6.29, 95% CI: 4.92-  
39  
40 8.05), diabetes (OR = 11.56, 95% CI: 7.88-16.98), and obesity (OR = 13.79, 95% CI:  
41  
42 8.50-22.38). For different chronic conditions, the children with diabetes and obesity  
43  
44 were associated with parents with hypertension (OR was 2.40 for diabetes, and OR was  
45  
46 1.69 for obesity). And the results also indicated that hypertension status of children was  
47  
48 associated with the diabetes status of their parents (OR = 1.61). The results of  
49  
50 unadjusted GEE models for the second household scene were listed in the Table S3.

### 51 52 53 **Spouses**

54  
55 The results of the spouses scene were shown in the Table 4. Agreeing with the results  
56  
57 shown in the above two scenes, the positive associations were also observed in the same  
58  
59  
60

1  
2  
3  
4 chronic condition pairs for spouses: any chronic condition (OR = 1.58, 95% CI: 1.41-  
5 1.77), hypertension (OR = 1.63, 95% CI: 1.45-1.84), diabetes (OR = 1.57, 95% CI:  
6 1.21-2.03), IHD (OR = 6.58, 95% CI: 3.78-11.43), CVD (OR = 3.62, 95% CI: 1.86-  
7 7.07), and obesity (OR = 5.10, 95% CI: 2.93-8.88). The wives with diabetes and IHD  
8 were associated with the hypertension status of their husbands (OR was 1.46 for  
9 diabetes, and OR was 1.60 for IHD). And the relationship between the hypertension  
10 status of wives and the diabetes status of husbands was also indicated (OR = 1.29). The  
11 information of unadjusted GEE models could be available in Table S4.  
12  
13  
14  
15  
16  
17  
18  
19  
20  
21  
22

## 23 Discussion

24  
25 In China, Shanghai has the heaviest burden of noncommunicable diseases, because it  
26 has the largest population and the largest ageing population<sup>23</sup>. Our study had conducted  
27 in-depth analyses about the association of five pre-selected chronic conditions status  
28 between the household members in Shanghai, China. Using the data of the fifth Health  
29 Service Survey, we found that the participants who live with the household members  
30 with chronic conditions were associated with 46% higher OR of having one or more  
31 chronic condition. For these five chronic conditions, the above relationship was  
32 observed in each same chronic condition. We also found the similar associations in  
33 dyads of parents and children scene and spouses scene. These results were consistent  
34 with some other research results<sup>16 24-26</sup>. Additionally, the results had revealed that there  
35 might be potential associations between the different chronic conditions, such as  
36 hypertension and diabetes.  
37  
38  
39  
40  
41  
42  
43  
44  
45  
46  
47  
48  
49  
50

51 We chose five chronic conditions (hypertension, diabetes, IHD, CVD, and obesity) as  
52 the target diseases of our study, because these five chronic conditions were the most  
53 prevalent in this health service survey. Based on the current knowledge, the incidence  
54 of the chronic conditions is the result of a combination of multiple factors. The main  
55  
56  
57  
58  
59  
60

1  
2  
3  
4 point of our study was to explore the effect of the co-residence factor on the prevalence  
5  
6 and incident of chronic conditions. The members of the same household would live in  
7  
8 the same environment, and might have the similar behaviors as well. In addition, some  
9  
10 of them would have genetic associations (such as patients and children, brothers and  
11  
12 sisters). Therefore, the co-residence factor could be considered as the combination of  
13  
14 multiple factors. Some researches had reported the association between the family  
15  
16 health history and risk of disease<sup>27-29</sup>. The co-residence factor could partially reflect the  
17  
18 family health history, but also represent some common environment and behavior  
19  
20 factors caused by living together. Our study indicated the positive associations between  
21  
22 the adults with chronic condition and the household members with the same condition.  
23  
24 According to the results of all household members, we found that the ORs for IHD and  
25  
26 CVD were large and the 95% CI of the corresponding ORs was wider. The reason for  
27  
28 such results might be that the prevalence rate of IHD and CVD were only 1.68% and  
29  
30 1.38%, respectively. And low prevalence rate would reduce the accuracy of statistical  
31  
32 model estimation. However, the results of both the adjusted GEE model and the crude  
33  
34 GEE model showed the positive associations for these two chronic conditions.  
35  
36  
37 In order to further explore the effect of co-residence factor on the chronic conditions,  
38  
39 we conducted analyses in two scenes. For dyads of parents and children, we considered  
40  
41 that there were significant genetic factors besides some environment and behavior  
42  
43 factors. And the effect of genetic factors would be excluded in the analyses of spouses.  
44  
45  
46 The positive associations, which were similar to the results of all household members,  
47  
48 were found in these two scenes, and the results were consistent with some previous  
49  
50 studies<sup>24-26 30 31</sup>. The results of analyses in these two special sub-population might show  
51  
52 the effect of genetic factors and mere co-residence factor without genetic ties in the  
53  
54 relationships that we were interested in. Moreover, the adjusted ORs in analyses about  
55  
56 dyads of parents and children were much larger (e.g. OR is 6.12 for hypertension  
57  
58  
59  
60

1  
2  
3  
4 association). However, we could make a simple conclusion that the effect of genetic  
5  
6 factors was much more important. Because some chronic conditions would be age-  
7  
8 related diseases and the prevalence rates of adult children in this health service survey  
9  
10 were low. For example, the prevalence rate of hypertension for adult children was only  
11  
12 8.86% (the mean of age was 39.16), and prevalence rate for those whose parents had  
13  
14 no hypertension was much lower (only 3.34%, the mean of age was 34.36). Based on  
15  
16 this consideration, we included the age covariate into the adjusted model. Therefore,  
17  
18 these results could reflect the associations of chronic condition status between children  
19  
20 and their parents though the ORs might be high.  
21  
22

23  
24 In addition to explore the association of the same chronic condition between  
25  
26 participants and their household members, the results of different chronic conditions  
27  
28 indicated that there might be positive associations between hypertension and diabetes.  
29  
30 This kind of association was consistent in all three scenes. The mechanisms and  
31  
32 pathways could not be concluded in our study, but several previous studies might  
33  
34 provide some hypotheses. The hypertension and diabetes are the syndromes of  
35  
36 metabolic syndrome (MetS). Some risk factors for MetS, such as lifestyle, diet, family  
37  
38 disease history, environment, might be the co-factors for the prevalence of hypertension  
39  
40 and diabetes<sup>32-34</sup>. However, the exact mechanisms should need further investigation.  
41  
42

43  
44 The main purpose of our study was to indicate the associations of chronic conditions  
45  
46 among the household members. Although we did not provide some specific risk factors  
47  
48 for the prevalence of chronic conditions, the quantitative assessment of the associations  
49  
50 had shown the effect of co-residence factor for the disease status among the household  
51  
52 members. According to our study, we suggested that the residents, whose household  
53  
54 members had some chronic conditions, should pay more attention to their health status.  
55  
56 Health education about chronic disease and change of some potential unhealthy  
57  
58 behaviors might reduce the prevalence rate of chronic conditions for these residents.  
59  
60

1  
2  
3  
4 Moreover, regular health examination (e.g. measurement of blood pressure and weight)  
5  
6 would be helpful for residents to monitor their own health status. Shanghai as the  
7  
8 biggest and most developed city in China lends the development trend. Some  
9  
10 investigators had indicated that Shanghai Chronic Disease Self-Management Program  
11  
12 (CDSMP), which is the most widely accepted self-management patient education  
13  
14 programme worldwide, could improved participants' health behaviour, self-efficacy,  
15  
16 and health status<sup>23</sup>. Maybe this program could be modified and acceptable to the health  
17  
18 residents whose household members have chronic conditions. Moreover, the similar  
19  
20 phenomenon that concordance of chronic conditions among the household members  
21  
22 would be also paid attention to in other regions of China, and the relevant solution  
23  
24 should be found out advanced. These would be beneficial for controlling the prevalence  
25  
26 rate of chronic conditions and reducing the disease burden for country and residents.  
27  
28 Our study had several potential limitations. First, the definition and diagnosis of chronic  
29  
30 condition for each participant was based on self-reported records. There might be the  
31  
32 potential risk of underreporting and misreporting. However, this survey was part of the  
33  
34 NHSS and every investigator had undergone rigorous and formal training. Previous  
35  
36 researchers have shown the agreement between biomedical and self-reported  
37  
38 measurements of some chronic conditions in a Chinese national community sample<sup>35</sup>.  
39  
40 Therefore, the records of these five chronic conditions would be reliable. Second, this  
41  
42 study was conducted in Shanghai and the results could not represent the situation in  
43  
44 other regions of China. Nevertheless, it could cause people and health management  
45  
46 department to pay attention to this problem. Third, our study could not provide the  
47  
48 estimation about the risk of new chronic condition in health household members and  
49  
50 find out some significant risk factors. We only indicated the phenomenon that there  
51  
52 were associations for the prevalence of chronic conditions in the household level. These  
53  
54 results suggested that we'd better pay attention to the health status of the health  
55  
56  
57  
58  
59  
60



1  
2  
3  
4 residents in the households with members with chronic conditions. Fourth, this study is  
5  
6 a cross-sectional survey study, and several potential bias, such as recall bias,  
7  
8 confounding bias and reporting bias, might not be completely avoided. For the  
9  
10 confounding bias, we conducted the analyses by the adjusted GEE models with some  
11  
12 socio-demographic covariates.  
13  
14  
15  
16

## 17 **Conclusions**

18  
19 In conclusion, our study had indicated one's chronic condition status was associated  
20  
21 with the status of their household members in the Shanghai, China. The results of  
22  
23 parents-children and spouses subsets were consisted with the analyses of all household  
24  
25 members. Additionally, analyses about different chronic conditions showed that there  
26  
27 might be positive associations between hypertension and diabetes. The mechanisms  
28  
29 about these associations should be investigated by further research. However, the  
30  
31 evidence about the effect of co-residence factor in some chronic conditions would  
32  
33 suggest that people should pay more attention to their health status, especially those  
34  
35 whose household members have chronic conditions. That might reduce the prevalence  
36  
37 and increase the early detection rate about some chronic conditions.  
38  
39  
40  
41  
42

## 43 **List of abbreviations**

44  
45 IHD = ischemic heart disease  
46

47 CVD = cerebrovascular disease  
48

49 GEE = generalized estimating equations  
50

51 OR = odds ratio  
52

53 CI = confidence interval  
54

55 DALYs = disability-adjusted life-years  
56

57 NHSS = National Health Service Survey  
58  
59  
60

1  
2  
3  
4 BMI = body mass index

5  
6 WHO = World Health Organization

7  
8 QIC = quasi-likelihood information criterion

9  
10 STROBE = Strengthening the Reporting of Observational studies in Epidemiology

11  
12 MetS = metabolic syndrome

13  
14 CDSMP = Chronic Disease Self-Management Program

## 15 16 17 18 19 **Declarations**

### 20 21 **Ethics approval and consent to participate**

22  
23 This cross-sectional questionnaire survey was organized by the Shanghai Municipal  
24 Commission Health and Family Planning. As we knew, this survey didn't contain any  
25 treatment, blood drawing or others intervention which might influence the health of  
26 participators. Informed consent was obtained by surveyors prior to data collection and  
27 personal information was with strict conservation during our analysis process. Thus no  
28 ethical approval is required for our study.  
29

### 30 31 32 33 34 35 **Consent for publication**

36  
37 We give my consent for information about myself/my child or ward/my relative (circle  
38 as appropriate) to be published in *BMC Public Health*.  
39

### 40 41 42 43 44 **Availability of data and materials**

45  
46 The datasets used and/or analysed during the current study are available from the  
47 corresponding author on reasonable request.  
48

### 49 50 51 52 **Competing of interest**

53  
54 The authors declare that they have no competing interests.

### 55 56 57 58 59 **Funding**

60  
This study was conducted under a grant from the Fourth Round of Shanghai Three-year  
Action Plan on Public Health Discipline and Talent Program: Evidence-based Public

1  
2  
3  
4 Health and Health Economics(No. 15GWZK0901).  
5

### 6 **Authors' contribution**

7  
8 Dr. Yingyi Qing ,Dr. Yibin Guo and Prof. Jia He designed this study. Dr. Yingyi Qin,  
9  
10 Dr. Yibin Guo and Prof. Cheng Wu analyzed the data. Prof. Qian He and Dr. Xinji  
11  
12 Zhang checked the statistical analysis. Dr. Yibin Guo and Dr. Yingyi Qin wrote the  
13  
14 manuscript. Prof. Jia He revised this manuscript.  
15  
16

### 17 **Acknowledge**

18  
19 We appreciate the Shanghai Municipal Commission Health and Family Planning for  
20  
21 their assistance in designing this study. We also thank the participates and data  
22  
23 managers who gave their time and effort to participate in the fifth Health Service Survey  
24  
25 of Shanghai.  
26  
27  
28  
29  
30  
31  
32  
33

### 34 **Key points:**

- 35  
36 ● Little study was studied on the topic of concordance of chronic conditions among  
37  
38 the household.
- 39  
40 ● This is the first study to estimate the risk of chronic conditions when family  
41  
42 members has one or more chronic conditions in China.
- 43  
44 ● We performed a quantitative estimation of the assoication between one's chronic  
45  
46 condition status and their household members, including parents-children and  
47  
48 spouses.
- 49  
50 ● We suggested that the residents, whose household members had some chronic  
51  
52 conditions, should pay more attention to their health status.  
53  
54  
55  
56

### 57 **References**

58  
59  
60

- 1  
2  
3  
4 1. Meng Q, Xu L, Zhang Y, et al. Trends in access to health services and financial protection in  
5  
6 China between 2003 and 2011: a cross-sectional study. *Lancet* 2012;379(9818):805-  
7  
8  
9 14. doi: 10.1016/S0140-6736(12)60278-5  
10
- 11  
12 2. Zhou M, Wang H, Zhu J, et al. Cause-specific mortality for 240 causes in China during 1990-  
13  
14 2013: a systematic subnational analysis for the Global Burden of Disease Study 2013.  
15  
16 *Lancet* 2016;387(10015):251-72. doi: 10.1016/S0140-6736(15)00551-6  
17  
18
- 19  
20 3. Milner J, Wilkinson P. Trends in cause-specific mortality in Chinese provinces. *Lancet*  
21  
22 2016;387(10015):204-5. doi: 10.1016/S0140-6736(15)00553-X  
23  
24
- 25  
26 4. Access GBDH, Quality Collaborators. Electronic address cue, Access GBDH, et al.  
27  
28 Healthcare Access and Quality Index based on mortality from causes amenable to  
29  
30 personal health care in 195 countries and territories, 1990-2015: a novel analysis from  
31  
32 the Global Burden of Disease Study 2015. *Lancet* 2017;390(10091):231-66. doi:  
33  
34 10.1016/S0140-6736(17)30818-8  
35  
36
- 37  
38 5. Ruan Y, Mo M, Joss-Moore L, et al. Increased waist circumference and prevalence of type  
39  
40 2 diabetes and hypertension in Chinese adults: two population-based cross-sectional  
41  
42 surveys in Shanghai, China. *BMJ open* 2013;3(10):e003408. doi: 10.1136/bmjopen-  
43  
44 2013-003408  
45  
46
- 47  
48 6. Wu Y, Huxley R, Li L, et al. Prevalence, awareness, treatment, and control of hypertension  
49  
50 in China: data from the China National Nutrition and Health Survey 2002. *Circulation*  
51  
52 2008;118(25):2679-86. doi: 10.1161/CIRCULATIONAHA.108.788166  
53  
54
- 55  
56 7. Yang W, Lu J, Weng J, et al. Prevalence of diabetes among men and women in China. *The*  
57  
58 *New England journal of medicine* 2010;362(12):1090-101. doi:  
59  
60

- 1  
2  
3  
4 10.1056/NEJMoa0908292  
5  
6  
7 8. Cohen AJ, Brauer M, Burnett R, et al. Estimates and 25-year trends of the global burden of  
8  
9 disease attributable to ambient air pollution: an analysis of data from the Global Burden  
10  
11 of Diseases Study 2015. *Lancet* 2017;389(10082):1907-18. doi: 10.1016/S0140-  
12  
13 6736(17)30505-6  
14  
15  
16  
17 9. Fang EF, Scheibye-Knudsen M, Jahn HJ, et al. A research agenda for aging in China in the  
18  
19 21st century. *Ageing research reviews* 2015;24(Pt B):197-205. doi:  
20  
21 10.1016/j.arr.2015.08.003  
22  
23  
24  
25 10. Orozco LJ, Buchleitner AM, Gimenez-Perez G, et al. Exercise or exercise and diet for  
26  
27 preventing type 2 diabetes mellitus. *The Cochrane database of systematic reviews*  
28  
29 2008(3):CD003054. doi: 10.1002/14651858.CD003054.pub3  
30  
31  
32  
33 11. Yu R, Yan LL, Wang H, et al. Effectiveness of a community-based individualized lifestyle  
34  
35 intervention among older adults with diabetes and hypertension, Tianjin, China, 2008-  
36  
37 2009. *Preventing chronic disease* 2014;11:E84. doi: 10.5888/pcd11.120333  
38  
39  
40  
41 12. Pan A, Wang Y, Talaei M, et al. Relation of active, passive, and quitting smoking with  
42  
43 incident type 2 diabetes: a systematic review and meta-analysis. *The lancet Diabetes*  
44  
45 *& endocrinology* 2015;3(12):958-67. doi: 10.1016/S2213-8587(15)00316-2  
46  
47  
48  
49 13. Knott C, Bell S, Britton A. Alcohol Consumption and the Risk of Type 2 Diabetes: A  
50  
51 Systematic Review and Dose-Response Meta-analysis of More Than 1.9 Million  
52  
53 Individuals From 38 Observational Studies. *Diabetes care* 2015;38(9):1804-12. doi:  
54  
55 10.2337/dc15-0710  
56  
57  
58  
59 14. Zhang C, Wang L, Liao Q, et al. Genetic associations with hypertension: meta-analyses of  
60

- 1  
2  
3  
4 six candidate genetic variants. *Genetic testing and molecular biomarkers*  
5  
6 2013;17(10):736-42. doi: 10.1089/gtmb.2013.0080  
7  
8  
9 15. Replication DIG, Meta-analysis C, Asian Genetic Epidemiology Network Type 2 Diabetes  
10  
11 C, et al. Genome-wide trans-ancestry meta-analysis provides insight into the genetic  
12  
13 architecture of type 2 diabetes susceptibility. *Nature genetics* 2014;46(3):234-44. doi:  
14  
15 10.1038/ng.2897  
16  
17  
18 16. Patel SA, Dhillon PK, Kondal D, et al. Chronic disease concordance within Indian  
19  
20 households: A cross-sectional study. *PLoS medicine* 2017;14(9):e1002395. doi:  
21  
22 10.1371/journal.pmed.1002395  
23  
24  
25 17. Yuefeng L, Keqin R, Xiaowei R. Use of and factors associated with self-treatment in China.  
26  
27 *BMC public health* 2012;12:995. doi: 10.1186/1471-2458-12-995  
28  
29  
30 18. Xu Y, Gao J, Zhou Z, et al. Measurement and explanation of socioeconomic inequality in  
31  
32 catastrophic health care expenditure: evidence from the rural areas of Shaanxi  
33  
34 Province. *BMC health services research* 2015;15:256. doi: 10.1186/s12913-015-0892-  
35  
36 2  
37  
38  
39 19. Zhang X, Zhang Y, Xiao X, et al. The relation between health insurance and management  
40  
41 of hypertension in Shanghai, China: a cross-sectional study. *BMC public health*  
42  
43 2016;16:959. doi: 10.1186/s12889-016-3627-3  
44  
45  
46  
47 20. Bello Y. Error Detection in Outpatients' Age Data Using Demographic Techniques. *Int J*  
48  
49 *Pure Appl Sci Technol* 2012;10:27-36  
50  
51  
52  
53  
54  
55 21. Obesity: preventing and managing the global epidemic. Report of a WHO consultation.  
56  
57 *World Health Organization technical report series* 2000;894:i-xii, 1-253.  
58  
59  
60

- 1  
2  
3  
4 22. Pan W. Akaike's information criterion in generalized estimating equations. *Biometrics*  
5  
6 2001;57(1):120-5.  
7  
8  
9 23. Fu D, Fu H, McGowan P, et al. Implementation and quantitative evaluation of chronic  
10  
11 disease self-management programme in Shanghai, China: randomized controlled trial.  
12  
13 *Bulletin of the World Health Organization* 2003;81(3):174-82.  
14  
15  
16 24. Lee MH, Kim HC, Thomas GN, et al. Familial concordance of metabolic syndrome in Korean  
17  
18 population--Korean National Health and Nutrition Examination Survey 2005. *Diabetes*  
19  
20 *research and clinical practice* 2011;93(3):430-6. doi: 10.1016/j.diabres.2011.06.002  
21  
22  
23 25. Okuda T, Miyazaki T, Sakuragi S, et al. Significant but weak spousal concordance of  
24  
25 metabolic syndrome components in Japanese couples. *Environmental health and*  
26  
27 *preventive medicine* 2014;19(2):108-16. doi: 10.1007/s12199-013-0361-7  
28  
29  
30 26. Sun J, Lu J, Wang W, et al. Prevalence of Diabetes and Cardiometabolic Disorders in  
31  
32 Spouses of Diabetic Individuals. *American journal of epidemiology* 2016;184(5):400-9.  
33  
34  
35  
36  
37  
38  
39  
40  
41 27. Baptiste-Roberts K, Gary TL, Beckles GL, et al. Family history of diabetes, awareness of  
42  
43 risk factors, and health behaviors among African Americans. *American journal of public*  
44  
45 *health* 2007;97(5):907-12. doi: 10.2105/AJPH.2005.077032  
46  
47  
48 28. Carroll JC, Campbell-Scherer D, Permaul JA, et al. Assessing family history of chronic  
49  
50 disease in primary care: Prevalence, documentation, and appropriate screening.  
51  
52 *Canadian family physician Medecin de famille canadien* 2017;63(1):e58-e67.  
53  
54  
55 29. Welch BM, Dere W, Schiffman JD. Family health history: the case for better tools. *Jama*  
56  
57  
58 2015;313(17):1711-2. doi: 10.1001/jama.2015.2417  
59  
60

- 1  
2  
3  
4 30. Park HS, Park JY, Cho SI. Familial aggregation of the metabolic syndrome in Korean  
5  
6 families with adolescents. *Atherosclerosis* 2006;186(1):215-21. doi:  
7  
8 10.1016/j.atherosclerosis.2005.07.019  
9  
10  
11 31. Di Castelnuovo A, Quacquarello G, Donati MB, et al. Spousal concordance for major  
12  
13 coronary risk factors: a systematic review and meta-analysis. *American journal of*  
14  
15 *epidemiology* 2009;169(1):1-8. doi: 10.1093/aje/kwn234  
16  
17  
18 32. Wilson PW, D'Agostino RB, Parise H, et al. Metabolic syndrome as a precursor of  
19  
20 cardiovascular disease and type 2 diabetes mellitus. *Circulation* 2005;112(20):3066-72.  
21  
22 doi: 10.1161/CIRCULATIONAHA.105.539528  
23  
24  
25 33. Buscemi S, Sprini D, Grosso G, et al. Impact of lifestyle on metabolic syndrome in  
26  
27 apparently healthy people. *Eating and weight disorders : EWD* 2014;19(2):225-32. doi:  
28  
29 10.1007/s40519-014-0117-4  
30  
31  
32 34. Kim MJ, Lim NK, Choi SJ, et al. Hypertension is an independent risk factor for type 2  
33  
34 diabetes: the Korean genome and epidemiology study. *Hypertension research : official*  
35  
36 *journal of the Japanese Society of Hypertension* 2015;38(11):783-9. doi:  
37  
38 10.1038/hr.2015.72  
39  
40  
41 35. Meng N, Zhang Q, Yang M. Comparison of self-reported and biomedical data on  
42  
43 hypertension and diabetes: findings from the China Health and Retirement Longitudinal  
44  
45 Study (CHARLS). *BMJ open* 2016;6(1):e009836.  
46  
47  
48  
49  
50  
51  
52  
53  
54  
55  
56  
57

## Figure legends

58 Figure 1 The flow chart of participates selection of the three scenes analysis  
59  
60



1  
2  
3  
4 Figure 2 The forest plot of five chronic conditions subgroup analysis categorized by  
5 gender. The plot showed the adjusted odds ratios and 95% confidence interval of the  
6 association between each given chronic condition of individual with the same condition  
7 of household member.  
8  
9  
10  
11

12 Figure 3 The forest plot of five chronic conditions subgroup analysis categorized by  
13 education status. The plot showed the adjusted odds ratios and 95% confidence interval  
14 of the association between each given chronic condition of individual with the same  
15 condition of household member.  
16  
17  
18  
19  
20  
21  
22  
23  
24  
25  
26  
27  
28  
29  
30  
31  
32  
33  
34  
35  
36  
37  
38  
39  
40  
41  
42  
43  
44  
45  
46  
47  
48  
49  
50  
51  
52  
53  
54  
55  
56  
57  
58  
59  
60

Table 1 Socio-demographic characteristics of participants

| Characteristic                               | All household |                       |                    |
|----------------------------------------------|---------------|-----------------------|--------------------|
|                                              | members       | Children <sup>a</sup> | Wives <sup>b</sup> |
| <b>No. of households</b>                     | 10,198        | 4,865                 | 7,211              |
| <b>No. of participates</b>                   | 27,014        | 5,493                 | 7,845              |
| <b>Age, years, mean (SD)</b>                 | 52.63(17.06)  | 36.01(12.18)          | 54.01(13.85)       |
| <b>Male, n (%)</b>                           | 13,182(48.8)  | 3,273(59.58)          | -                  |
| <b>Education status, n (%)<sup>c,e</sup></b> |               |                       |                    |
| Illiteracy/Primary                           | 5,801(21.47)  | 334(6.08)             | 2,191(27.93)       |
| Secondary                                    | 14,484(53.62) | 2,481(45.17)          | 4,551(58.01)       |
| Collage                                      | 6,727(24.9)   | 2,678(48.75)          | 1,102(14.05)       |
| <b>Marriage status, n (%)<sup>f</sup></b>    |               |                       |                    |
| Unmarried                                    | 3,124(11.56)  | 2,286(41.62)          | -                  |
| Married                                      | 22,116(81.87) | 2,924(53.23)          | -                  |
| Divorced or widowed                          | 1,772(6.56)   | 283(5.15)             | -                  |
| <b>Insurance, n (%)</b>                      | 26,011(96.29) | 5,247(95.52)          | 7,575(96.56)       |
| <b>Drinking, n (%)</b>                       | 5,157(19.09)  | 944(17.19)            | 222(2.83)          |
| <b>Smoking, n (%)</b>                        | 6,392(23.66)  | 1,460(26.58)          | 166(2.12)          |
| <b>Chronic conditions, n (%)</b>             |               |                       |                    |
| Any chronic conditions <sup>d</sup>          | 8,467(31.34)  | 653(11.89)            | 2,414(30.77)       |
| Hypertension                                 | 7,245(26.82)  | 480(8.74)             | 2,102(26.79)       |
| Diabetes                                     | 1,875(6.94)   | 110(2)                | 498(6.35)          |
| IHD                                          | 455(1.68)     | 11(0.2)               | 117(1.49)          |
| CVD                                          | 372(1.38)     | 8(0.15)               | 106(1.35)          |
| Obesity                                      | 631(2.34)     | 128(2.33)             | 156(1.99)          |

Notes:

a The characteristics of children in parents-children subset.

b The characteristics of wives in spouses subset.

c “Illiteracy/Primary” in education status means the education years were from 0 to 5 years, “secondary” means the education years were from 6 to 12 years, and “collage” means the education years of residents were higher than 12 years including undergraduate and graduate degrees.

d The participants had at least one chronic condition.

IHD: Ischemic Heart Disease; CVD: Cerebrovascular Disease.

e There were 2 participates missing in education status in data set.

f There were 2 participates missing in marriage status in data set.

Table 2 The adjusted associations between one’s chronic conditions and the disease status of their own household members - Scene 1 (N = 27,010)

| Exposure:                                                | Any chronic conditions |         | Hypertension        |         | Diabetes            |         | IHD                 |         | CVD                 |         | Obesity             |         |
|----------------------------------------------------------|------------------------|---------|---------------------|---------|---------------------|---------|---------------------|---------|---------------------|---------|---------------------|---------|
| Chronic condition status of any other household members. | OR (95% CI)            | P       | OR (95% CI)         | P       | OR (95% CI)         | P       | OR (95% CI)         | P       | OR (95% CI)         | P       | OR (95% CI)         | P       |
| Any chronic conditions                                   | 1.46<br>(1.34-1.58)    | <0.0001 | 1.46<br>(1.34-1.58) | <0.0001 | 1.30<br>(1.17-1.45) | <0.0001 | 1.23<br>(1.00-1.51) | 0.0467  | 1.01<br>(0.81-1.26) | 0.9269  | 1.29<br>(1.09-1.53) | 0.0034  |
| Hypertension                                             | 1.45<br>(1.34-1.57)    | <0.0001 | 1.51<br>(1.38-1.64) | <0.0001 | 1.23<br>(1.11-1.36) | <0.0001 | 1.18<br>(0.97-1.45) | 0.0951  | 0.87<br>(0.70-1.08) | 0.1930  | 1.09<br>(0.93-1.29) | 0.2846  |
| Diabetes                                                 | 1.38<br>(1.25-1.52)    | <0.0001 | 1.29<br>(1.17-1.42) | <0.0001 | 1.68<br>(1.40-2.01) | <0.0001 | 1.06<br>(0.79-1.42) | 0.6846  | 1.10<br>(0.80-1.50) | 0.5632  | 1.45<br>(1.16-1.82) | 0.0012  |
| IHD                                                      | 1.08<br>(0.90-1.30)    | 0.3911  | 1.07<br>(0.88-1.29) | 0.5015  | 1.00<br>(0.75-1.33) | 0.9949  | 5.31<br>(3.56-7.92) | <0.0001 | 1.46<br>(0.90-2.35) | 0.1224  | 0.90<br>(0.54-1.50) | 0.6846  |
| CVD                                                      | 0.95<br>(0.77-1.16)    | 0.5856  | 0.81<br>(0.66-1.00) | 0.0526  | 1.03<br>(0.76-1.40) | 0.8473  | 1.51<br>(0.93-2.43) | 0.0951  | 3.40<br>(1.99-5.80) | <0.0001 | 0.60<br>(0.31-1.15) | 0.1251  |
| Obesity                                                  | 1.40<br>(1.18-1.66)    | 0.0001  | 1.14<br>(0.97-1.35) | 0.1002  | 1.36<br>(1.09-1.70) | 0.0076  | 0.86<br>(0.51-1.45) | 0.5663  | 0.58<br>(0.29-1.15) | 0.1172  | 3.41<br>(2.34-4.96) | <0.0001 |

Note:  
 The chronic conditions on the top of table represented the status of participants. The chronic conditions on the left of the table represented the status of any other household members. The generalized estimating equations (GEE) model was adjusted for age, gender, health insurance status, education status, marriage status, drinking and smoking.

Table 3 The adjusted associations of chronic conditions between children and their own parents - Scene 2 (N = 5,489 dyads)

| Exposure:                           | Any chronic conditions |        | Hypertension    |        | Diabetes          |        | Obesity           |        |
|-------------------------------------|------------------------|--------|-----------------|--------|-------------------|--------|-------------------|--------|
| chronic condition status of parents | OR (95% CI)            | P      | OR (95% CI)     | P      | OR (95% CI)       | P      | OR (95% CI)       | P      |
| Any chronic conditions              | 5.13(4.20-6.28)        | <.0001 | 5.59(4.35-7.18) | <.0001 | 4.66(2.90-7.48)   | <.0001 | 3.02(2.07-4.42)   | <.0001 |
| Hypertension                        | 3.93(3.25-4.75)        | <.0001 | 6.29(4.92-8.05) | <.0001 | 2.40(1.61-3.57)   | <.0001 | 1.69(1.17-2.44)   | 0.0056 |
| Diabetes                            | 2.17(1.67-2.83)        | <.0001 | 1.61(1.16-2.25) | 0.0047 | 11.56(7.88-16.98) | <.0001 | 1.51(0.88-2.57)   | 0.1346 |
| Obesity                             | 5.23(3.24-8.45)        | <.0001 | 1.00(0.45-2.21) | 0.9951 | 2.47(0.95-6.42)   | 0.0639 | 13.79(8.50-22.38) | <.0001 |

Note:

The chronic conditions on the top of table represented the status of children. The chronic conditions on the left of the table represented the status of their parents. The analyses of IHD and CVD were not conducted because of low prevalence rate in this subset. The generalized estimating equations (GEE) model was adjusted for age, gender, health insurance status, education status, marriage status, drinking and smoking.

Table 4 The adjusted associations of chronic conditions between wife and their own husband - Scene 3 (N = 7,844 spouses)

| Exposure:<br>chronic condition status of any<br>other household members. | Any chronic conditions |        | Hypertension        |        | Diabetes            |        | IHD                  |        | CVD                 |        | Obesity             |        |
|--------------------------------------------------------------------------|------------------------|--------|---------------------|--------|---------------------|--------|----------------------|--------|---------------------|--------|---------------------|--------|
|                                                                          | OR (95% CI)            | P      | OR (95% CI)         | P      | OR (95% CI)         | P      | OR (95% CI)          | P      | OR (95% CI)         | P      | OR (95% CI)         | P      |
| Any chronic conditions                                                   | 1.58<br>(1.41-1.77)    | <.0001 | 1.55<br>(1.38-1.74) | <.0001 | 1.48<br>(1.22-1.80) | <.0001 | 1.64<br>(1.09-2.46)  | 0.0166 | 0.84<br>(0.56-1.26) | 0.3992 | 1.35<br>(0.96-1.90) | 0.0892 |
| Hypertension                                                             | 1.59<br>(1.42-1.79)    | <.0001 | 1.63<br>(1.45-1.84) | <.0001 | 1.46<br>(1.20-1.77) | 0.0001 | 1.60<br>(1.08-2.37)  | 0.0182 | 0.76<br>(0.51-1.14) | 0.1783 | 1.11<br>(0.79-1.56) | 0.5353 |
| Diabetes                                                                 | 1.35<br>(1.13-1.63)    | 0.0011 | 1.29<br>(1.07-1.55) | 0.0069 | 1.57<br>(1.21-2.03) | 0.0007 | 1.48<br>(0.90-2.44)  | 0.1197 | 0.57<br>(0.27-1.21) | 0.1427 | 1.02<br>(0.59-1.77) | 0.9357 |
| IHD                                                                      | 1.06<br>(0.72-1.55)    | 0.7695 | 0.96<br>(0.65-1.42) | 0.8379 | 1.22<br>(0.71-2.09) | 0.4762 | 6.58<br>(3.78-11.43) | <.0001 | 1.68<br>(0.76-3.69) | 0.1994 | 1.17<br>(0.42-3.25) | 0.7684 |
| CVD                                                                      | 1.10<br>(0.72-1.67)    | 0.6596 | 0.80<br>(0.52-1.23) | 0.3101 | 0.99<br>(0.54-1.82) | 0.9847 | 1.36<br>(0.53-3.48)  | 0.5263 | 3.62<br>(1.86-7.07) | 0.0002 | 1.28<br>(0.46-3.54) | 0.6403 |
| Obesity                                                                  | 1.29<br>(0.90-1.85)    | 0.1670 | 0.87<br>(0.59-1.29) | 0.4888 | 1.69<br>(0.99-2.88) | 0.0553 | 1.03<br>(0.27-3.96)  | 0.9700 | 0.58<br>(0.08-4.31) | 0.5953 | 5.10<br>(2.93-8.88) | <.0001 |

## Note:

The chronic conditions on the top of table represented the status of wives. The chronic conditions on the left of the table represented the status of their husband. The generalized estimating equations (GEE) model was adjusted for age, health insurance status, education status, drinking and smoking.

1  
2  
3  
4  
5  
6  
7  
8  
9  
10  
11  
12  
13  
14  
15  
16  
17  
18  
19  
20  
21  
22  
23  
24  
25  
26  
27  
28  
29  
30  
31  
32  
33  
34  
35  
36  
37  
38  
39  
40  
41  
42  
43  
44  
45  
46

For peer review only

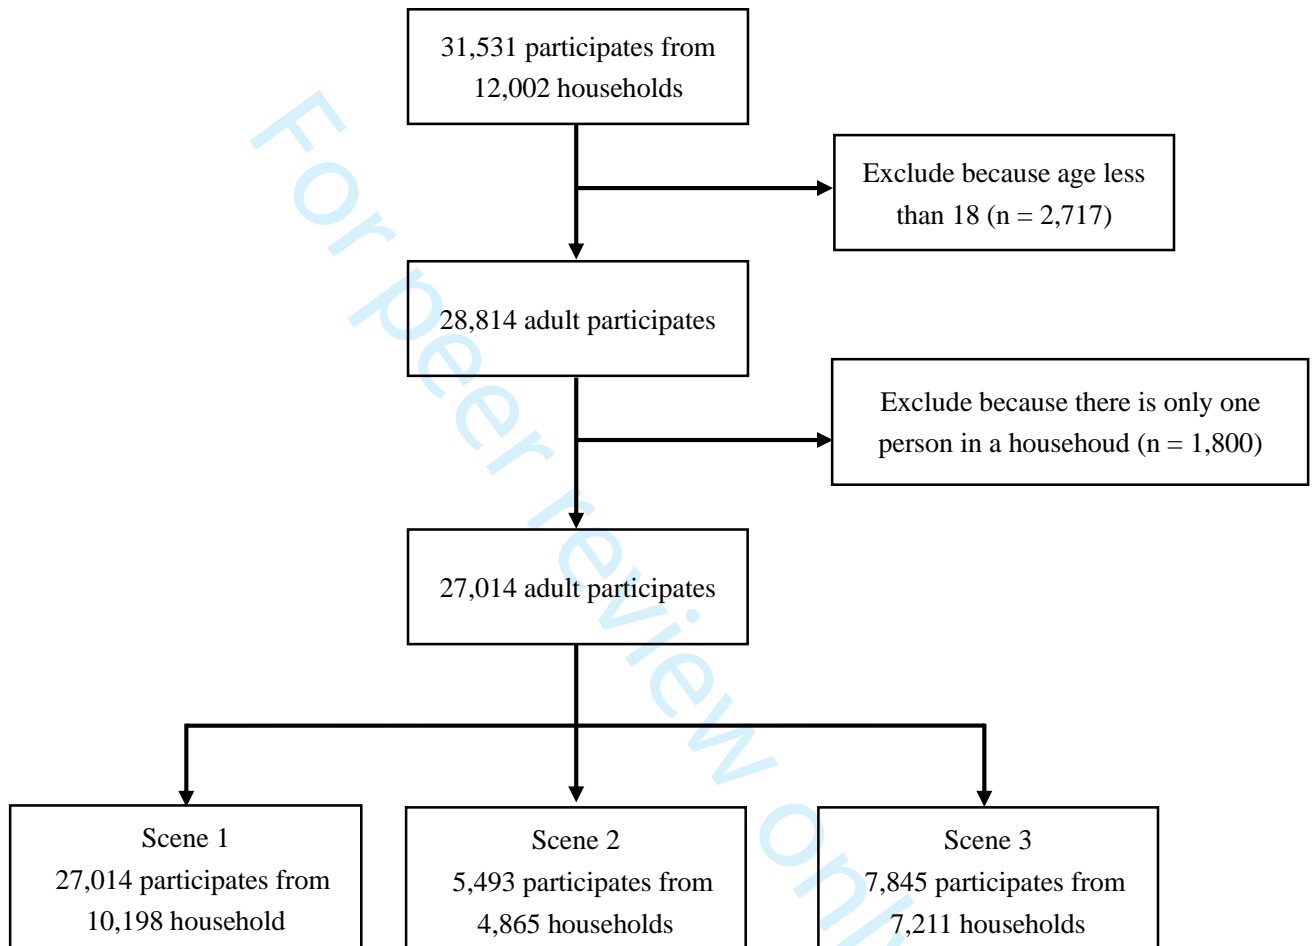

Notes: There were 4 participates missing in education status or marriage status in scene 1. There were 4 participates missing in education status or marriage status in scene 2. There was 1 participate missing in education status or marriage status in scene 3.

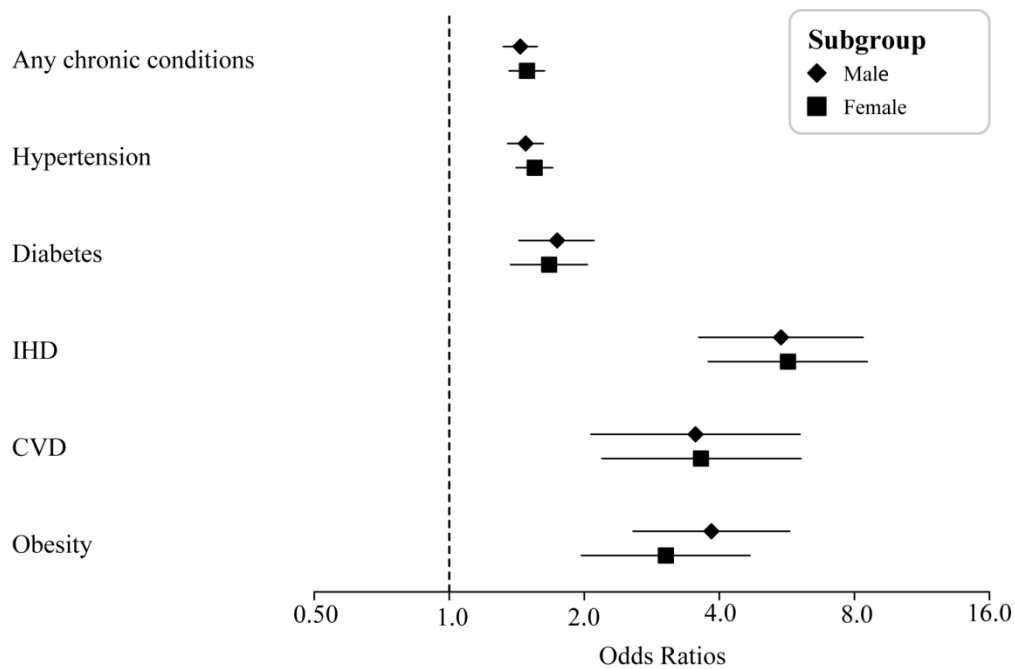

Figure 2 The forest plot of five chronic conditions subgroup analysis categorized by gender. The plot showed the adjusted odds ratios and 95% confidence interval of the association between each given chronic condition of individual with the same condition of household member.

163x108mm (300 x 300 DPI)



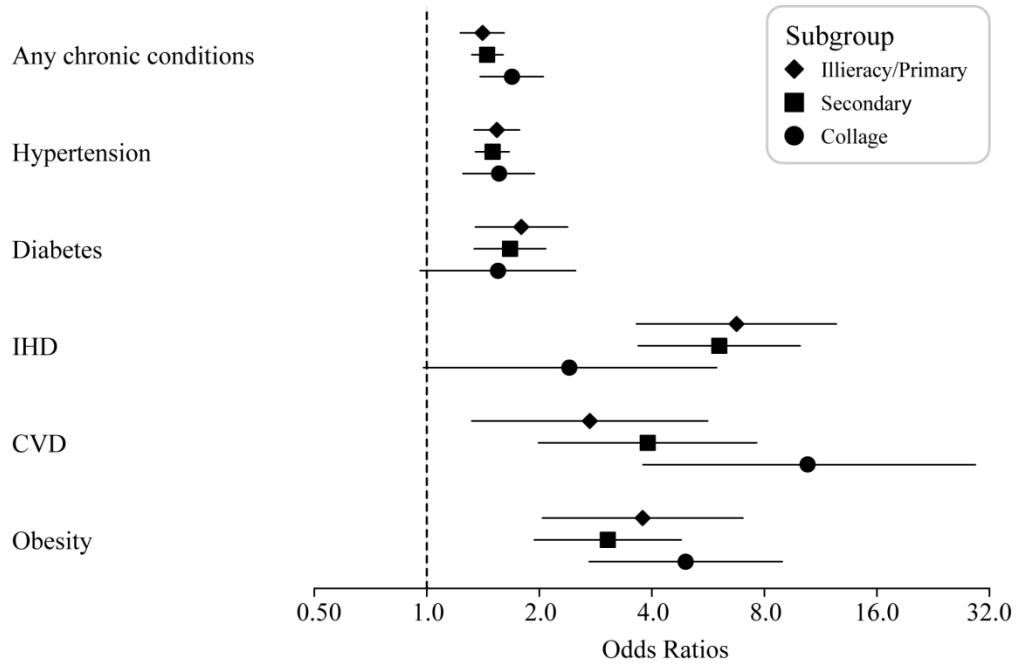

Figure 3 The forest plot of five chronic conditions subgroup analysis categorized by education status. The plot showed the adjusted odds ratios and 95% confidence interval of the association between each given chronic condition of individual with the same condition of household member.

163x108mm (300 x 300 DPI)

Table S1 The crude associations between one's chronic conditions and the disease status of their own household members - Scene 1 (N = 27,010)

| Exposure:                                                | Any chronic conditions |        | Hypertension        |        | Diabetes            |        | IHD                  |        | CVD                 |        | Obesity             |        |
|----------------------------------------------------------|------------------------|--------|---------------------|--------|---------------------|--------|----------------------|--------|---------------------|--------|---------------------|--------|
| chronic condition status of any other household members. | OR (95% CI)            | P      | OR (95% CI)         | P      | OR (95% CI)         | P      | OR (95% CI)          | P      | OR (95% CI)         | P      | OR (95% CI)         | P      |
| Any chronic conditions                                   | 1.60<br>(1.49-1.73)    | <.0001 | 1.63<br>(1.51-1.76) | <.0001 | 1.49<br>(1.35-1.66) | <.0001 | 1.60<br>(1.31-1.96)  | <.0001 | 1.35<br>(1.09-1.67) | 0.0059 | 1.30<br>(1.09-1.54) | 0.0029 |
| Hypertension                                             | 1.57<br>(1.47-1.69)    | <.0001 | 1.65<br>(1.52-1.78) | <.0001 | 1.40<br>(1.27-1.55) | <.0001 | 1.51<br>(1.24-1.83)  | <.0001 | 1.14<br>(0.92-1.41) | 0.2177 | 1.10<br>(0.93-1.29) | 0.2617 |
| Diabetes                                                 | 1.36<br>(1.24-1.48)    | <.0001 | 1.30<br>(1.20-1.42) | <.0001 | 1.73<br>(1.45-2.08) | <.0001 | 1.23<br>(0.93-1.63)  | 0.1493 | 1.29<br>(0.96-1.74) | 0.0910 | 1.44<br>(1.15-1.80) | 0.0015 |
| IHD                                                      | 1.40<br>(1.19-1.65)    | <.0001 | 1.40<br>(1.19-1.65) | <.0001 | 1.26<br>(0.96-1.67) | 0.0978 | 7.35<br>(5.04-10.72) | <.0001 | 2.06<br>(1.30-3.25) | 0.0019 | 0.89<br>(0.54-1.47) | 0.6472 |
| CVD                                                      | 1.20<br>(1.01-1.43)    | 0.0422 | 1.08<br>(0.89-1.29) | 0.4362 | 1.25<br>(0.95-1.66) | 0.1133 | 1.98<br>(1.26-3.13)  | 0.0032 | 4.45<br>(2.66-7.44) | <.0001 | 0.61<br>(0.31-1.18) | 0.1400 |
| Obesity                                                  | 1.22<br>(1.06-1.41)    | 0.0071 | 1.05<br>(0.91-1.21) | 0.4786 | 1.32<br>(1.07-1.64) | 0.0104 | 0.82<br>(0.50-1.36)  | 0.4434 | 0.58<br>(0.30-1.12) | 0.1056 | 3.43<br>(2.36-4.98) | <.0001 |

Note:

The chronic conditions on the top of table represented the status of participants. The chronic conditions on the left of the table represented the status of any other household members.

Table S2 The adjusted associations of subgroup analyses in all adult household members

| Exposure:                                                | Any chronic conditions |        | Hypertension        |        | Diabetes            |        | IHD                 |        | CVD                 |        | Obesity             |        |
|----------------------------------------------------------|------------------------|--------|---------------------|--------|---------------------|--------|---------------------|--------|---------------------|--------|---------------------|--------|
| chronic condition status of any other household members. | OR (95% CI)            | P      | OR (95% CI)         | P      | OR (95% CI)         | P      | OR (95% CI)         | P      | OR (95% CI)         | P      | OR (95% CI)         | P      |
| <b>Male</b>                                              |                        |        |                     |        |                     |        |                     |        |                     |        |                     |        |
| Any chronic conditions                                   | 1.44<br>(1.32-1.57)    | <.0001 | 1.44<br>(1.31-1.57) | <.0001 | 1.22<br>(1.07-1.41) | 0.0044 | 1.14<br>(0.85-1.53) | 0.3852 | 1.14<br>(0.84-1.56) | 0.4038 | 1.20<br>(0.95-1.51) | 0.1172 |
| Hypertension                                             | 1.43<br>(1.31-1.56)    | <.0001 | 1.48<br>(1.35-1.62) | <.0001 | 1.21<br>(1.05-1.39) | 0.0070 | 1.04<br>(0.78-1.38) | 0.8069 | 0.88<br>(0.64-1.19) | 0.4061 | 1.03<br>(0.81-1.30) | 0.8218 |
| Diabetes                                                 | 1.47<br>(1.28-1.67)    | <.0001 | 1.31<br>(1.15-1.50) | <.0001 | 1.74<br>(1.43-2.10) | <.0001 | 1.18<br>(0.78-1.77) | 0.4359 | 1.33<br>(0.88-2.03) | 0.1776 | 1.55<br>(1.13-2.12) | 0.0070 |
| IHD                                                      | 1.12<br>(0.87-1.43)    | 0.3866 | 1.14<br>(0.88-1.47) | 0.3252 | 0.93<br>(0.63-1.39) | 0.7375 | 5.49<br>(3.60-8.36) | <.0001 | 1.45<br>(0.74-2.86) | 0.2764 | 0.70<br>(0.32-1.55) | 0.3791 |
| CVD                                                      | 0.93<br>(0.70-1.24)    | 0.6254 | 0.80<br>(0.59-1.08) | 0.1487 | 0.94<br>(0.61-1.46) | 0.7936 | 1.64<br>(0.84-3.22) | 0.1484 | 3.54<br>(2.07-6.05) | <.0001 | 0.68<br>(0.28-1.67) | 0.4042 |
| Obesity                                                  | 1.65<br>(1.33-2.04)    | <.0001 | 1.31<br>(1.06-1.61) | 0.0115 | 1.27<br>(0.93-1.74) | 0.1271 | 1.04<br>(0.52-2.07) | 0.9131 | 0.87<br>(0.40-1.93) | 0.7368 | 3.84<br>(2.57-5.74) | <.0001 |
| <b>Female</b>                                            |                        |        |                     |        |                     |        |                     |        |                     |        |                     |        |
| Any chronic conditions                                   | 1.49<br>(1.36-1.63)    | <.0001 | 1.49<br>(1.36-1.63) | <.0001 | 1.39<br>(1.21-1.60) | <.0001 | 1.31<br>(1.01-1.71) | 0.0453 | 0.91<br>(0.68-1.22) | 0.5335 | 1.39<br>(1.10-1.75) | 0.0056 |
| Hypertension                                             | 1.49<br>(1.36-1.62)    | <.0001 | 1.55<br>(1.41-1.70) | <.0001 | 1.26<br>(1.10-1.45) | 0.0011 | 1.32<br>(1.02-1.71) | 0.0365 | 0.86<br>(0.64-1.15) | 0.3052 | 1.15<br>(0.92-1.45) | 0.2201 |

1  
2  
3  
4  
5  
6  
7  
8  
9  
10  
11  
12  
13  
14  
15  
16  
17  
18  
19  
20  
21  
22  
23  
24  
25  
26  
27  
28  
29  
30  
31  
32  
33  
34  
35  
36  
37  
38  
39  
40  
41  
42  
43  
44  
45  
46

| Exposure:                                                | Any chronic conditions |        | Hypertension        |        | Diabetes            |        | IHD                  |        | CVD                 |        | Obesity             |        |
|----------------------------------------------------------|------------------------|--------|---------------------|--------|---------------------|--------|----------------------|--------|---------------------|--------|---------------------|--------|
| chronic condition status of any other household members. | OR (95% CI)            | P      | OR (95% CI)         | P      | OR (95% CI)         | P      | OR (95% CI)          | P      | OR (95% CI)         | P      | OR (95% CI)         | P      |
| Diabetes                                                 | 1.31<br>(1.15-1.49)    | <.0001 | 1.28<br>(1.12-1.46) | 0.0003 | 1.67<br>(1.37-2.03) | <.0001 | 0.95<br>(0.65-1.40)  | 0.8038 | 0.95<br>(0.60-1.49) | 0.8158 | 1.32<br>(0.96-1.81) | 0.0902 |
| IHD                                                      | 1.06<br>(0.82-1.36)    | 0.6716 | 1.01<br>(0.78-1.31) | 0.9455 | 1.09<br>(0.75-1.59) | 0.6389 | 5.69<br>(3.78-8.54)  | <.0001 | 1.47<br>(0.75-2.87) | 0.2645 | 1.03<br>(0.52-2.01) | 0.9400 |
| CVD                                                      | 0.97<br>(0.74-1.26)    | 0.8189 | 0.83<br>(0.63-1.09) | 0.1782 | 1.16<br>(0.77-1.75) | 0.4648 | 1.43<br>(0.72-2.82)  | 0.3023 | 3.64<br>(2.19-6.08) | <.0001 | 0.52<br>(0.19-1.39) | 0.1907 |
| Obesity                                                  | 1.19<br>(0.94-1.49)    | 0.1443 | 1.00<br>(0.79-1.27) | 0.9974 | 1.52<br>(1.11-2.09) | 0.0100 | 0.65<br>(0.28-1.50)  | 0.3101 | 0.27<br>(0.06-1.11) | 0.0699 | 3.04<br>(1.97-4.68) | <.0001 |
| <b>Illiteracy/Primary</b>                                |                        |        |                     |        |                     |        |                      |        |                     |        |                     |        |
| Any chronic conditions                                   | 1.41<br>(1.23-1.61)    | <.0001 | 1.50<br>(1.31-1.71) | <.0001 | 1.16<br>(0.97-1.38) | 0.1064 | 0.95<br>(0.68-1.34)  | 0.7815 | 1.00<br>(0.74-1.35) | 0.9919 | 1.28<br>(0.92-1.80) | 0.1470 |
| Hypertension                                             | 1.44<br>(1.26-1.64)    | <.0001 | 1.54<br>(1.34-1.77) | <.0001 | 1.12<br>(0.94-1.33) | 0.2053 | 0.97<br>(0.70-1.35)  | 0.8688 | 0.99<br>(0.74-1.34) | 0.9727 | 1.00<br>(0.72-1.38) | 0.9855 |
| Diabetes                                                 | 1.20<br>(1.00-1.43)    | 0.0445 | 1.22<br>(1.03-1.44) | 0.0229 | 1.79<br>(1.35-2.38) | <.0001 | 0.70<br>(0.40-1.24)  | 0.2242 | 0.77<br>(0.48-1.26) | 0.3011 | 1.24<br>(0.77-2.00) | 0.3733 |
| IHD                                                      | 1.05<br>(0.74-1.48)    | 0.7975 | 0.97<br>(0.70-1.36) | 0.8720 | 0.86<br>(0.48-1.54) | 0.6177 | 6.74<br>(3.64-12.46) | <.0001 | 2.03<br>(1.05-3.92) | 0.0360 | 1.26<br>(0.48-3.36) | 0.6389 |
| CVD                                                      | 0.94<br>(0.68-1.29)    | 0.6994 | 0.85<br>(0.62-1.17) | 0.3135 | 0.83<br>(0.50-1.39) | 0.4814 | 1.86<br>(0.91-3.80)  | 0.0883 | 2.73<br>(1.32-5.64) | 0.0066 | 1.17<br>(0.49-2.81) | 0.7180 |

| Exposure:                                                | Any chronic conditions |        | Hypertension        |        | Diabetes            |        | IHD                 |        | CVD                 |        | Obesity             |        |
|----------------------------------------------------------|------------------------|--------|---------------------|--------|---------------------|--------|---------------------|--------|---------------------|--------|---------------------|--------|
| chronic condition status of any other household members. | OR (95% CI)            | P      | OR (95% CI)         | P      | OR (95% CI)         | P      | OR (95% CI)         | P      | OR (95% CI)         | P      | OR (95% CI)         | P      |
| Obesity                                                  | 1.31<br>(0.99-1.73)    | 0.0581 | 1.07<br>(0.81-1.40) | 0.6397 | 1.46<br>(1.01-2.13) | 0.0450 | 1.02<br>(0.45-2.32) | 0.9649 | 0.62<br>(0.25-1.54) | 0.3065 | 3.78<br>(2.04-7.01) | <.0001 |
| <b>Secondary</b>                                         |                        |        |                     |        |                     |        |                     |        |                     |        |                     |        |
| Any chronic conditions                                   | 1.45<br>(1.32-1.60)    | <.0001 | 1.43<br>(1.29-1.58) | <.0001 | 1.42<br>(1.23-1.62) | <.0001 | 1.46<br>(1.10-1.95) | 0.0096 | 0.97<br>(0.69-1.37) | 0.8698 | 1.13<br>(0.91-1.41) | 0.2763 |
| Hypertension                                             | 1.46<br>(1.33-1.61)    | <.0001 | 1.50<br>(1.35-1.66) | <.0001 | 1.32<br>(1.16-1.51) | <.0001 | 1.42<br>(1.07-1.88) | 0.0138 | 0.76<br>(0.53-1.08) | 0.1227 | 1.00<br>(0.80-1.25) | 0.9899 |
| Diabetes                                                 | 1.42<br>(1.25-1.62)    | <.0001 | 1.29<br>(1.13-1.46) | 0.0001 | 1.67<br>(1.34-2.08) | <.0001 | 1.28<br>(0.87-1.90) | 0.2140 | 1.61<br>(1.02-2.53) | 0.0395 | 1.46<br>(1.08-1.97) | 0.0139 |
| IHD                                                      | 1.05<br>(0.82-1.33)    | 0.7096 | 1.11<br>(0.86-1.42) | 0.4324 | 0.95<br>(0.65-1.39) | 0.7949 | 6.06<br>(3.68-9.97) | <.0001 | 0.83<br>(0.33-2.06) | 0.6857 | 0.51<br>(0.21-1.20) | 0.1231 |
| CVD                                                      | 0.93<br>(0.70-1.22)    | 0.5950 | 0.83<br>(0.62-1.12) | 0.2354 | 1.33<br>(0.90-1.96) | 0.1528 | 0.81<br>(0.32-2.04) | 0.6586 | 3.90<br>(1.99-7.63) | <.0001 | 0.24<br>(0.06-0.98) | 0.0467 |
| Obesity                                                  | 1.32<br>(1.06-1.64)    | 0.0132 | 1.14<br>(0.92-1.41) | 0.2223 | 1.30<br>(0.97-1.74) | 0.0767 | 0.73<br>(0.34-1.57) | 0.4245 | 0.67<br>(0.24-1.86) | 0.4398 | 3.05<br>(1.94-4.79) | <.0001 |
| <b>Collage</b>                                           |                        |        |                     |        |                     |        |                     |        |                     |        |                     |        |
| Any chronic conditions                                   | 1.69<br>(1.39-2.05)    | <.0001 | 1.55<br>(1.25-1.91) | <.0001 | 1.22<br>(0.88-1.68) | 0.2355 | 1.05<br>(0.63-1.75) | 0.8497 | 1.12<br>(0.56-2.23) | 0.7439 | 1.99<br>(1.36-2.89) | 0.0003 |
| Hypertension                                             | 1.53                   | <.0001 | 1.56                | <.0001 | 1.17                | 0.3432 | 0.93                | 0.7628 | 0.67                | 0.2673 | 1.62                | 0.0103 |

1  
2  
3  
4

| Exposure:                                                | Any chronic conditions |        | Hypertension        |        | Diabetes            |        | IHD                 |        | CVD                   |        | Obesity             |        |
|----------------------------------------------------------|------------------------|--------|---------------------|--------|---------------------|--------|---------------------|--------|-----------------------|--------|---------------------|--------|
| chronic condition status of any other household members. | OR (95% CI)            | P      | OR (95% CI)         | P      | OR (95% CI)         | P      | OR (95% CI)         | P      | OR (95% CI)           | P      | OR (95% CI)         | P      |
| Diabetes                                                 | 1.70<br>(1.33-2.16)    | <.0001 | 1.60<br>(1.22-2.09) | 0.0007 | 1.55<br>(0.96-2.50) | 0.0742 | 1.23<br>(0.63-2.41) | 0.5452 | 1.22<br>(0.51-2.93)   | 0.6546 | 1.69<br>(1.08-2.65) | 0.0220 |
| IHD                                                      | 1.21<br>(0.80-1.84)    | 0.3577 | 1.02<br>(0.64-1.63) | 0.9371 | 1.28<br>(0.69-2.39) | 0.4309 | 2.41<br>(0.98-5.96) | 0.0557 | 1.68<br>(0.58-4.87)   | 0.3376 | 1.58<br>(0.67-3.70) | 0.2928 |
| CVD                                                      | 1.20<br>(0.69-2.09)    | 0.5079 | 0.72<br>(0.37-1.39) | 0.3256 | 0.57<br>(0.20-1.62) | 0.2923 | 2.32<br>(0.85-6.28) | 0.0988 | 10.43<br>(3.71-29.34) | <.0001 | 0.88<br>(0.21-3.64) | 0.8569 |
| Obesity                                                  | 2.34<br>(1.52-3.60)    | 0.0001 | 1.51<br>(0.94-2.42) | 0.0848 | 1.70<br>(0.78-3.71) | 0.1829 | 0.83<br>(0.18-3.93) | 0.8179 | -                     | -      | 4.93<br>(2.72-8.93) | <.0001 |

23 Note:

24 The chronic conditions on the top of table represented the status of participants. The chronic conditions on the left of the table represented the status of any other  
 25 household members. The generalized estimating equations (GEE) model was adjusted for age, gender, health insurance status, education status, marriage status,  
 26 drinking and smoking. The adjusted GEE model was not fit for estimate the association between CVD and obesity in the “Collage” subgroup.  
 27  
 28  
 29  
 30  
 31  
 32  
 33  
 34  
 35  
 36  
 37  
 38  
 39  
 40  
 41  
 42  
 43  
 44  
 45  
 46

1  
2  
3  
4  
5  
6  
7  
8  
9  
10  
11  
12  
13  
14  
15  
16  
17  
18  
19  
20  
21  
22  
23  
24  
25  
26  
27  
28  
29  
30  
31  
32  
33  
34  
35  
36  
37  
38  
39  
40  
41  
42  
43  
44  
45  
46

Table S3 The crude associations of chronic conditions between children and their own parents - Scene 2 (N = 5,489 dyads)

| Exposure:                           | Any chronic conditions |        | Hypertension    |        | Diabetes          |        | Obesity           |        |
|-------------------------------------|------------------------|--------|-----------------|--------|-------------------|--------|-------------------|--------|
| chronic condition status of parents | OR (95% CI)            | P      | OR (95% CI)     | P      | OR (95% CI)       | P      | OR (95% CI)       | P      |
| Any chronic conditions              | 6.00(4.96-7.25)        | <.0001 | 6.60(5.25-8.28) | <.0001 | 6.36(3.98-10.18)  | <.0001 | 2.91(2.01-4.20)   | <.0001 |
| Hypertension                        | 4.72(3.95-5.64)        | <.0001 | 7.14(5.73-8.90) | <.0001 | 3.32(2.24-4.90)   | <.0001 | 1.61(1.13-2.29)   | 0.0085 |
| Diabetes                            | 2.26(1.78-2.87)        | <.0001 | 1.78(1.33-2.38) | <.0001 | 11.28(7.65-16.62) | <.0001 | 1.57(0.93-2.67)   | 0.0941 |
| Obesity                             | 3.09(2.07-4.60)        | <.0001 | 0.75(0.38-1.48) | 0.4126 | 1.98(0.79-4.94)   | 0.1449 | 14.88(9.35-23.68) | <.0001 |

Note:  
 The chronic conditions on the top of table represented the status of children. The chronic conditions on the left of the table represented the status of their parents.  
 The analyses of IHD and CVD were not conducted because of low prevalence rate in this subset.

Table S4 The crude associations of chronic conditions between wife and their own husband - Scene 3 (N = 7,844 spouses)

| Exposure:                                                | Any chronic conditions |        | Hypertension        |        | Diabetes            |        | IHD                    |        | CVD                   |        | Obesity             |        |
|----------------------------------------------------------|------------------------|--------|---------------------|--------|---------------------|--------|------------------------|--------|-----------------------|--------|---------------------|--------|
| chronic condition status of any other household members. | OR (95% CI)            | P      | OR (95% CI)         | P      | OR (95% CI)         | P      | OR (95% CI)            | P      | OR (95% CI)           | P      | OR (95% CI)         | P      |
| Any chronic conditions                                   | 2.88<br>(2.61-3.18)    | <.0001 | 2.80<br>(2.53-3.10) | <.0001 | 2.35<br>(1.96-2.82) | <.0001 | 3.41<br>(2.32-5.02)    | <.0001 | 1.82<br>(1.24-2.67)   | 0.0022 | 1.65<br>(1.20-2.26) | 0.0020 |
| Hypertension                                             | 2.92<br>(2.64-3.23)    | <.0001 | 2.94<br>(2.65-3.26) | <.0001 | 2.31<br>(1.93-2.78) | <.0001 | 3.30<br>(2.27-4.80)    | <.0001 | 1.62<br>(1.10-2.38)   | 0.0147 | 1.39<br>(1.01-1.93) | 0.0453 |
| Diabetes                                                 | 2.09<br>(1.78-2.46)    | <.0001 | 1.97<br>(1.67-2.33) | <.0001 | 2.12<br>(1.64-2.75) | <.0001 | 2.51<br>(1.55-4.05)    | 0.0002 | 0.92<br>(0.44-1.89)   | 0.8143 | 1.20<br>(0.70-2.06) | 0.5082 |
| IHD                                                      | 2.84<br>(2.01-4.01)    | <.0001 | 2.54<br>(1.80-3.59) | <.0001 | 2.38<br>(1.44-3.95) | 0.0008 | 18.21<br>(11.18-29.63) | <.0001 | 5.01<br>(2.39-10.53)  | <.0001 | 1.55<br>(0.57-4.26) | 0.3911 |
| CVD                                                      | 2.91<br>(2.01-4.19)    | <.0001 | 2.18<br>(1.51-3.15) | <.0001 | 2.02<br>(1.15-3.55) | 0.0150 | 3.68<br>(1.58-8.53)    | 0.0025 | 10.16<br>(5.51-18.73) | <.0001 | 1.75<br>(0.64-4.80) | 0.2782 |
| Obesity                                                  | 1.02<br>(0.74-1.39)    | 0.9177 | 0.73<br>(0.51-1.04) | 0.0822 | 1.42<br>(0.84-2.38) | 0.1863 | 0.72<br>(0.18-2.94)    | 0.6484 | 0.39<br>(0.05-2.83)   | 0.3542 | 4.73<br>(2.72-8.23) | <.0001 |

Note:

The chronic conditions on the top of table represented the status of wives. The chronic conditions on the left of the table represented the status of their husband.



## Statistical Analysis Plan

### Study design

From 1993 to 2013, the NHSS has been conducted for five times (every five years) which is a cross-sectional survey. The latest one was conducted in 2013, which was the fifth one. The 5<sup>th</sup> Health Service Survey of Shanghai was the extension of 5<sup>th</sup> NHSS. This survey was organized and conducted by the Shanghai Municipal Commission Health and Family Planning. The sampling method and quality assurance measures used in Shanghai survey were consistent with the national sampling approach and principle. The fifth Health Service Survey of Shanghai cover all of the 17 districts in Shanghai, and a three-stage, stratified, random sampling method was adopted. First stage, 100 towns/townships were selected randomly from all these 17 districts. Second stage, one thousand villages/communities were sampled randomly from these selected towns/townships. Third stage, about 12,000 households were identified randomly.

A face-to-face interview approach using structured household questionnaire, which was developed by the National Commission Health and Family Planning of China, was conducted for each household. The questionnaire contained the general information of household, the demographic characteristics of residents, the relationship of household members, self-reported illness and injury, outpatient and inpatient information.

To ensure the quality of this survey, some quality assurance measures were applied during the process of data collection. Logic errors would be checked among the data by survey constitutors. If there were logic errors, the investigators would contact the household members and verify the relevant information. The accuracy of data information were assessed by revisit-approach. The investigators revisited 5% of the sampled households and collected ten key questions to check the consistency of the information recorded. The consistency rates between these two visits was near to 99 %.

### Data management

Those who meet the following conditions will be excluded.

1. less than 18 years old
2. only one person in a household

Because the NHSS of Shanghai conducted well, there was little data missing in the data set. If one participate missed some important variables, he/she will be excluded from analyses.

For scene 1 (all household members), if any member in same household has a chronic condition this participate will be defined as an exposed one. For scene 2, if any child's parent has a chronic condition, then this child will be defined as an exposed one. For scene 3, if husband has a chronic condition, then his wife will be defined as an exposed one.

The generalized estimating equations (GEE) model with logit link will be used to estimate the odds ratio and 95% confidence interval of the chronic condition exposure.

### Statistical analysis

To adjust some socio-demographic characteristics, we will include following variables in GEE model to control the possible confoundings. The covariates are age (continuously specified in years), education status (illiteracy/primary, secondary or college), health insurance status (yes or no), smoking (yes or no), drinking (yes or no).

1  
2  
3 Except the analyses of spouse subset, gender (male or female) and marriage status  
4 (married, unmarried, divorced or widowed). For scene 3, there were only married  
5 women included in the analyses, so gender and marriage status will not be included in  
6 the GEE model.  
7

### 8 **Subgroup analysis**

9  
10 We are planed to performed two subgroup analysis. One is by gender (male or female)  
11 and the other is by education status (illiteracy/primary, secondary or collage).  
12 Illiteracy/primary means the education years were from 0 to 5 years, secondary means  
13 the education years were from 6 to 12 years, and collage means the education years of  
14 residents were higher than 12 years including undergraduate and graduate degrees. The  
15 reason why we perfrom this two subgroup analysis is this two factors may have a  
16 significant incluce on living habits which is the cause of chronic conditions.  
17

### 18 **Sensitivity analysis**

19  
20 We will also estimate the unadjusted odds ratio and 95% confidence interval as  
21 sensitivity analysis.  
22  
23  
24  
25  
26  
27  
28  
29  
30  
31  
32  
33  
34  
35  
36  
37  
38  
39  
40  
41  
42  
43  
44  
45  
46  
47  
48  
49  
50  
51  
52  
53  
54  
55  
56  
57  
58  
59  
60

## Supplementary S1 The STROBE checklist

STROBE Statement—Checklist of items that should be included in reports of *cross-sectional studies*

|                           | Item No | Recommendation                                                                                                                  | Check                                                                                                                                                                                                                                           |
|---------------------------|---------|---------------------------------------------------------------------------------------------------------------------------------|-------------------------------------------------------------------------------------------------------------------------------------------------------------------------------------------------------------------------------------------------|
| <b>Title and abstract</b> | 1       | (a) Indicate the study's design with a commonly used term in the title or the abstract                                          | Yes. We had indicated that this study is a cross-sectional study.                                                                                                                                                                               |
|                           |         | (b) Provide in the abstract an informative and balanced summary of what was done and what was found                             | Yes. These information was listed in "Abstract".                                                                                                                                                                                                |
| <b>Introduction</b>       |         |                                                                                                                                 |                                                                                                                                                                                                                                                 |
| Background/rationale      | 2       | Explain the scientific background and rationale for the investigation being reported                                            | Yes. The research about the concordance of chronic conditions among the household members could cause people and health management department to pay attention to the effect of co-residence factor in the prevalence of some chronic diseases. |
| Objectives                | 3       | State specific objectives, including any prespecified hypotheses                                                                | Yes. We did effort to test and explore the hypothesis that whether one's chronic conditions are related to the others with chronic conditions living in the same household.                                                                     |
| <b>Methods</b>            |         |                                                                                                                                 |                                                                                                                                                                                                                                                 |
| Study design              | 4       | Present key elements of study design early in the paper                                                                         | Yes. The data for this study was from the fifth Health Service Survey of Shanghai in 2013 (the extension of China's National Health Service Survey-NHSS), and this is a cross-sectional survey study.                                           |
| Setting                   | 5       | Describe the setting, locations, and relevant dates, including periods of recruitment, exposure, follow-up, and data collection | Yes. This health survey was conducted in Shanghai, China, in 2013. Details could be found in "Data source" section.                                                                                                                             |
| Participants              | 6       | (a) Give the eligibility criteria, and the sources and methods of selection of participants                                     | Yes. In our study, we included the households with at least two adults who aged 18 or older.                                                                                                                                                    |
| Variables                 | 7       | Clearly define all outcomes, exposures, predictors,                                                                             | Yes. We chose five chronic                                                                                                                                                                                                                      |

|                           |    |                                                                                                                                                                                      |                                                                                                                                                                                                                                                                                                                                                                              |
|---------------------------|----|--------------------------------------------------------------------------------------------------------------------------------------------------------------------------------------|------------------------------------------------------------------------------------------------------------------------------------------------------------------------------------------------------------------------------------------------------------------------------------------------------------------------------------------------------------------------------|
|                           |    | potential confounders, and effect modifiers. Give diagnostic criteria, if applicable                                                                                                 | conditions with high prevalence: hypertension, diabetes, Ischemic heart disease (IHD), cerebrovascular disease (CVD), obesity. Details could be found in “Five chronic conditions” section.                                                                                                                                                                                  |
| Data sources/ measurement | 8* | For each variable of interest, give sources of data and details of methods of assessment (measurement). Describe comparability of assessment methods if there is more than one group | Yes. These five chronic conditions were from the self-reported records in the questionnaires, and we chose these diseases according to the disease coding list of the NHSS.                                                                                                                                                                                                  |
| Bias                      | 9  | Describe any efforts to address potential sources of bias                                                                                                                            | Yes. Some socio-demographic characteristics would be included in our analyses as covariates: Age, gender, education status, marriage status, health insurance status, smoking, drinking.                                                                                                                                                                                     |
| Study size                | 10 | Explain how the study size was arrived at                                                                                                                                            | Yes. A total of 10,198 households (27,014 participants) with at least two adults who aged 18 or older were included in our study, and details could be found in figure 1.                                                                                                                                                                                                    |
| Quantitative variables    | 11 | Explain how quantitative variables were handled in the analyses. If applicable, describe which groupings were chosen and why                                                         | Yes. Then the generalized estimating equations (GEE) model with logit link would be used to find out the relationship between one’s chronic conditions and the others with chronic conditions living in the same household. And we would estimate these associations in three different household scenes: all household members, dyads of parents and children, and spouses. |
| Statistical methods       | 12 | (a) Describe all statistical methods, including those used to control for confounding                                                                                                | Yes. Then the generalized estimating equations (GEE)                                                                                                                                                                                                                                                                                                                         |

model with logit link would be used in our study with adjusting for age, gender, health insurance status, education status, marriage status, drinking and smoking.

(b) Describe any methods used to examine subgroups and interactions

Yes. The subgroup analyses would be conducted in all household members scene according to two pre-defined stratification factors: sex (male or female), education (illiteracy/primary, secondary, and college).

(c) Explain how missing data were addressed

Yes. We did not conducted any statistical model to deal with the missing data because of low missing data rate. The observation with missing data would be excluded from the final analyses.

(d) If applicable, describe analytical methods taking account of sampling strategy

Yes. The GEE model would be applicable to household data.

(e) Describe any sensitivity analyses

Yes. We also conducted crude GEE models to find out the relationship.

## Results

|                  |     |                                                                                                                                                                                                   |                                                                                   |
|------------------|-----|---------------------------------------------------------------------------------------------------------------------------------------------------------------------------------------------------|-----------------------------------------------------------------------------------|
| Participants     | 13* | (a) Report numbers of individuals at each stage of study—eg numbers potentially eligible, examined for eligibility, confirmed eligible, included in the study, completing follow-up, and analysed | Yes. The details could be found in the first paragraph of “Results” and figure 1. |
|                  |     | (b) Give reasons for non-participation at each stage                                                                                                                                              | Yes. The details could be found in the first paragraph of “Results” and figure 1. |
|                  |     | (c) Consider use of a flow diagram                                                                                                                                                                | Yes. The figure 1 is a flow diagram.                                              |
| Descriptive data | 14* | (a) Give characteristics of study participants (eg demographic, clinical, social) and information on exposures and potential confounders                                                          | Yes. The details could be found in the first paragraph of “Results” and table 1.  |
|                  |     | (b) Indicate number of participants with missing data for each variable of interest                                                                                                               | Yes. The details could be found in the first paragraph of “Results” and figure 1. |
| Outcome data     | 15* | Report numbers of outcome events or summary measures                                                                                                                                              | Yes. The details could be found in table 1.                                       |

|                                                                                                    |                   |    |                                                                                                                                                                                                                                                                                                                                                                                                                           |                                                                                                                                                                                                                                                                                                                            |
|----------------------------------------------------------------------------------------------------|-------------------|----|---------------------------------------------------------------------------------------------------------------------------------------------------------------------------------------------------------------------------------------------------------------------------------------------------------------------------------------------------------------------------------------------------------------------------|----------------------------------------------------------------------------------------------------------------------------------------------------------------------------------------------------------------------------------------------------------------------------------------------------------------------------|
| 1<br>2<br>3<br>4<br>5<br>6<br>7<br>8<br>9<br>10<br>11<br>12<br>13<br>14                            | Main results      | 16 | (a) Give unadjusted estimates and, if applicable, confounder-adjusted estimates and their precision (eg, 95% confidence interval). Make clear which confounders were adjusted for and why they were included<br><hr/> (b) Report category boundaries when continuous variables were categorized<br><hr/> (c) If relevant, consider translating estimates of relative risk into absolute risk for a meaningful time period | Yes. The final conclusion was based on the results of the adjusted models. The results of adjusted model were listed in table 2-4, and those of crude model were available in the supplemental tables.                                                                                                                     |
| 15<br>16<br>17<br>18<br>19                                                                         | Other analyses    | 17 | Report other analyses done—eg analyses of subgroups and interactions, and sensitivity analyses                                                                                                                                                                                                                                                                                                                            | Yes. The results of subgroup analyses were shown in figure 2 and supplemental table S2.                                                                                                                                                                                                                                    |
| 20                                                                                                 | <b>Discussion</b> |    |                                                                                                                                                                                                                                                                                                                                                                                                                           |                                                                                                                                                                                                                                                                                                                            |
| 21<br>22<br>23<br>24<br>25<br>26<br>27<br>28<br>29<br>30<br>31<br>32<br>33<br>34<br>35             | Key results       | 18 | Summarise key results with reference to study objectives                                                                                                                                                                                                                                                                                                                                                                  | Yes. We found that the participants who live with the household members with chronic conditions were associated with 46% higher OR of having one or more chronic condition. For these five chronic conditions, the above relationship was observed in each same chronic condition.                                         |
| 36<br>37<br>38<br>39                                                                               | Limitations       | 19 | Discuss limitations of the study, taking into account sources of potential bias or imprecision. Discuss both direction and magnitude of any potential bias                                                                                                                                                                                                                                                                | Yes. We discussed four points of limitation in the “Discussion” section.                                                                                                                                                                                                                                                   |
| 40<br>41<br>42<br>43<br>44<br>45<br>46<br>47<br>48<br>49<br>50<br>51<br>52<br>53<br>54<br>55<br>56 | Interpretation    | 20 | Give a cautious overall interpretation of results considering objectives, limitations, multiplicity of analyses, results from similar studies, and other relevant evidence                                                                                                                                                                                                                                                | Yes. The evidence about the effect of co-residence factor in some chronic conditions would suggest that people should pay more attention to their health status, especially those whose household members have chronic conditions. And the mechanisms about these associations should be investigated by further research. |
| 57<br>58<br>59<br>60                                                                               | Generalisability  | 21 | Discuss the generalisability (external validity) of the study results                                                                                                                                                                                                                                                                                                                                                     | Yes. The relationships of chronic conditions among the household members were consistent in three                                                                                                                                                                                                                          |

different scenes and subgroups.

---

### Other information

---

|         |    |                                                                                                                                                               |                                                                                                                                                                                                                    |
|---------|----|---------------------------------------------------------------------------------------------------------------------------------------------------------------|--------------------------------------------------------------------------------------------------------------------------------------------------------------------------------------------------------------------|
| Funding | 22 | Give the source of funding and the role of the funders for the present study and, if applicable, for the original study on which the present article is based | This study was conducted under a grant from the Fourth Round of Shanghai Three-year Action Plan on Public Health Discipline and Talent Program: Evidence-based Public Health and Health Economics(No. 15GWZK0901). |
|---------|----|---------------------------------------------------------------------------------------------------------------------------------------------------------------|--------------------------------------------------------------------------------------------------------------------------------------------------------------------------------------------------------------------|

---

\*Give information separately for exposed and unexposed groups.

**Note:** An Explanation and Elaboration article discusses each checklist item and gives methodological background and published examples of transparent reporting. The STROBE checklist is best used in conjunction with this article (freely available on the Web sites of PLoS Medicine at <http://www.plosmedicine.org/>, Annals of Internal Medicine at <http://www.annals.org/>, and Epidemiology at <http://www.epidem.com/>). Information on the STROBE Initiative is available at [www.strobe-statement.org](http://www.strobe-statement.org).

# BMJ Open

## The concordance of chronic conditions among the household members in Shanghai: a cross-sectional study

|                                 |                                                                                                                                                                                                                                                                                                                                                                                                                                                                                                                                                                              |
|---------------------------------|------------------------------------------------------------------------------------------------------------------------------------------------------------------------------------------------------------------------------------------------------------------------------------------------------------------------------------------------------------------------------------------------------------------------------------------------------------------------------------------------------------------------------------------------------------------------------|
| Journal:                        | <i>BMJ Open</i>                                                                                                                                                                                                                                                                                                                                                                                                                                                                                                                                                              |
| Manuscript ID                   | bmjopen-2019-031240.R1                                                                                                                                                                                                                                                                                                                                                                                                                                                                                                                                                       |
| Article Type:                   | Original research                                                                                                                                                                                                                                                                                                                                                                                                                                                                                                                                                            |
| Date Submitted by the Author:   | 07-Nov-2019                                                                                                                                                                                                                                                                                                                                                                                                                                                                                                                                                                  |
| Complete List of Authors:       | Qin, Yingyi; Second Military Medical University, Department of Health Statistics<br>Guo, Yibin; Second Military Medical University, Department of Health Statistics<br>Tang, Yuanjun; Shanghai General Hospital, School of Medicine, Shanghai Jiaotong University, Department of Clinical Pharmacy<br>Wu, cheng; Second Military Medical University, Department of Health Statistics<br>Zhang, Xinji; Second Military Medical University, Department of Health Statistics<br>He, Qian; Second Mil Med Univ, Department of Health Statistics<br>He, Jia; Second Mil Med Univ, |
| <b>Primary Subject Heading</b>: | Epidemiology                                                                                                                                                                                                                                                                                                                                                                                                                                                                                                                                                                 |
| Secondary Subject Heading:      | Epidemiology, Public health                                                                                                                                                                                                                                                                                                                                                                                                                                                                                                                                                  |
| Keywords:                       | chronic conditions, household, concordance                                                                                                                                                                                                                                                                                                                                                                                                                                                                                                                                   |
|                                 |                                                                                                                                                                                                                                                                                                                                                                                                                                                                                                                                                                              |

SCHOLARONE™  
Manuscripts



1  
2  
3  
4 **The concordance of chronic conditions among the household**  
5  
6 **members in Shanghai: a cross-sectional study**  
7

8 Yingyi Qin<sup>1†</sup>, Yibin Guo<sup>1†</sup>, Yuanjun Tang<sup>2†</sup>, Cheng Wu<sup>1</sup>, Xinji Zhang<sup>1</sup>, Qian He<sup>1</sup>,

9  
10 Jia He<sup>1\*</sup>

11  
12 No. 800 Xiangyin Road, Shanghai, China, 200092

13  
14 (1) Department of Health Statistics, Second Military Medical University, Shanghai,

15  
16 China

17  
18 (2) Department of Clinical Pharmacy, Shanghai General Hospital, School of  
19 Medicine, Shanghai Jiaotong University  
20

21  
22 †Equal contributors

23  
24 \*Correspondence: Prof. Jia He, Department of Health Statistics, Second Military Medical  
25 University, Shanghai, China, (e-mail: hejia63@yeah.net ;Tel: +86211871441).

26  
27 E-mail address:

28  
29 Yingyi Qin: yingyi\_qin@163.com

30  
31 Yibin Guo: guoyibin@smmu.edu.cn

32  
33 Yuanjun Tang: wh.tyj.2007@163.com

34  
35 Cheng Wu: wucheng\_wu@126.com

36  
37 Xinji Zhang: xinjizhang@yeah.net

38  
39 Qian He: heqian2008@hotmail.com

40  
41 Jia He: hejia63@yeah.net  
42  
43  
44  
45  
46  
47  
48  
49  
50  
51  
52  
53  
54  
55  
56  
57  
58  
59  
60

## Abstract

**Objectives:** Members living in the same household tend to share some similar behaviors and environment. We want to quantitatively assess the associations of chronic conditions to investigate the concordance of disease status among the household members.

**Setting:** Shanghai, China.

**Participants:** Our data was from the fifth Health Service Survey in Shanghai in 2013. 12,002 households with 31,531 residents were selected in this survey by using a three-stage, stratified, random sampling method.

**Outcome measures:** Five highly prevalent chronic conditions, namely hypertension, diabetes, ischemic heart disease (IHD), cerebrovascular disease (CVD), and obesity were chosen. The generalized estimating equations (GEE) model was used to estimate the associations adjusted for age, gender, education status, health insurance status, smoking, and drinking. Using a subsample of adult children with parents' chronic conditions as the key risk factor and a subsample of wives with the chronic conditions of the husband as key risk factor, we reran our GEE models to explore chronic condition concordance within these relationships.

**Results:** A total of 10,198 households with 27,010 adult participants were included. For all household members, we found positive statistically significant associations between one's chronic conditions and the same disease status of their household members (hypertension [odds ratio (OR) = 3.26, 95% confidence interval (CI): 3.02-3.52]; diabetes [OR = 1.68, 95% CI: 1.40-2.01]; IHD [OR = 5.31, 95% CI: 3.56-7.92]; CVD [OR = 3.40, 95% CI: 1.99-5.80]; and obesity [OR = 3.41, 95% CI: 2.34-4.96]). The results of analyzing ad-child subsample and spouse subsample also showed similar associations. Moreover, the potential concordance of different chronic conditions was found between hypertension and diabetes.

1  
2  
3  
4 **Conclusions:** We found chronic condition concordance within households. This study  
5  
6 provides evidence that the chronic conditions of other members of a household may be  
7  
8 a significant risk factor for a household member's own health.  
9

10 **Strength & Limitations:**

- 11  
12  
13 ● This is the first study in China to estimate the risk to a household member's own  
14 health, which associate with the chronic conditions of other household members.  
15 We perform multivariate logistic models to estimate the association between an  
16 adult's own chronic condition status and the chronic condition status of other  
17 household members. These models are run on several samples including all adult  
18 household members, children with parents' chronic conditions as key risk factor,  
19 and wives with husband's chronic conditions as key risk factor. The definition and  
20 diagnosis of chronic condition for each participant was based on his or her self-  
21 reported records.  
22  
23 ● This study was conducted in Shanghai and the results might not be generalized to  
24 other regions of China.  
25  
26 ● Based as it is on cross-sectional data, this study does not estimate the risk of a new  
27 chronic condition in a household member, nor does it provide evidence of a causal  
28 relationship.  
29  
30  
31  
32  
33  
34  
35  
36  
37  
38  
39  
40  
41  
42  
43  
44  
45  
46  
47  
48  
49  
50  
51  
52  
53  
54  
55  
56  
57  
58  
59  
60

**Key words:** chronic conditions; household; concordance

## Background

During the past three decades, China had experienced rapid social, economic and health services development<sup>1 2</sup>. Life expectancy has increased, lifestyles have changed, health care has become more accessible, and health insurance coverage has increased. Aligned with these remarkable improvements, healthcare concerns in the country have expanded from a narrow focus on infectious diseases to encompass treatment for non-communicable chronic conditions as well<sup>2-4</sup>. Research has shown the prevalence of hypertension increased from 5.11% in 1959 to 17.65% in 2002, and the prevalence of type 2 diabetes mellitus increased from 1% in 1980 to 9.7% in 2008<sup>5-7</sup>. In measuring disability-adjusted life-years (DALYs), non-communicable chronic conditions have become main contributors to a country's burden of disease. As of 2015, high systolic blood pressure, high fasting plasma glucose, and high body mass index respectively ranked 1<sup>st</sup>, 2<sup>nd</sup>, and 4<sup>th</sup> as important risk factors related to DALY. In 1990, the respective ranks of these three diseases were only 3<sup>rd</sup>, 10<sup>th</sup> and 13<sup>th</sup>.<sup>8</sup> As a typical city in China, Shanghai represents the direction of economic and healthy development in China. Noteworthy, aging is a significant issue in Shanghai. Moreover, this would bring about the new healthcare challenges for Chinese society and government<sup>9</sup>.

Improvement in health care and innovation of new effective medical treatments will definitely play an increasingly important role in dealing with chronic conditions. Additionally, detection of risk factors and identification of individuals at high-risk are the important first steps in the prevention and treatment of chronic conditions. To study the risk factors, various research has mainly focused on the personal lifestyles related to the risk of chronic conditions, for example smoking, drinking, exercise, and diet<sup>10-13</sup>. Some genetic mechanisms are also considered as the risk factors of chronic conditions<sup>14</sup><sup>15</sup>. The household environment, which integrate the lifestyles, genetic mechanisms and environmental factors, would be an important research direction in controlling the

1  
2  
3  
4 prevalence of chronic conditions<sup>16</sup>.  
5

6 Based on the fifth Health Service Survey of Shanghai, which was the extension of  
7  
8 China's National Health Service Survey (NHSS) in 2013, the prevalence rate was 27.24%  
9  
10 for hypertension and 7.05% for diabetes among 29,269 people aged 15 or older<sup>17</sup>.  
11  
12 Regarding hypertension, 6,096 out of 12,002 households (50.79%) had at least one  
13  
14 member with hypertension, and 1,733 households (28.43%) of these 6,096 households  
15  
16 had at least two members suffering from the disease. This result showed the possibility  
17  
18 of household clustering in the prevalence of chronic conditions. We hypothesized that  
19  
20 there were associations between chronic conditions in the participants and the same  
21  
22 conditions in their household members, we conducted the research and analyses using  
23  
24 data from the fifth Health Service Survey of Shanghai. In this study, we focused on five  
25  
26 highly prevalent chronic conditions: hypertension, diabetes, Ischemic heart disease  
27  
28 (IHD), cerebrovascular disease (CVD), and obesity. Risk factors based on chronic  
29  
30 conditions in other family members were detected for subsamples consisting of all  
31  
32 household members, adult children, and wives, respectively.  
33  
34  
35  
36  
37

## 38 **Methods**

### 39 **Data source**

40  
41 In this study, we used data from the fifth Health Service Survey of Shanghai in 2013.  
42  
43 This survey was organized and conducted by the Shanghai Municipal Commission  
44  
45 Health and Family Planning, and was the extension of NHSS. From 1993 to 2013, the  
46  
47 NHSS has been conducted for five times (every five years), and is a cross-sectional  
48  
49 survey study<sup>18</sup>. The sampling method and quality assurance measures used in Shanghai  
50  
51 survey were consistent with the national sampling approach and principle<sup>19</sup>. The fifth  
52  
53 Health Service Survey of Shanghai was conducted in all of the 17 districts in Shanghai.  
54  
55 The survey adopted a three-stage, stratified, random sampling method. In the first stage,  
56  
57  
58  
59  
60

1  
2  
3  
4 100 towns/townships were randomly selected from all these 17 districts. In the second  
5  
6 stage, one thousand villages/communities were randomly sampled from the selected  
7  
8 towns/townships. In the third stage, about 12,000 households were randomly selected.  
9  
10 We conducted a face-to-face interview with each household using a structured  
11  
12 household questionnaire developed by the National Commission Health and Family  
13  
14 Planning of China. The questionnaire contained the general information of the  
15  
16 households, the demographic characteristics of household members, relationships  
17  
18 among them, their self-reported illnesses and injuries, as well as their outpatient and  
19  
20 inpatient information.  
21  
22

23 To ensure the quality of this survey, certain assurance measures were applied during  
24  
25 the process of data collection. Survey constitutors checked potential logic errors of the  
26  
27 collected data. In case of any logic errors, the investigators would contact the household  
28  
29 members and verify the relevant information. The accuracy of data information was  
30  
31 assessed using the revisit approach. More specifically, the investigators revisited 5% of  
32  
33 the sampled households and collected ten key questions to check the consistency of the  
34  
35 information recorded. The consistency rate between these two visits was nearly 99 %.  
36  
37 Additionally, the Myer's Blended index was 7.39, indicating that there was non-  
38  
39 existence of age preference in this survey<sup>17 20</sup>. Finally, this survey collected the  
40  
41 information of 12,002 households with 31,531 participants. We included the  
42  
43 households with at least two adults aged 18 years or older.  
44  
45  
46  
47  
48  
49

### 50 **Five chronic conditions**

51 In this survey, we chose five chronic conditions with high prevalence rates:  
52  
53 hypertension, diabetes, IHD, CVD, and obesity. The definition of these chronic  
54  
55 conditions were based on the corresponding questions in the questionnaire, the disease  
56  
57 coding list of the NHSS, and Body mass index (BMI). If a participant chose "YES" or  
58  
59  
60

1  
2  
3  
4 a specific disease code, he or she was considered to have the corresponding chronic  
5  
6 condition.

7  
8 **Hypertension:** Hypertension was indicated based on the question “Have you ever been  
9  
10 told by a doctor that you have hypertension?” in the questionnaire.

11  
12 **Diabetes:** Diabetes was indicated based on the question “Have you ever been told by a  
13  
14 doctor that you have diabetes?” in the questionnaire.

15  
16 **IHD:** The disease codes for IHD included angina pectoris (061), myocardial infarction  
17  
18 (062), and other ischemic heart disease (063).

19  
20 **CVD:** The disease code for CVD included cerebrovascular disease (067).

21  
22 **Obesity:** Obesity was indicated by the World Health Organization (WHO)  
23  
24 International BMI categories ( $\text{BMI} \geq 30 \text{ kg/m}^2$ )<sup>21</sup>.

### 25 26 27 28 29 30 **Covariates**

31  
32 Socio-demographic characteristics added to our models as covariates include age  
33  
34 (continuously specified in years), education status (illiteracy/primary, secondary or  
35  
36 college), health insurance status (yes or no), marriage status (married, unmarried,  
37  
38 divorced or widowed), smoking (yes or no), and drinking (yes or no). Except the  
39  
40 analyses of spouse subsample, gender (male or female) was also included as a covariate.

### 41 42 43 44 45 **Statistical analyses**

46  
47 This study had five primary outcomes, each of which represented the status of each of  
48  
49 the five chronic conditions, namely hypertension, diabetes, IHD, CVD, and obesity, in  
50  
51 the participants (“No” or “Yes”). If a participant had any of these five chronic  
52  
53 conditions (“Yes”), his or her status of having “Any chronic condition” is considered  
54  
55 as “Yes”. To make a comprehensive assessment, we settled three subsamples: all adult  
56  
57 household members (the total sample), adult children (adult children subsample), and  
58  
59  
60

1  
2  
3  
4 wives (spouse subsample). In addition, we identified chronic conditions in the other  
5  
6 household members as the exposure (or risk factor) in three subsamples.  
7

8 For the first subsample of all adult household members, we included all household  
9  
10 members aged 18 years or older. If any other residents (excluding self) have the given  
11  
12 chronic conditions, the exposure status of household situation for each participant is  
13  
14 identified as “Yes”. For the second subsample of adult children, only adult children  
15  
16 would be included in analyses, and those participants were excluded if the disease  
17  
18 information of parents were not available. The chronic conditions status of their parents  
19  
20 were considered as exposure. For the third subsample of spouses, we included married  
21  
22 women in the analyses. We defined the chronic conditions of wives as the outcomes  
23  
24 and the chronic conditions of husbands as the exposure.  
25  
26

27  
28 The generalized estimating equations (GEE) model with logit link would be used to  
29  
30 explore the associations between chronic conditions of participants and the conditions  
31  
32 of the others living in the same household. We considered a two-level hierarchical  
33  
34 structure of the model (individuals within households). The model was based on  
35  
36 individual’s data without taking sampling weight into account due to the lack of  
37  
38 relevant information. The odds ratio (OR) and 95% confidence interval (CI) were  
39  
40 estimated by the GEE model to indicate the association between any chronic condition  
41  
42 or each given chronic condition of an individual and the same condition of household  
43  
44 member (e.g., the association between the hypertensive status of a participants and that  
45  
46 same condition in his or her other household members). Besides, the association of  
47  
48 different chronic conditions would also be assessed (e.g., the association between  
49  
50 hypertension in a participant and diabetes in other household members).  
51  
52

53 Adjusted models and unadjusted models were both used to estimate the associations in  
54  
55 three household subsamples. The adjusted models included age, gender, health  
56  
57 insurance status, education status, drinking and smoking; however, gender was  
58  
59  
60



1  
2  
3  
4 excluded in the third subsample. The final conclusion was based on the results of the  
5  
6 adjusted models. The results of unadjusted models would be obtained in supplementary  
7  
8 information. We chose the exchangeable working correlation matrix for GEE models.  
9  
10 The subgroup analyses were conducted for the first subsample according to two pre-  
11  
12 defined stratification factors: sex (male or female), education (illiteracy/primary,  
13  
14 secondary, and college). We did not conducted any statistical model to deal with the  
15  
16 missing data because of low missing data rates. Any observation with missing data  
17  
18 would be excluded from the final analyses. All data management and statistical analyses  
19  
20 were performed using SAS software (version 9.4; SAS Institute Inc., Cary, NC). All  
21  
22 reported p values were two-sided and p value < 0.05 was regarded as statistically  
23  
24 significant. This study was reported based on the Strengthening the Reporting of  
25  
26 Observational studies in Epidemiology (STROBE) guidelines (supplementary S1), and  
27  
28 all analyses were conducted according to the statistical analysis plan (supplementary  
29  
30 S2).  
31  
32  
33  
34  
35  
36  
37

### 38 **Patient and public involvement**

39 This is a cross-sectional study based on survey responses. It includes no further patient  
40  
41 involvement.  
42  
43  
44

### 45 **Results**

46  
47 A total of 10,198 households (27,010 participants) with at least two adults who aged 18  
48  
49 years or older were included in our study from the database of the fifth Health Service  
50  
51 Survey of Shanghai in 2013. For the second subsample, there were 5,489 available  
52  
53 records of adult children, and 7,844 records of spouses had been analyzed in the third  
54  
55 subsample. The detail information was shown in flowchart (Fig. 1). Table 1 has shown  
56  
57 the details of socio-demographic characteristics. The mean age of all included  
58  
59  
60

1  
2  
3  
4 participants was 52.63 years, and 31.34% (n=8,467) had at least one chronic condition.  
5  
6 However, the adult children participants in the second subsample were young (36.01  
7  
8 years), and the prevalence rates of chronic conditions were much low (11.89%).  
9

### 10 **All household members**

11  
12 In the first subsample, the results indicated that the chronic conditions of participants  
13 was associated with the same conditions of others living in the same household (the  
14 diagonal of Table 2): any chronic condition (OR =3.03, 95% CI: 2.81-3.28),  
15 hypertension (OR =3.26, 95% CI: 3.02-3.52), diabetes (OR = 1.68, 95% CI: 1.40-2.01),  
16 IHD (OR = 5.31, 95% CI: 3.56-7.92), CVD (OR = 3.40, 95% CI: 1.99-5.80), and  
17 obesity (OR = 3.41, 95% CI: 2.34-4.96). The results also revealed that there were  
18 significantly positive associations for some different chronic conditions (diabetes and  
19 hypertension, diabetes and obesity). The OR was 1.19 (95% CI: 1.08-1.32) for diabetes  
20 to hypertension and 1.23 (95% CI: 1.11-1.36) for hypertension to diabetes. The OR was  
21 1.36 (95% CI:1.08-1.73) for diabetes to obesity and 1.36 (95% CI: 1.09-1.70) for  
22 obesity to diabetes. More details s were presented in Table 2, and the results of  
23 unadjusted GEE models were listed in the Table S1.  
24  
25

26  
27 In subgroup analysis, we found the similar associations for the sex subgroups and  
28 education level subgroups (Fig. 2, Fig. 3 and Table S2). However, no significant  
29 association was not found in the analyses of diabetes and IHD in the college education  
30 subgroup.  
31  
32

### 33 **Adult children subsample**

34  
35 We did not conduct the analyses of IHD and CVD in this household subsample because  
36 of low prevalence rates (0.2% for IHD, and 0.15% for CVD). Table 3 listed the results  
37 of adjusted GEE models for adult children. The positive associations between chronic  
38 conditions of adult children and the same conditions of their parents were observed:  
39 any chronic condition (OR = 5.13, 95% CI: 4.20-6.28), hypertension (OR = 6.29, 95%  
40  
41  
42  
43  
44  
45  
46  
47  
48  
49  
50  
51  
52  
53  
54  
55  
56  
57  
58  
59  
60

1  
2  
3  
4 CI: 4.92-8.05), diabetes (OR = 11.56, 95% CI: 7.88-16.98), and obesity (OR = 13.85,  
5  
6 95% CI: 8.54-22.46). For different chronic conditions, the children with diabetes and  
7  
8 obesity were associated with parents with hypertension (OR was 2.40 for diabetes, and  
9  
10 OR was 1.69 for obesity). And the results also indicated that hypertension status of  
11  
12 children was associated with the diabetes status of their parents (OR = 1.61). The results  
13  
14 of unadjusted GEE models for the second household scene were listed in the Table S3.

### 17 **Spouses subsample**

18  
19 The results of the spouses subsample are shown in the Table 4. Similar to the other two  
20  
21 subsamples above , positive statistically significant associations were also observed  
22  
23 between chronic conditions in husbands and the same conditions in their spouses: any  
24  
25 chronic condition (OR = 1.58, 95% CI: 1.41-1.77), hypertension (OR = 1.63, 95% CI:  
26  
27 1.45-1.84), diabetes (OR = 1.57, 95% CI: 1.21-2.03), IHD (OR = 6.58, 95% CI: 3.78-  
28  
29 11.43), CVD (OR = 3.62, 95% CI: 1.86-7.07), and obesity (OR = 5.09, 95% CI: 2.92-  
30  
31 8.86). The wives with diabetes and IHD were associated with the hypertension status  
32  
33 of their husbands (OR was 1.46 for diabetes, and OR was 1.60 for IHD). And the  
34  
35 association between the hypertension status of wives and the diabetes status of  
36  
37 husbands was also indicated (OR = 1.29). The information of unadjusted GEE models  
38  
39 could be available in Table S4.  
40  
41  
42  
43  
44

### 45 **Discussion**

46  
47 In China, Shanghai has the heaviest burden of noncommunicable diseases because of  
48  
49 its largest population and ageing population<sup>22</sup>. We conducted in-depth analyses of the  
50  
51 associations among five pre-selected chronic conditions status within the household  
52  
53 members in Shanghai, China. Using the data of the fifth Health Service Survey, we  
54  
55 found that the participants living with their household members with chronic conditions  
56  
57 were associated with 46% higher OR of having one or more chronic conditions. For  
58  
59  
60

1  
2  
3  
4 each of five chronic conditions, the above associations were observed in each same  
5  
6 chronic condition. We also found the similar associations in children subsample and  
7  
8 spouses subsample. These results were consistent with some other research results<sup>16 23-</sup>  
9  
10 <sup>25</sup>. Additionally, the results suggested potential associations between the different  
11  
12 chronic conditions, for example hypertension and diabetes.

13  
14 We chose five chronic conditions (hypertension, diabetes, IHD, CVD, and obesity) as  
15  
16 the target diseases of our study because of the highest prevalence rates in this health  
17  
18 service survey. Based on the current knowledge, the incidence of the chronic conditions  
19  
20 is the result of the combination of multiple factors. The members of the same household  
21  
22 would live in the same environment, and might have the similar behaviors. In addition,  
23  
24 some of them would have genetic associations (e.g. parents and children, or brothers  
25  
26 and sisters). Some research reported the association between the family health history  
27  
28 and risk of disease<sup>26-28</sup>. Besides, if a member of the household was diagnosed with a  
29  
30 certain type of chronic condition, the likelihood of the other family members having  
31  
32 their diagnostic tests performed was higher. This phenomenon might cause reporting  
33  
34 bias and lead to the association of chronic conditions among household members. Our  
35  
36 study pointed out the positive associations between chronic conditions in adults and the  
37  
38 same conditions in their household members. According to the results of all household  
39  
40 members, we found that the ORs for IHD and CVD were high, and the 95% CI of the  
41  
42 corresponding ORs was wide. An explanation might be that the prevalence rates of IHD  
43  
44 and CVD were only 1.68% and 1.38%, respectively. Moreover, low prevalence rates  
45  
46 might reduce the accuracy of the statistical model estimation. However, the results of  
47  
48 both the adjusted GEE model and the unadjusted one showed the positive associations  
49  
50 for these two chronic conditions.

51  
52 In order to further explore the effect of a common living environment on the chronic  
53  
54 conditions, we conducted analyses in two subsamples. In the adult children sample,  
55  
56  
57  
58  
59  
60

1  
2  
3  
4 genetic factors had a significant impact on children's chronic conditions, besides certain  
5  
6 environment and behavior factors. Meanwhile, the effect of genetic factors was  
7  
8 excluded from the analyses of the spouses subsample. The positive associations, which  
9  
10 were similar to the results of all household members, were found in these two  
11  
12 subsamples. These findings were consistent with some previous studies<sup>23-25 29 30</sup>. The  
13  
14 results of analyses in these two special subsamples showed the effects of genetic factors  
15  
16 and those of a common living environment without genetic ties on the associations of  
17  
18 interest. Moreover, the adjusted ORs in analyses about children subsample were much  
19  
20 higher (e.g. OR = 6.12 for hypertension association). However, we could make a  
21  
22 conclusion that the effect of genetic factors was much more important. This might be  
23  
24 because certain chronic conditions are age-related diseases, and the prevalence rates of  
25  
26 adult children in this health service survey were low. For example, the prevalence of  
27  
28 hypertension among adult children was only 8.86% (the mean of age was 39.16 years  
29  
30 old), and prevalence rate for those whose parents had no hypertension was much lower  
31  
32 (only 3.34%, the mean of age was 34.36 years old). Based on this consideration, we  
33  
34 included the age covariate into the adjusted model. Therefore, these results might reflect  
35  
36 the associations between chronic conditions in children and those in their parents  
37  
38 despite high ORs. In order to show the effects of covariates more clearly, we listed the  
39  
40 results of full models for three subsamples in the Table S5. We found that the effects  
41  
42 of most covariates were consistent across three subsamples.

43  
44  
45  
46  
47 In addition to explore the association of the same chronic condition between  
48  
49 participants and their household members, the results of different chronic conditions  
50  
51 indicated that there was positive association between hypertension and diabetes. This  
52  
53 association was seen in all three subsamples. The mechanisms and pathways could not  
54  
55 be concluded in our study, but certain previous studies might provide some hypotheses.  
56  
57 The hypertension and diabetes are the syndromes of metabolic syndrome (MetS). Some  
58  
59  
60

1  
2  
3  
4 risk factors for MetS, such as lifestyle, diet, family disease history, environment, might  
5  
6 be the co-factors for the prevalence of hypertension and diabetes<sup>31-33</sup>. However, the  
7  
8 exact mechanisms should need further investigation.  
9

10 Although we did not provide certain specific risk factors for the prevalence of chronic  
11  
12 conditions, the quantitative assessment showed the concordance of chronic conditions  
13  
14 within households. We suggested that individuals whose household members had  
15  
16 certain chronic conditions should pay more attention to their health status. Health  
17  
18 education about chronic diseases and breaking some potential unhealthy behaviors  
19  
20 might help reduce the prevalence rates of chronic conditions among those individuals.  
21  
22 Moreover, regular health examination (e.g. measurement of blood pressure and weight)  
23  
24 would be helpful for residents to monitor their own health status. Shanghai is the biggest  
25  
26 and most developed city in China, and lends the development trend. Some researchers  
27  
28 indicated that Shanghai Chronic Disease Self-Management Program (CDSMP), the  
29  
30 most widely accepted self-management patient education programmer worldwide,  
31  
32 could improved participants' health behavior, self-efficacy, and health status<sup>22</sup>. Maybe  
33  
34 this program could be modified and acceptable to the healthy residents whose  
35  
36 household members have chronic conditions. Moreover, the chronic condition  
37  
38 concordance within households should also be given special care in other regions of  
39  
40 China, and the relevant solutions should be worked out advanced. These would be  
41  
42 beneficial for controlling the prevalence rate of chronic conditions and reducing the  
43  
44 disease burden for the country and among residents.  
45  
46  
47  
48

49 Our study had several potential limitations. First, the definition and diagnosis of chronic  
50  
51 condition for each participant was based on his or her self-reported records. This might  
52  
53 lead to the potential risk of underreporting and misreporting. However, this survey was  
54  
55 part of the NHSS and every investigator had undergone rigorous and formal training.  
56  
57 Previous research has shown the agreement between biomedical and self-reported  
58  
59  
60

1  
2  
3  
4 measurements of certain chronic conditions in a Chinese national community sample<sup>34</sup>.  
5  
6 Therefore, the records of these five chronic conditions would be reliable. Second, this  
7  
8 study was conducted in Shanghai and the results could not represent the situation in  
9  
10 other regions of China. Nevertheless, it could draw the attention of the public and health  
11  
12 management departments to this problem. Third, our study could neither estimate the  
13  
14 risk of new chronic conditions among household members nor find out a certain  
15  
16 significant risk factor. We only pointed out the phenomenon that there were  
17  
18 associations for the prevalence of chronic conditions at the household level. The  
19  
20 mechanism and specific causes of cohabitation effects on prevalence of chronic  
21  
22 conditions could not be presented by our study. These results suggested that we'd better  
23  
24 pay attention to the health status of the health residents in the households with members  
25  
26 with chronic conditions. Fourth, this study is a cross-sectional survey study, and several  
27  
28 potential bias, such as recall bias, confounding bias and reporting bias, might not be  
29  
30 completely avoided. The exclusion of households with only one family member might  
31  
32 also cause some selection bias. To deal with the confounding bias, we conducted the  
33  
34 analyses using the adjusted GEE models with some socio-demographic covariates.  
35  
36  
37  
38  
39  
40  
41  
42

### 43 **Conclusions**

44  
45 In conclusion, our study indicated that one's chronic condition status was associated  
46  
47 with the status of their household members in the Shanghai, China. The results of adult  
48  
49 children and spouses subsamples were consistent with those of all household members.  
50  
51 Additionally, analyses about different chronic conditions suggested possible positive  
52  
53 associations between hypertension and diabetes. The mechanisms about these  
54  
55 associations should be investigated by further research. However, the evidence about  
56  
57 the association of chronic conditions for the same household members suggests that  
58  
59  
60

1  
2  
3  
4 people should pay more attention to their health status, especially those whose  
5  
6 household members have chronic conditions. That might reduce the prevalence and  
7  
8 increase the early detection rate about some chronic conditions.  
9

## 10 11 12 **List of abbreviations**

13  
14  
15 IHD = ischemic heart disease

16  
17 CVD = cerebrovascular disease

18  
19 GEE = generalized estimating equations

20  
21 OR = odds ratio

22  
23 CI = confidence interval

24  
25 DALYs = disability-adjusted life-years

26  
27 NHSS = National Health Service Survey

28  
29 BMI = body mass index

30  
31 WHO = World Health Organization

32  
33 STROBE = Strengthening the Reporting of Observational studies in Epidemiology

34  
35 MetS = metabolic syndrome

36  
37 CDSMP = Chronic Disease Self-Management Program  
38  
39  
40  
41  
42

## 43 **Declarations**

### 44 **Ethics approval and consent to participate**

45  
46 This cross-sectional questionnaire survey was organized by the Shanghai Municipal  
47  
48 Commission Health and Family Planning. As we knew, this survey didn't contain any  
49  
50 treatment, blood drawing or others intervention which might influence the health of  
51  
52 participators. Informed consent was obtained by surveyors prior to data collection and  
53  
54 personal information was with strict conservation during our analysis process. Thus no  
55  
56 ethical approval is required for our study.  
57  
58  
59  
60



## Consent for publication

We give my consent for information about myself/my child or ward/my relative (circle as appropriate) to be published in *BMJ Open*.

## Data sharing

No.

## Data availability statement

Data are available upon reasonable request.

## Competing of interest

The authors declare that they have no competing interests.

## Funding

This study was conducted under a grant from the Fourth Round of Shanghai Three-year Action Plan on Public Health Discipline and Talent Program: Evidence-based Public Health and Health Economics(No. 15GWZK0901), Shanghai Sailing Program (No. 18YF1429500), National Thirteenth Five Year Plan Major Special Project (2017ZX09304016), and National Science and Technology Major Project (Grant No. 2017ZX09304030).

## Authors' contribution

Dr. Yingyi Qin, Dr. Yibin Guo and Prof. Jia He designed this study. Dr. Yingyi Qin, Dr. Yibin Guo and Prof. Cheng Wu analyzed the data. Prof. Qian He and Dr. Xinji Zhang checked the statistical analysis. Dr. Yibin Guo and Dr. Yingyi Qin wrote the manuscript. Mrs. Yuanjun Tang, Dr. Yingyi Qin, Dr. Yibin Guo and Prof. Jia He revised this manuscript.

## Acknowledge

We appreciate the Shanghai Municipal Commission Health and Family Planning for their assistance in designing this study. We also thank the participates and data managers who gave their time and effort to participate in the fifth Health Service Survey

of Shanghai.

## References

1. Meng Q, Xu L, Zhang Y, et al. Trends in access to health services and financial protection in China between 2003 and 2011: a cross-sectional study. *Lancet* 2012;379(9818):805-14. doi: 10.1016/S0140-6736(12)60278-5
2. Zhou M, Wang H, Zhu J, et al. Cause-specific mortality for 240 causes in China during 1990-2013: a systematic subnational analysis for the Global Burden of Disease Study 2013. *Lancet* 2016;387(10015):251-72. doi: 10.1016/S0140-6736(15)00551-6
3. Milner J, Wilkinson P. Trends in cause-specific mortality in Chinese provinces. *Lancet* 2016;387(10015):204-5. doi: 10.1016/S0140-6736(15)00553-X
4. Access GBDH, Quality Collaborators. Electronic address cue, Access GBDH, et al. Healthcare Access and Quality Index based on mortality from causes amenable to personal health care in 195 countries and territories, 1990-2015: a novel analysis from the Global Burden of Disease Study 2015. *Lancet* 2017;390(10091):231-66. doi: 10.1016/S0140-6736(17)30818-8
5. Ruan Y, Mo M, Joss-Moore L, et al. Increased waist circumference and prevalence of type 2 diabetes and hypertension in Chinese adults: two population-based cross-sectional surveys in Shanghai, China. *BMJ open* 2013;3(10):e003408. doi: 10.1136/bmjopen-2013-003408
6. Wu Y, Huxley R, Li L, et al. Prevalence, awareness, treatment, and control of hypertension in China: data from the China National Nutrition and Health Survey 2002. *Circulation*

- 2008;118(25):2679-86. doi: 10.1161/CIRCULATIONAHA.108.788166
7. Yang W, Lu J, Weng J, et al. Prevalence of diabetes among men and women in China. *The New England journal of medicine* 2010;362(12):1090-101. doi: 10.1056/NEJMoa0908292
8. Cohen AJ, Brauer M, Burnett R, et al. Estimates and 25-year trends of the global burden of disease attributable to ambient air pollution: an analysis of data from the Global Burden of Diseases Study 2015. *Lancet* 2017;389(10082):1907-18. doi: 10.1016/S0140-6736(17)30505-6
9. Fang EF, Scheibye-Knudsen M, Jahn HJ, et al. A research agenda for aging in China in the 21st century. *Ageing research reviews* 2015;24(Pt B):197-205. doi: 10.1016/j.arr.2015.08.003
10. Orozco LJ, Buchleitner AM, Gimenez-Perez G, et al. Exercise or exercise and diet for preventing type 2 diabetes mellitus. *The Cochrane database of systematic reviews* 2008(3):CD003054. doi: 10.1002/14651858.CD003054.pub3
11. Yu R, Yan LL, Wang H, et al. Effectiveness of a community-based individualized lifestyle intervention among older adults with diabetes and hypertension, Tianjin, China, 2008-2009. *Preventing chronic disease* 2014;11:E84. doi: 10.5888/pcd11.120333
12. Pan A, Wang Y, Talaei M, et al. Relation of active, passive, and quitting smoking with incident type 2 diabetes: a systematic review and meta-analysis. *The lancet Diabetes & endocrinology* 2015;3(12):958-67. doi: 10.1016/S2213-8587(15)00316-2
13. Knott C, Bell S, Britton A. Alcohol Consumption and the Risk of Type 2 Diabetes: A Systematic Review and Dose-Response Meta-analysis of More Than 1.9 Million

- 1  
2  
3  
4 Individuals From 38 Observational Studies. *Diabetes care* 2015;38(9):1804-12. doi:  
5  
6 10.2337/dc15-0710  
7  
8  
9  
10 14. Replication DIG, Meta-analysis C, Asian Genetic Epidemiology Network Type 2 Diabetes  
11  
12 C, et al. Genome-wide trans-ancestry meta-analysis provides insight into the genetic  
13  
14 architecture of type 2 diabetes susceptibility. *Nature genetics* 2014;46(3):234-44. doi:  
15  
16 10.1038/ng.2897  
17  
18  
19  
20 15. Zhang C, Wang L, Liao Q, et al. Genetic associations with hypertension: meta-analyses of  
21  
22 six candidate genetic variants. *Genetic testing and molecular biomarkers*  
23  
24 2013;17(10):736-42. doi: 10.1089/gtmb.2013.0080  
25  
26  
27  
28 16. Patel SA, Dhillon PK, Kondal D, et al. Chronic disease concordance within Indian  
29  
30 households: A cross-sectional study. *PLoS medicine* 2017;14(9):e1002395. doi:  
31  
32 10.1371/journal.pmed.1002395  
33  
34  
35  
36 17. Zhang X, Zhang Y, Xiao X, et al. The relation between health insurance and management  
37  
38 of hypertension in Shanghai, China: a cross-sectional study. *BMC public health*  
39  
40 2016;16:959. doi: 10.1186/s12889-016-3627-3  
41  
42  
43  
44 18. Yuefeng L, Keqin R, Xiaowei R. Use of and factors associated with self-treatment in China.  
45  
46 *BMC public health* 2012;12:995. doi: 10.1186/1471-2458-12-995  
47  
48  
49  
50 19. Xu Y, Gao J, Zhou Z, et al. Measurement and explanation of socioeconomic inequality in  
51  
52 catastrophic health care expenditure: evidence from the rural areas of Shaanxi  
53  
54 Province. *BMC health services research* 2015;15:256. doi: 10.1186/s12913-015-0892-  
55  
56 2  
57  
58  
59 20. Bello Y. Error Detection in Outpatients' Age Data Using Demographic Techniques. *Int J*  
60

- 1  
2  
3  
4 *Pure Appl Sci Technol* 2012;10:27–36  
5  
6  
7 21. Obesity: preventing and managing the global epidemic. Report of a WHO consultation.  
8  
9 *World Health Organization technical report series* 2000;894:i-xii, 1-253.  
10  
11  
12 22. Fu D, Fu H, McGowan P, et al. Implementation and quantitative evaluation of chronic  
13  
14 disease self-management programme in Shanghai, China: randomized controlled trial.  
15  
16 *Bulletin of the World Health Organization* 2003;81(3):174-82.  
17  
18  
19 23. Lee MH, Kim HC, Thomas GN, et al. Familial concordance of metabolic syndrome in Korean  
20  
21 population--Korean National Health and Nutrition Examination Survey 2005. *Diabetes*  
22  
23 *research and clinical practice* 2011;93(3):430-6. doi: 10.1016/j.diabres.2011.06.002  
24  
25  
26  
27 24. Okuda T, Miyazaki T, Sakuragi S, et al. Significant but weak spousal concordance of  
28  
29 metabolic syndrome components in Japanese couples. *Environmental health and*  
30  
31 *preventive medicine* 2014;19(2):108-16. doi: 10.1007/s12199-013-0361-7  
32  
33  
34  
35 25. Sun J, Lu J, Wang W, et al. Prevalence of Diabetes and Cardiometabolic Disorders in  
36  
37 Spouses of Diabetic Individuals. *American journal of epidemiology* 2016;184(5):400-9.  
38  
39 doi: 10.1093/aje/kwv330  
40  
41  
42  
43 26. Baptiste-Roberts K, Gary TL, Beckles GL, et al. Family history of diabetes, awareness of  
44  
45 risk factors, and health behaviors among African Americans. *American journal of public*  
46  
47 *health* 2007;97(5):907-12. doi: 10.2105/AJPH.2005.077032  
48  
49  
50  
51 27. Carroll JC, Campbell-Scherer D, Permaul JA, et al. Assessing family history of chronic  
52  
53 disease in primary care: Prevalence, documentation, and appropriate screening.  
54  
55 *Canadian family physician Medecin de famille canadien* 2017;63(1):e58-e67.  
56  
57  
58  
59 28. Welch BM, Dere W, Schiffman JD. Family health history: the case for better tools. *Jama*  
60

- 2015;313(17):1711-2. doi: 10.1001/jama.2015.2417
29. Park HS, Park JY, Cho SI. Familial aggregation of the metabolic syndrome in Korean families with adolescents. *Atherosclerosis* 2006;186(1):215-21. doi: 10.1016/j.atherosclerosis.2005.07.019
30. Di Castelnuovo A, Quacquarello G, Donati MB, et al. Spousal concordance for major coronary risk factors: a systematic review and meta-analysis. *American journal of epidemiology* 2009;169(1):1-8. doi: 10.1093/aje/kwn234
31. Wilson PW, D'Agostino RB, Parise H, et al. Metabolic syndrome as a precursor of cardiovascular disease and type 2 diabetes mellitus. *Circulation* 2005;112(20):3066-72. doi: 10.1161/CIRCULATIONAHA.105.539528
32. Buscemi S, Sprini D, Grosso G, et al. Impact of lifestyle on metabolic syndrome in apparently healthy people. *Eating and weight disorders : EWD* 2014;19(2):225-32. doi: 10.1007/s40519-014-0117-4
33. Kim MJ, Lim NK, Choi SJ, et al. Hypertension is an independent risk factor for type 2 diabetes: the Korean genome and epidemiology study. *Hypertension research : official journal of the Japanese Society of Hypertension* 2015;38(11):783-9. doi: 10.1038/hr.2015.72
34. Meng N, Zhang Q, Yang M. Comparison of self-reported and biomedical data on hypertension and diabetes: findings from the China Health and Retirement Longitudinal Study (CHARLS). *BMJ open* 2016;6(1):e009836.

### Figure legends

Figure 1 The flow chart of participates selection of the three subsamples analysis

Figure 2 The forest plot of five chronic conditions subgroup analysis categorized by gender. The plot showed the adjusted odds ratios and 95% confidence interval of the association between each given chronic condition of individual with the same condition of household member.

Figure 3 The forest plot of five chronic conditions subgroup analysis categorized by education status. The plot showed the adjusted odds ratios and 95% confidence interval of the association between each given chronic condition of individual with the same condition of household member.

Table 1 Socio-demographic characteristics of participants

| Characteristic                               | All household |                       |                    |
|----------------------------------------------|---------------|-----------------------|--------------------|
|                                              | members       | Children <sup>a</sup> | Wives <sup>b</sup> |
| <b>No. of households</b>                     | 10,198        | 4,865                 | 7,211              |
| <b>No. of participates</b>                   | 27,014        | 5,493                 | 7,845              |
| <b>Age, years, mean (SD)</b>                 | 52.63(17.06)  | 36.01(12.18)          | 54.01(13.85)       |
| <b>Male, n (%)</b>                           | 13,182(48.8)  | 3,273(59.58)          | -                  |
| <b>Education status, n (%)<sup>c,e</sup></b> |               |                       |                    |
| Illiteracy/Primary                           | 5,801(21.47)  | 334(6.08)             | 2,191(27.93)       |
| Secondary                                    | 14,484(53.62) | 2,481(45.17)          | 4,551(58.01)       |
| Collage                                      | 6,727(24.9)   | 2,678(48.75)          | 1,102(14.05)       |
| <b>Marriage status, n (%)<sup>f</sup></b>    |               |                       |                    |
| Unmarried                                    | 3,124(11.56)  | 2,286(41.62)          | -                  |
| Married                                      | 22,116(81.87) | 2,924(53.23)          | -                  |
| Divorced or widowed                          | 1,772(6.56)   | 283(5.15)             | -                  |
| <b>Insurance, n (%)</b>                      | 26,011(96.29) | 5,247(95.52)          | 7,575(96.56)       |
| <b>Drinking, n (%)</b>                       | 5,157(19.09)  | 944(17.19)            | 222(2.83)          |
| <b>Smoking, n (%)</b>                        | 6,392(23.66)  | 1,460(26.58)          | 166(2.12)          |
| <b>Chronic conditions, n (%)</b>             |               |                       |                    |
| Any chronic conditions <sup>d</sup>          | 8,467(31.34)  | 653(11.89)            | 2,414(30.77)       |
| Hypertension                                 | 7,245(26.82)  | 480(8.74)             | 2,102(26.79)       |
| Diabetes                                     | 1,875(6.94)   | 110(2)                | 498(6.35)          |
| IHD                                          | 455(1.68)     | 11(0.2)               | 117(1.49)          |
| CVD                                          | 372(1.38)     | 8(0.15)               | 106(1.35)          |
| Obesity                                      | 631(2.34)     | 128(2.33)             | 156(1.99)          |

Notes:

a The characteristics of children in parents-children subsample.

b The characteristics of wives in spouses subsample.

c “Illiteracy/Primary” in education status means the education years were from 0 to 5 years, “secondary” means the education years were from 6 to 12 years, and “collage” means the education years of residents were higher than 12 years including undergraduate and graduate degrees.

d The participants had at least one chronic condition.

IHD: Ischemic Heart Disease; CVD: Cerebrovascular Disease.

e There were 2 participates missing in education status in data set.

f There were 2 participates missing in marriage status in data set.



Table 2 The adjusted associations between one’s chronic conditions and the disease status of their own household members - Scene 1 (N = 27,010)

| Exposure:                                                | Any chronic conditions |         | Hypertension        |         | Diabetes            |         | IHD                 |         | CVD                 |         | Obesity             |         |
|----------------------------------------------------------|------------------------|---------|---------------------|---------|---------------------|---------|---------------------|---------|---------------------|---------|---------------------|---------|
| Chronic condition status of any other household members. | OR (95% CI)            | P       | OR (95% CI)         | P       | OR (95% CI)         | P       | OR (95% CI)         | P       | OR (95% CI)         | P       | OR (95% CI)         | P       |
| Any chronic conditions                                   | 3.03<br>(2.81-3.28)    | <0.0001 | 1.46<br>(1.34-1.58) | <0.0001 | 1.25<br>(1.12-1.39) | <0.0001 | 1.23<br>(1.00-1.51) | 0.0467  | 0.96<br>(0.77-1.19) | 0.6906  | 1.29<br>(1.09-1.53) | 0.0034  |
| Hypertension                                             | 1.26<br>(1.17-1.37)    | <0.0001 | 3.26<br>(3.02-3.52) | <0.0001 | 1.23<br>(1.11-1.36) | <0.0001 | 1.15<br>(0.94-1.40) | 0.1742  | 0.84<br>(0.68-1.04) | 0.1177  | 1.02<br>(0.86-1.20) | 0.8257  |
| Diabetes                                                 | 1.38<br>(1.25-1.52)    | <0.0001 | 1.19<br>(1.08-1.32) | 0.0005  | 1.68<br>(1.40-2.01) | <0.0001 | 1.06<br>(0.79-1.42) | 0.6846  | 1.10<br>(0.80-1.50) | 0.5632  | 1.36<br>(1.08-1.73) | 0.0099  |
| IHD                                                      | 1.08<br>(0.90-1.30)    | 0.3911  | 1.07<br>(0.88-1.29) | 0.5015  | 1.00<br>(0.75-1.33) | 0.9949  | 5.31<br>(3.56-7.92) | <0.0001 | 1.46<br>(0.90-2.35) | 0.1224  | 0.90<br>(0.54-1.50) | 0.6846  |
| CVD                                                      | 0.95<br>(0.77-1.16)    | 0.5856  | 0.81<br>(0.66-1.00) | 0.0526  | 1.03<br>(0.76-1.40) | 0.8473  | 1.51<br>(0.93-2.43) | 0.0951  | 3.40<br>(1.99-5.80) | <0.0001 | 0.60<br>(0.31-1.15) | 0.1251  |
| Obesity                                                  | 1.40<br>(1.18-1.66)    | 0.0001  | 1.06<br>(0.90-1.25) | 0.4697  | 1.36<br>(1.09-1.70) | 0.0076  | 0.86<br>(0.51-1.45) | 0.5663  | 0.58<br>(0.29-1.15) | 0.1172  | 3.41<br>(2.34-4.96) | <0.0001 |

Note:  
 The chronic conditions on the top of table represented the status of participants. The chronic conditions on the left of the table represented the status of any other household members. The generalized estimating equations (GEE) model was adjusted for age, gender, health insurance status, education status, drinking and smoking.

Table 3 The adjusted associations of chronic conditions between children and their own parents - Scene 2 (N = 5,489 dyads)

| Exposure:                           | Any chronic conditions |        | Hypertension    |        | Diabetes          |        | Obesity           |        |
|-------------------------------------|------------------------|--------|-----------------|--------|-------------------|--------|-------------------|--------|
| chronic condition status of parents | OR (95% CI)            | P      | OR (95% CI)     | P      | OR (95% CI)       | P      | OR (95% CI)       | P      |
| Any chronic conditions              | 5.13(4.20-6.28)        | <.0001 | 5.58(4.34-7.17) | <.0001 | 4.66(2.90-7.48)   | <.0001 | 3.02(2.07-4.42)   | <.0001 |
| Hypertension                        | 3.93(3.25-4.75)        | <.0001 | 6.29(4.92-8.05) | <.0001 | 2.40(1.61-3.57)   | <.0001 | 1.69(1.17-2.44)   | 0.0056 |
| Diabetes                            | 2.16(1.66-2.81)        | <.0001 | 1.61(1.16-2.25) | 0.0047 | 11.56(7.88-16.98) | <.0001 | 1.51(0.88-2.57)   | 0.1346 |
| Obesity                             | 5.23(3.24-8.45)        | <.0001 | 1.00(0.45-2.21) | 0.9951 | 2.47(0.95-6.42)   | 0.0639 | 13.85(8.54-22.46) | <.0001 |

Note:

The chronic conditions on the top of table represented the status of children. The chronic conditions on the left of the table represented the status of their parents. The analyses of IHD and CVD were not conducted because of low prevalence rate in this subset. The generalized estimating equations (GEE) model was adjusted for age, gender, health insurance status, education status, drinking and smoking.

Table 4 The adjusted associations of chronic conditions between wife and their own husband - Scene 3 (N = 7,844 spouses)

| Exposure:<br>chronic condition status of any<br>other household members. | Any chronic conditions |        | Hypertension        |        | Diabetes            |        | IHD                  |        | CVD                 |        | Obesity             |        |
|--------------------------------------------------------------------------|------------------------|--------|---------------------|--------|---------------------|--------|----------------------|--------|---------------------|--------|---------------------|--------|
|                                                                          | OR (95% CI)            | P      | OR (95% CI)         | P      | OR (95% CI)         | P      | OR (95% CI)          | P      | OR (95% CI)         | P      | OR (95% CI)         | P      |
| Any chronic conditions                                                   | 1.58<br>(1.41-1.77)    | <.0001 | 1.55<br>(1.38-1.74) | <.0001 | 1.48<br>(1.22-1.80) | <.0001 | 1.64<br>(1.09-2.46)  | 0.0166 | 0.84<br>(0.56-1.26) | 0.3992 | 1.35<br>(0.96-1.90) | 0.0892 |
| Hypertension                                                             | 1.59<br>(1.42-1.79)    | <.0001 | 1.63<br>(1.45-1.84) | <.0001 | 1.46<br>(1.20-1.77) | 0.0001 | 1.60<br>(1.08-2.37)  | 0.0182 | 0.76<br>(0.51-1.14) | 0.1783 | 1.11<br>(0.79-1.56) | 0.5353 |
| Diabetes                                                                 | 1.35<br>(1.13-1.63)    | 0.0011 | 1.29<br>(1.07-1.55) | 0.0069 | 1.57<br>(1.21-2.03) | 0.0007 | 1.48<br>(0.90-2.44)  | 0.1197 | 0.57<br>(0.27-1.21) | 0.1427 | 1.02<br>(0.59-1.77) | 0.9357 |
| IHD                                                                      | 1.05<br>(0.72-1.54)    | 0.7996 | 0.96<br>(0.65-1.42) | 0.8379 | 1.22<br>(0.71-2.09) | 0.4762 | 6.58<br>(3.78-11.43) | <.0001 | 1.68<br>(0.76-3.69) | 0.1994 | 1.17<br>(0.42-3.25) | 0.7684 |
| CVD                                                                      | 1.10<br>(0.72-1.67)    | 0.6596 | 0.80<br>(0.52-1.23) | 0.3101 | 0.99<br>(0.54-1.82) | 0.9847 | 1.36<br>(0.53-3.48)  | 0.5263 | 3.62<br>(1.86-7.07) | 0.0002 | 1.28<br>(0.46-3.54) | 0.6403 |
| Obesity                                                                  | 1.29<br>(0.90-1.85)    | 0.1670 | 0.87<br>(0.59-1.29) | 0.4888 | 1.69<br>(0.99-2.88) | 0.0553 | 1.03<br>(0.27-3.96)  | 0.9700 | 0.58<br>(0.08-4.31) | 0.5953 | 5.09<br>(2.92-8.86) | <.0001 |

Note:

The chronic conditions on the top of table represented the status of wives. The chronic conditions on the left of the table represented the status of their husband. The generalized estimating equations (GEE) model was adjusted for age, health insurance status, education status, drinking and smoking.

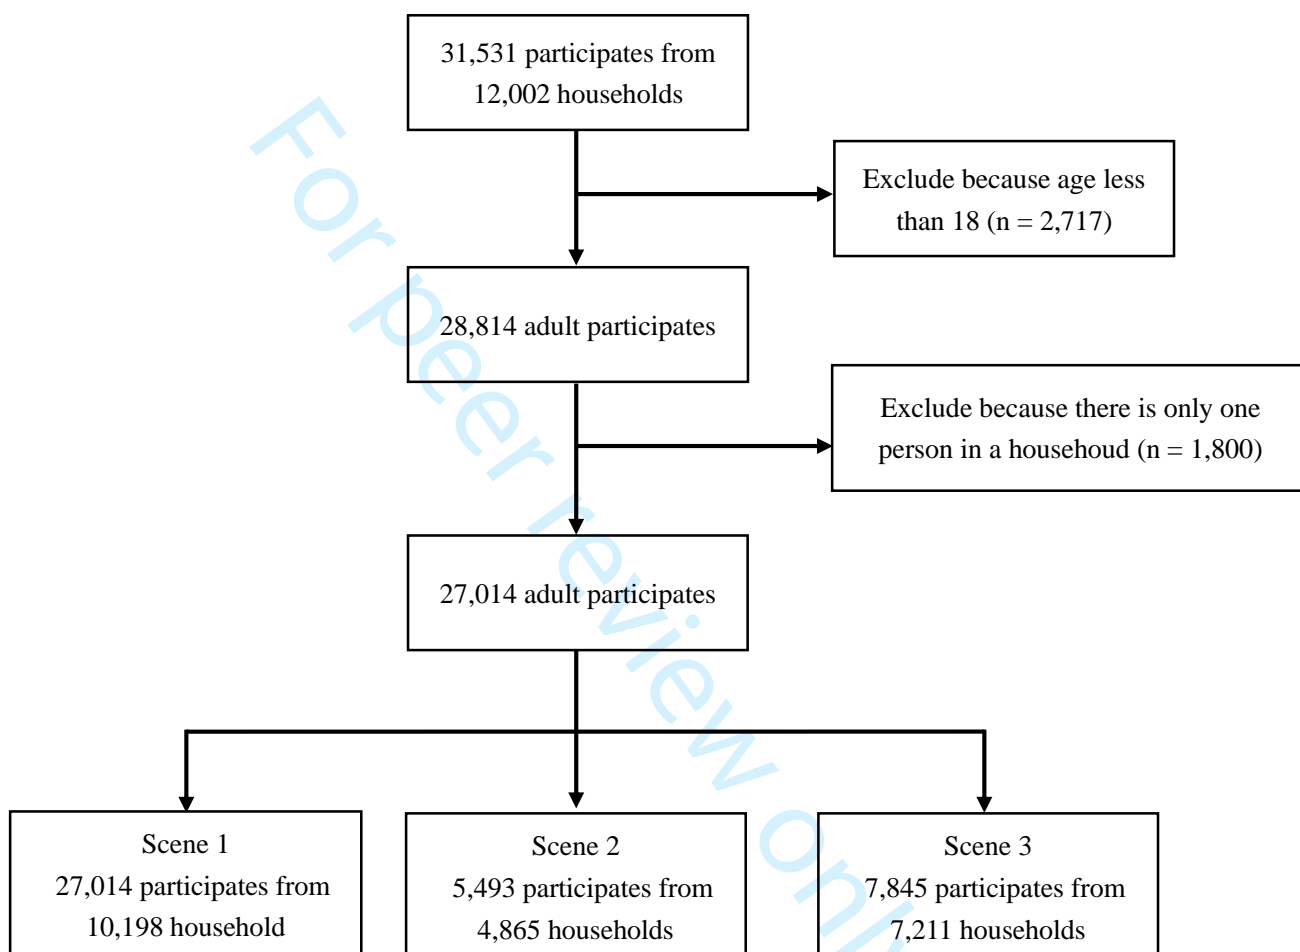

Notes: There were 4 participates missing in education status or marriage status in scene 1. There were 4 participates missing in education status or marriage status in scene 2. There was 1 participate missing in education status or marriage status in scene 3.

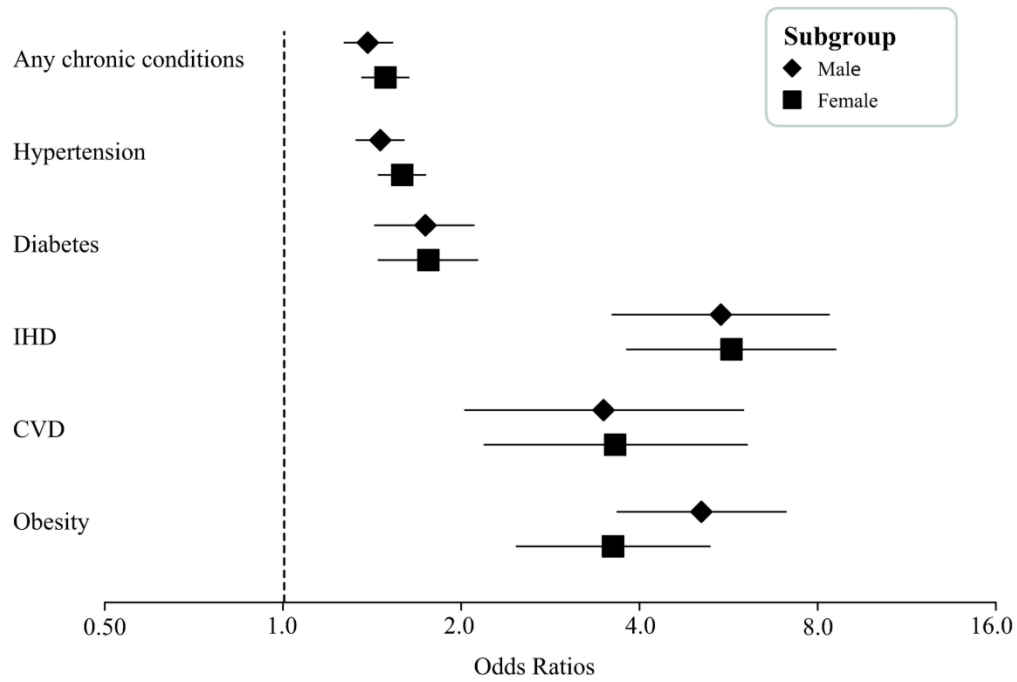

Figure 2 The forest plot of five chronic conditions subgroup analysis categorized by gender. The plot showed the adjusted odds ratios and 95% confidence interval of the association between each given chronic condition of individual with the same condition of household member.

171x115mm (300 x 300 DPI)

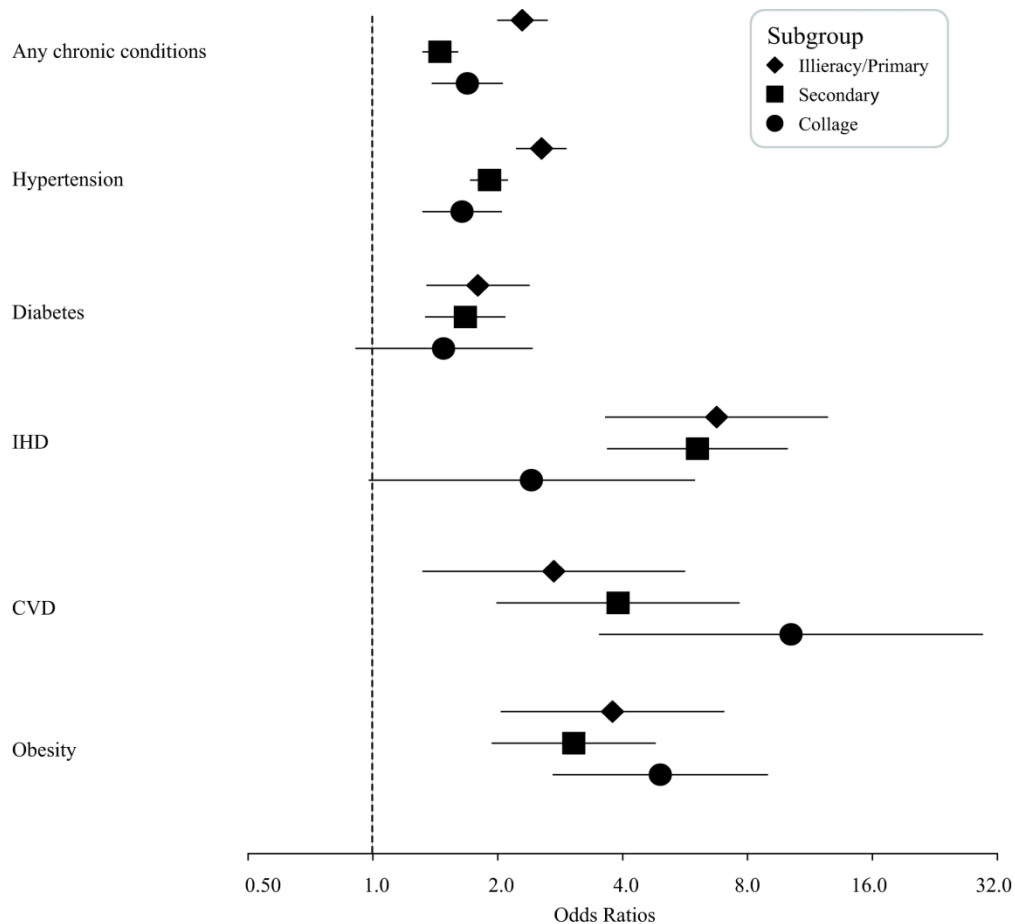

Figure 3 The forest plot of five chronic conditions subgroup analysis categorized by education status. The plot showed the adjusted odds ratios and 95% confidence interval of the association between each given chronic condition of individual with the same condition of household member.

204x187mm (300 x 300 DPI)

Table S1 The crude associations between one’s chronic conditions and the disease status of their own household members - Scene 1 (N = 27,010)

| Exposure:                                                | Any chronic conditions |        | Hypertension        |        | Diabetes            |        | IHD                  |        | CVD                 |        | Obesity             |        |
|----------------------------------------------------------|------------------------|--------|---------------------|--------|---------------------|--------|----------------------|--------|---------------------|--------|---------------------|--------|
| chronic condition status of any other household members. | OR (95% CI)            | P      | OR (95% CI)         | P      | OR (95% CI)         | P      | OR (95% CI)          | P      | OR (95% CI)         | P      | OR (95% CI)         | P      |
| Any chronic conditions                                   | 2.26<br>(2.26-3.81)    | <.0001 | 2.89<br>(2.69-3.10) | <.0001 | 1.49<br>(1.35-1.66) | <.0001 | 1.34<br>(1.09-1.65)  | 0.0050 | 1.35<br>(1.09-1.67) | 0.0059 | 1.30<br>(1.09-1.54) | 0.0029 |
| Hypertension                                             | 1.96<br>(1.07-3.57)    | 0.0282 | 1.65<br>(1.52-1.78) | <.0001 | 1.40<br>(1.27-1.55) | <.0001 | 1.51<br>(1.24-1.83)  | <.0001 | 1.06<br>(1.32-0.86) | 0.5683 | 1.02<br>(0.86-1.21) | 0.8048 |
| Diabetes                                                 | 1.36<br>(1.24-1.48)    | <.0001 | 1.14<br>(1.05-1.25) | 0.0031 | 1.73<br>(1.45-2.08) | <.0001 | 1.23<br>(0.93-1.63)  | 0.1493 | 1.29<br>(0.96-1.74) | 0.0910 | 1.44<br>(1.15-1.80) | 0.0015 |
| IHD                                                      | 1.40<br>(1.19-1.65)    | <.0001 | 1.40<br>(1.19-1.65) | <.0001 | 1.19<br>(0.88-1.59) | 0.2568 | 7.35<br>(5.04-10.72) | <.0001 | 2.06<br>(1.30-3.25) | 0.0019 | 0.89<br>(0.54-1.47) | 0.6472 |
| CVD                                                      | 1.20<br>(1.01-1.43)    | 0.0422 | 1.08<br>(0.89-1.29) | 0.4362 | 1.25<br>(0.95-1.66) | 0.1133 | 1.98<br>(1.26-3.13)  | 0.0032 | 4.45<br>(2.66-7.44) | <.0001 | 0.61<br>(0.31-1.18) | 0.1400 |
| Obesity                                                  | 1.22<br>(1.06-1.41)    | 0.0071 | 0.96<br>(0.83-1.11) | 0.5997 | 1.32<br>(1.07-1.64) | 0.0104 | 0.82<br>(0.50-1.36)  | 0.4434 | 0.58<br>(0.30-1.12) | 0.1056 | 3.43<br>(2.36-4.98) | <.0001 |

Note:  
The chronic conditions on the top of table represented the status of participants. The chronic conditions on the left of the table represented the status of any other household members.

Table S2 The adjusted associations of subgroup analyses in all adult household members

| Exposure:                                                | Any chronic conditions |        | Hypertension        |        | Diabetes            |        | IHD                 |        | CVD                 |        | Obesity             |        |
|----------------------------------------------------------|------------------------|--------|---------------------|--------|---------------------|--------|---------------------|--------|---------------------|--------|---------------------|--------|
| chronic condition status of any other household members. | OR (95% CI)            | P      | OR (95% CI)         | P      | OR (95% CI)         | P      | OR (95% CI)         | P      | OR (95% CI)         | P      | OR (95% CI)         | P      |
| <b>Male</b>                                              |                        |        |                     |        |                     |        |                     |        |                     |        |                     |        |
| Any chronic conditions                                   | 1.39<br>(1.27-1.53)    | <.0001 | 1.44<br>(1.31-1.57) | <.0001 | 1.22<br>(1.07-1.41) | 0.0044 | 1.14<br>(0.85-1.53) | 0.3852 | 1.14<br>(0.84-1.56) | 0.4038 | 1.10<br>(0.87-1.39) | 0.4386 |
| Hypertension                                             | 1.38<br>(1.26-1.26)    | <.0001 | 1.46<br>(1.33-1.60) | <.0001 | 1.21<br>(1.05-1.39) | 0.0070 | 1.04<br>(0.78-1.38) | 0.8069 | 0.88<br>(0.64-1.19) | 0.4061 | 1.03<br>(0.81-1.30) | 0.8218 |
| Diabetes                                                 | 1.47<br>(1.28-1.67)    | <.0001 | 1.31<br>(1.15-1.50) | <.0001 | 1.74<br>(1.43-2.10) | <.0001 | 1.18<br>(0.78-1.77) | 0.4359 | 1.33<br>(0.88-2.03) | 0.1776 | 1.51<br>(1.09-2.09) | 0.0123 |
| IHD                                                      | 1.12<br>(0.87-1.43)    | 0.3866 | 1.12<br>(0.87-1.45) | 0.3700 | 0.93<br>(0.63-1.39) | 0.7375 | 5.49<br>(3.60-8.36) | <.0001 | 1.45<br>(0.74-2.86) | 0.2764 | 0.70<br>(0.32-1.55) | 0.3791 |
| CVD                                                      | 0.93<br>(0.70-1.24)    | 0.6254 | 0.80<br>(0.59-1.08) | 0.1487 | 0.94<br>(0.61-1.46) | 0.7936 | 1.64<br>(0.84-3.22) | 0.1484 | 3.48<br>(2.03-5.99) | <.0001 | 0.73<br>(0.30-1.73) | 0.4709 |
| Obesity                                                  | 1.47<br>(1.18-1.82)    | 0.0005 | 1.31<br>(1.06-1.61) | 0.0115 | 1.27<br>(0.93-1.74) | 0.1271 | 1.04<br>(0.52-2.07) | 0.9131 | 0.87<br>(0.40-1.93) | 0.7368 | 5.09<br>(3.67-7.07) | <.0001 |
| <b>Female</b>                                            |                        |        |                     |        |                     |        |                     |        |                     |        |                     |        |
| Any chronic conditions                                   | 1.49<br>(1.36-1.63)    | <.0001 | 1.49<br>(1.36-1.63) | <.0001 | 1.39<br>(1.21-1.60) | <.0001 | 1.31<br>(1.01-1.71) | 0.0453 | 0.91<br>(0.68-1.22) | 0.5335 | 1.36<br>(1.08-1.71) | 0.0101 |
| Hypertension                                             | 1.49<br>(1.36-1.62)    | <.0001 | 1.59<br>(1.45-1.74) | <.0001 | 1.26<br>(1.10-1.45) | 0.0011 | 1.32<br>(1.02-1.71) | 0.0365 | 0.86<br>(0.64-1.15) | 0.3052 | 1.15<br>(0.92-1.45) | 0.2201 |



| Exposure:                                                | Any chronic conditions |        | Hypertension        |        | Diabetes            |        | IHD                  |        | CVD                 |        | Obesity             |        |
|----------------------------------------------------------|------------------------|--------|---------------------|--------|---------------------|--------|----------------------|--------|---------------------|--------|---------------------|--------|
| chronic condition status of any other household members. | OR (95% CI)            | P      | OR (95% CI)         | P      | OR (95% CI)         | P      | OR (95% CI)          | P      | OR (95% CI)         | P      | OR (95% CI)         | P      |
| Diabetes                                                 | 1.28<br>(1.12-1.46)    | 0.0002 | 1.28<br>(1.12-1.46) | 0.0003 | 1.76<br>(1.45-2.13) | <.0001 | 0.95<br>(0.65-1.40)  | 0.8038 | 0.95<br>(0.60-1.49) | 0.8158 | 1.32<br>(0.96-1.81) | 0.0902 |
| IHD                                                      | 1.06<br>(0.82-1.36)    | 0.6716 | 1.01<br>(0.78-1.31) | 0.9455 | 1.09<br>(0.75-1.59) | 0.6389 | 5.72<br>(3.81-8.58)  | <.0001 | 1.47<br>(0.75-2.87) | 0.2645 | 1.03<br>(0.52-2.01) | 0.9400 |
| CVD                                                      | 0.97<br>(0.74-1.26)    | 0.8189 | 0.83<br>(0.63-1.09) | 0.1782 | 1.16<br>(0.77-1.75) | 0.4648 | 1.43<br>(0.72-2.82)  | 0.3023 | 3.64<br>(2.19-6.08) | <.0001 | 0.52<br>(0.19-1.39) | 0.1907 |
| Obesity                                                  | 1.13<br>(0.90-1.42)    | 0.2994 | 1.00<br>(0.79-1.27) | 0.9974 | 1.52<br>(1.11-2.09) | 0.0100 | 0.65<br>(0.28-1.50)  | 0.3101 | 0.27<br>(0.06-1.11) | 0.0699 | 3.61<br>(2.48-5.26) | <.0001 |
| <b>Illiteracy/Primary</b>                                |                        |        |                     |        |                     |        |                      |        |                     |        |                     |        |
| Any chronic conditions                                   | 2.29<br>(2.00-2.63)    | <.0001 | 1.50<br>(1.31-1.71) | <.0001 | 1.16<br>(0.97-1.38) | 0.1064 | 0.95<br>(0.68-1.34)  | 0.7815 | 0.95<br>(0.70-1.29) | 0.7388 | 1.19<br>(0.85-1.67) | 0.3038 |
| Hypertension                                             | 1.77<br>(1.55-2.01)    | <.0001 | 2.55<br>(2.22-2.92) | <.0001 | 1.12<br>(0.94-1.33) | 0.2053 | 0.97<br>(0.70-1.35)  | 0.8688 | 0.99<br>(0.74-1.34) | 0.9727 | 1.00<br>(0.72-1.38) | 0.9855 |
| Diabetes                                                 | 1.20<br>(1.00-1.43)    | 0.0445 | 1.22<br>(1.03-1.44) | 0.0229 | 1.79<br>(1.35-2.38) | <.0001 | 0.70<br>(0.40-1.24)  | 0.2242 | 0.77<br>(0.48-1.26) | 0.3011 | 1.18<br>(0.72-1.93) | 0.5080 |
| IHD                                                      | 1.05<br>(0.74-1.48)    | 0.7975 | 0.97<br>(0.70-1.36) | 0.8720 | 0.86<br>(0.48-1.54) | 0.6177 | 6.74<br>(3.64-12.46) | <.0001 | 2.03<br>(1.05-3.92) | 0.0360 | 1.26<br>(0.48-3.36) | 0.6389 |
| CVD                                                      | 0.94<br>(0.68-1.29)    | 0.6994 | 0.85<br>(0.62-1.17) | 0.3135 | 0.83<br>(0.50-1.39) | 0.4814 | 1.86<br>(0.91-3.80)  | 0.0883 | 2.73<br>(1.32-5.64) | 0.0066 | 1.17<br>(0.49-2.81) | 0.7180 |

1  
2  
3  
4

| Exposure:                                                | Any chronic conditions |        | Hypertension        |        | Diabetes            |        | IHD                 |        | CVD                 |        | Obesity             |        |
|----------------------------------------------------------|------------------------|--------|---------------------|--------|---------------------|--------|---------------------|--------|---------------------|--------|---------------------|--------|
| chronic condition status of any other household members. | OR (95% CI)            | P      | OR (95% CI)         | P      | OR (95% CI)         | P      | OR (95% CI)         | P      | OR (95% CI)         | P      | OR (95% CI)         | P      |
| Obesity                                                  | 1.20<br>(0.91-1.58)    | 0.2047 | 1.07<br>(0.81-1.40) | 0.6397 | 1.46<br>(1.01-2.13) | 0.0450 | 1.02<br>(0.45-2.32) | 0.9649 | 0.62<br>(0.25-1.54) | 0.3065 | 3.78<br>(2.04-7.01) | <.0001 |
| <b>Secondary</b>                                         |                        |        |                     |        |                     |        |                     |        |                     |        |                     |        |
| Any chronic conditions                                   | 1.45<br>(1.32-1.60)    | <.0001 | 1.43<br>(1.29-1.58) | <.0001 | 1.37<br>(1.20-1.58) | <.0001 | 1.36<br>(1.02-1.83) | 0.0349 | 0.97<br>(0.69-1.37) | 0.8698 | 0.98<br>(0.78-1.24) | 0.8892 |
| Hypertension                                             | 1.34<br>(1.22-1.48)    | <.0001 | 1.91<br>(1.72-2.11) | <.0001 | 1.32<br>(1.16-1.51) | <.0001 | 1.37<br>(1.03-1.81) | 0.0287 | 0.76<br>(0.53-1.08) | 0.1227 | 1.00<br>(0.80-1.25) | 0.9899 |
| Diabetes                                                 | 1.19<br>(1.04-1.36)    | 0.0090 | 1.29<br>(1.13-1.46) | 0.0001 | 1.67<br>(1.34-2.08) | <.0001 | 1.28<br>(0.87-1.90) | 0.2140 | 1.61<br>(1.02-2.53) | 0.0395 | 1.40<br>(1.03-1.90) | 0.0331 |
| IHD                                                      | 1.05<br>(0.82-1.33)    | 0.7096 | 1.11<br>(0.86-1.42) | 0.4324 | 0.95<br>(0.65-1.39) | 0.7949 | 6.06<br>(3.68-9.97) | <.0001 | 0.81<br>(0.32-2.06) | 0.6626 | 0.51<br>(0.21-1.20) | 0.1231 |
| CVD                                                      | 0.93<br>(0.70-1.22)    | 0.5950 | 0.83<br>(0.62-1.12) | 0.2354 | 1.33<br>(0.90-1.96) | 0.1528 | 0.81<br>(0.32-2.04) | 0.6586 | 3.90<br>(1.99-7.63) | <.0001 | 0.24<br>(0.06-0.98) | 0.0467 |
| Obesity                                                  | 1.32<br>(1.06-1.64)    | 0.0132 | 1.14<br>(0.92-1.41) | 0.2223 | 1.28<br>(0.95-1.71) | 0.1041 | 0.73<br>(0.34-1.57) | 0.4245 | 0.67<br>(0.24-1.86) | 0.4398 | 3.05<br>(1.94-4.79) | <.0001 |
| <b>Collage</b>                                           |                        |        |                     |        |                     |        |                     |        |                     |        |                     |        |
| Any chronic conditions                                   | 1.69<br>(1.39-2.05)    | <.0001 | 1.55<br>(1.25-1.91) | <.0001 | 1.14<br>(0.83-1.58) | 0.4111 | 1.05<br>(0.63-1.75) | 0.8497 | 1.12<br>(0.56-2.23) | 0.7439 | 1.82<br>(1.25-2.67) | 0.0003 |

32  
33  
34  
35  
36  
37  
38  
39  
40  
41  
42  
43  
44  
45  
46

1  
2  
3  
4

| Exposure:                                                | Any chronic conditions |        | Hypertension        |        | Diabetes            |        | IHD                 |        | CVD                   |        | Obesity             |         |
|----------------------------------------------------------|------------------------|--------|---------------------|--------|---------------------|--------|---------------------|--------|-----------------------|--------|---------------------|---------|
| chronic condition status of any other household members. | OR (95% CI)            | P      | OR (95% CI)         | P      | OR (95% CI)         | P      | OR (95% CI)         | P      | OR (95% CI)           | P      | OR (95% CI)         | P       |
| Hypertension                                             | 1.43<br>(1.19-1.73)    | 0.0002 | 1.64<br>(1.32-2.04) | <.0001 | 1.17<br>(0.85-1.61) | 0.3432 | 0.93<br>(0.56-1.53) | 0.7628 | 0.67<br>(0.33-1.36)   | 0.2673 | 1.62<br>(1.12-2.33) | 0.0103  |
| Diabetes                                                 | 1.70<br>(1.33-2.16)    | <.0001 | 1.60<br>(1.22-2.09) | 0.0007 | 1.48<br>(0.91-2.42) | 0.1169 | 1.23<br>(0.63-2.41) | 0.5452 | 1.22<br>(0.51-2.93)   | 0.6546 | 1.69<br>(1.08-2.65) | 0.0220  |
| IHD                                                      | 1.14<br>(0.75-1.73)    | 0.5444 | 1.02<br>(0.64-1.63) | 0.9371 | 1.28<br>(0.69-2.39) | 0.4309 | 2.41<br>(0.98-5.96) | 0.0557 | 1.68<br>(0.58-4.87)   | 0.3376 | 1.58<br>(0.67-3.70) | 0.2928  |
| CVD                                                      | 1.20<br>(0.69-2.09)    | 0.5079 | 0.72<br>(0.37-1.39) | 0.3256 | 0.57<br>(0.20-1.62) | 0.2923 | 2.32<br>(0.85-6.28) | 0.0988 | 10.19<br>(3.52-29-46) | <.0001 | 0.88<br>(0.21-3.64) | 0.8569  |
| Obesity                                                  | 2.34<br>(1.52-3.60)    | 0.0001 | 1.51<br>(0.94-2.42) | 0.0848 | 1.70<br>(0.78-3.71) | 0.1829 | 0.83<br>(0.18-3.93) | 0.8179 | -                     | -      | 4.93<br>(2.72-8.93) | <0.0001 |

Note:  
 The chronic conditions on the top of table represented the status of participants. The chronic conditions on the left of the table represented the status of any other household members. The generalized estimating equations (GEE) model was adjusted for age, gender, health insurance status, education status, marriage status, drinking and smoking. The adjusted GEE model was not fit for estimate the association between CVD and obesity in the “Collage” subgroup.

31  
32  
33  
34  
35  
36  
37  
38  
39  
40  
41  
42  
43  
44  
45  
46

Table S3 The crude associations of chronic conditions between children and their own parents - Scene 2 (N = 5,489 dyads)

| Exposure:                           | Any chronic conditions |        | Hypertension    |        | Diabetes          |        | Obesity           |        |
|-------------------------------------|------------------------|--------|-----------------|--------|-------------------|--------|-------------------|--------|
| chronic condition status of parents | OR (95% CI)            | P      | OR (95% CI)     | P      | OR (95% CI)       | P      | OR (95% CI)       | P      |
| Any chronic conditions              | 5.85(4.83-7.09)        | <.0001 | 6.60(5.25-8.28) | <.0001 | 6.36(3.98-10.18)  | <.0001 | 2.91(2.01-4.20)   | <.0001 |
| Hypertension                        | 4.52(3.77-5.41)        | <.0001 | 7.14(5.73-8.90) | <.0001 | 3.32(2.24-4.90)   | <.0001 | 1.61(1.13-2.29)   | 0.0085 |
| Diabetes                            | 2.26(1.78-2.87)        | <.0001 | 1.75(1.27-2.41) | 0.0007 | 11.28(7.65-16.62) | <.0001 | 1.57(0.93-2.67)   | 0.0941 |
| Obesity                             | 3.09(2.07-4.60)        | <.0001 | 0.82(0.39-1.73) | 0.6037 | 1.98(0.79-4.94)   | 0.1449 | 14.88(9.35-23.68) | <.0001 |

Note:

The chronic conditions on the top of table represented the status of children. The chronic conditions on the left of the table represented the status of their parents.

The analyses of IHD and CVD were not conducted because of low prevalence rate in this subset.

Table S4 The crude associations of chronic conditions between wife and their own husband - Scene 3 (N = 7,844 spouses)

| Exposure:                                                | Any chronic conditions |        | Hypertension        |        | Diabetes            |        | IHD                    |        | CVD                   |        | Obesity             |        |
|----------------------------------------------------------|------------------------|--------|---------------------|--------|---------------------|--------|------------------------|--------|-----------------------|--------|---------------------|--------|
| chronic condition status of any other household members. | OR (95% CI)            | P      | OR (95% CI)         | P      | OR (95% CI)         | P      | OR (95% CI)            | P      | OR (95% CI)           | P      | OR (95% CI)         | P      |
| Any chronic conditions                                   | 2.88<br>(2.61-3.18)    | <.0001 | 2.80<br>(2.53-3.10) | <.0001 | 2.35<br>(1.96-2.82) | <.0001 | 3.41<br>(2.32-5.02)    | <.0001 | 1.82<br>(1.24-2.67)   | 0.0022 | 1.65<br>(1.20-2.26) | 0.0020 |
| Hypertension                                             | 2.91<br>(2.63-3.22)    | <.0001 | 2.94<br>(2.65-3.26) | <.0001 | 2.31<br>(1.93-2.78) | <.0001 | 3.30<br>(2.27-4.80)    | <.0001 | 1.62<br>(1.10-2.38)   | 0.0147 | 1.39<br>(1.01-1.93) | 0.0453 |
| Diabetes                                                 | 2.09<br>(1.78-2.46)    | <.0001 | 1.97<br>(1.67-2.33) | <.0001 | 2.12<br>(1.64-2.75) | <.0001 | 2.51<br>(1.55-4.05)    | 0.0002 | 0.92<br>(0.44-1.89)   | 0.8143 | 1.20<br>(0.70-2.06) | 0.5082 |
| IHD                                                      | 2.84<br>(2.01-4.01)    | <.0001 | 2.54<br>(1.80-3.59) | <.0001 | 2.38<br>(1.44-3.95) | 0.0008 | 18.21<br>(11.18-29.63) | <.0001 | 5.01<br>(2.39-10.53)  | <.0001 | 1.55<br>(0.57-4.26) | 0.3911 |
| CVD                                                      | 2.91<br>(2.01-4.19)    | <.0001 | 2.18<br>(1.51-3.15) | <.0001 | 2.02<br>(1.15-3.55) | 0.0150 | 3.68<br>(1.58-8.53)    | 0.0025 | 10.16<br>(5.51-18.73) | <.0001 | 1.75<br>(0.64-4.80) | 0.2782 |
| Obesity                                                  | 1.02<br>(0.74-1.39)    | 0.9177 | 0.73<br>(0.51-1.04) | 0.0822 | 1.42<br>(0.84-2.38) | 0.1863 | 0.72<br>(0.18-2.94)    | 0.6484 | 0.39<br>(0.05-2.83)   | 0.3542 | 4.72<br>(2.7108.22) | <.0001 |

Note:

The chronic conditions on the top of table represented the status of wives. The chronic conditions on the left of the table represented the status of their husband.

Table S5 The results of full models for the association between chronic conditions of individual with the same condition of household member

| Factors                       | Subsample1      |         | Subsample2        |         | Subsample3      |         |
|-------------------------------|-----------------|---------|-------------------|---------|-----------------|---------|
|                               | OR(95%CI)       | P       | OR(95%CI)         | P       | OR(95%CI)       | P       |
| <b>Any chronic conditions</b> |                 |         |                   |         |                 |         |
| Same condition                | 3.03(2.81-3.28) | <0.0001 | 5.13(4.20-6.28)   | <0.0001 | 1.58(1.41-1.77) | <0.0001 |
| Age                           | 1.07(1.07-1.07) | <0.0001 | 1.08(1.08-1.09)   | <0.0001 | 1.08(1.07-1.08) | <0.0001 |
| Sex                           |                 |         |                   |         |                 |         |
| Female                        | Ref             |         | Ref               |         | -               | -       |
| Male                          | 1.16(1.07-1.26) | 0.0002  | 1.48(1.17-1.88)   | 0.0010  | -               | -       |
| Health insurance status       |                 |         |                   |         |                 |         |
| Insuranced                    | Ref             |         | Ref               |         | Ref             |         |
| No insuranced                 | 0.82(0.74-0.91) | 0.0001  | 1.02(0.62-1.68)   | 0.9319  | 1.08(0.78-1.49) | 0.6577  |
| Education status              |                 |         |                   |         |                 |         |
| Illieracy/Primary             | Ref             |         |                   |         |                 |         |
| Secenary                      | 1.22(1.11-1.34) | <0.0001 | 1.54(1.07-2.21)   | 0.0204  | 1.91(1.54-2.37) | <0.0001 |
| Collage                       | 1.34(1.23-1.45) | <0.0001 | 1.44(1.13-1.83)   | 0.0028  | 1.74(1.43-2.12) | <0.0001 |
| Smoking                       | 1.00(0.91-1.09) | 0.9306  | 1.19(0.92-1.53)   | 0.1781  | 1.01(0.70-1.48) | 0.9386  |
| Drinking                      | 0.85(0.78-0.93) | 0.0002  | 0.89(0.70-1.13)   | 0.3515  | 1.20(0.85-1.70) | 0.3001  |
| <b>Hypertension</b>           |                 |         |                   |         |                 |         |
| Same condition                | 3.26(3.02-3.52) | <0.0001 | 6.29(4.92-8.05)   | <0.0001 | 1.63(1.45-1.84) | <0.0001 |
| Age                           | 1.07(1.07-1.07) | <0.0001 | 1.12(1.11-1.13)   | <0.0001 | 1.08(1.07-1.08) | <0.0001 |
| Sex                           |                 |         |                   |         |                 |         |
| Female                        | Ref             |         | Ref               |         | -               | -       |
| Male                          | 1.10(1.01-1.20) | 0.0247  | 1.26(0.94-1.70)   | 0.1247  | -               | -       |
| Health insurance status       |                 |         |                   |         |                 |         |
| Insuranced                    | Ref             |         | Ref               |         | Ref             |         |
| No insuranced                 | 0.98(0.87-1.11) | 0.7680  | 0.73(0.39-1.37)   | 0.3310  | 0.98(0.70-1.37) | 0.9004  |
| Education status              |                 |         |                   |         |                 |         |
| Illieracy/Primary             | Ref             |         | Ref               |         | Ref             |         |
| Secenary                      | 1.32(1.20-1.45) | <0.0001 | 1.56(1.01-2.41)   | 0.0435  | 1.92(1.53-2.40) | <0.0001 |
| Collage                       | 1.39(1.28-1.51) | <0.0001 | 1.50(1.10-2.03)   | 0.0093  | 1.76(1.42-2.17) | <0.0001 |
| Smoking                       | 1.03(0.94-1.13) | 0.5309  | 1.13(0.84-1.53)   | 0.4109  | 1.11(0.75-1.65) | 0.6052  |
| Drinking                      | 0.77(0.70-0.84) | <0.0001 | 0.71(0.54-0.94)   | 0.0166  | 1.22(0.85-1.75) | 0.2834  |
| <b>Diabetes</b>               |                 |         |                   |         |                 |         |
| Same condition                | 1.68(1.40-2.01) | <0.0001 | 11.56(7.88-16.98) | <0.0001 | 1.57(1.21-2.03) | 0.0007  |
| Age                           | 1.05(1.04-1.06) | <0.0001 | 1.08(1.06-1.10)   | <0.0001 | 1.05(1.05-1.06) | <0.0001 |
| Sex                           |                 |         |                   |         |                 |         |
| Female                        | Ref             |         | Ref               |         | -               | -       |
| Male                          | 1.05(0.91-1.20) | 0.5013  | 1.45(0.88-2.37)   | 0.1409  | -               | -       |
| Health insurance status       |                 |         |                   |         |                 |         |
| Insuranced                    | Ref             |         | Ref               |         |                 |         |

|    |                         |                 |         |                   |         |                  |         |
|----|-------------------------|-----------------|---------|-------------------|---------|------------------|---------|
| 1  | No insureded            | 0.29(0.06-1.48) | 0.1362  | 0.94(0.30-2.93)   | 0.9158  | 0.86(0.46-1.59)  | 0.6258  |
| 2  | Education status        |                 |         |                   |         |                  |         |
| 3  | Illieracy/Primary       | Ref             |         | Ref               |         | Ref              |         |
| 4  | Seconary                | 1.00(0.79-1.27) | 0.9867  | 2.34(1.04-5.27)   | 0.0410  | 2.23(1.41-3.53)  | 0.0006  |
| 5  | Collage                 | 1.35(1.17-1.55) | <0.0001 | 2.66(1.45-4.87)   | 0.0016  | 2.15(1.40-3.31)  | 0.0005  |
| 6  | Smoking                 | 0.84(0.73-0.96) | 0.0130  | 1.17(0.73-1.89)   | 0.5071  | 0.72(0.41-1.29)  | 0.2728  |
| 7  | Drinking                | 1.12(0.98-1.29) | 0.0943  | 1.11(0.69-1.79)   | 0.6780  | 1.32(0.69-2.53)  | 0.4069  |
| 8  |                         |                 |         |                   |         |                  |         |
| 9  |                         |                 |         |                   |         |                  |         |
| 10 | IHD                     |                 |         |                   |         |                  |         |
| 11 | Same condition          | 5.31(3.56-7.92) | <0.0001 | -                 | -       | 6.58(3.78-11.43) | <0.0001 |
| 12 | Age                     | 1.06(1.05-1.07) | <0.0001 | -                 | -       | 1.11(1.09-1.12)  | <0.0001 |
| 13 | Sex                     |                 |         |                   |         |                  |         |
| 14 | Female                  | Ref             |         | Ref               |         | -                | -       |
| 15 | Male                    | 0.85(0.64-1.12) | 0.2523  | -                 | -       | -                | -       |
| 16 | Health insurance status |                 |         |                   |         |                  |         |
| 17 | Insureded               | Ref             |         | Ref               |         | Ref              |         |
| 18 | No insureded            | 0.52(0.16-1.69) | 0.2753  | -                 | -       | 1.39(0.41-4.73)  | 0.5993  |
| 19 | Education status        |                 |         |                   |         |                  |         |
| 20 | Illieracy/Primary       | Ref             |         |                   |         |                  |         |
| 21 | Seconary                | 0.60(0.43-0.84) | 0.0025  | -                 | -       | 0.39(0.20-0.78)  | 0.0072  |
| 22 | Collage                 | 0.87(0.70-1.10) | 0.2495  | -                 | -       | 0.88(0.47-1.65)  | 0.6853  |
| 23 | Smoking                 | 1.10(0.83-1.46) | 0.5087  | -                 | -       | 2.16(0.28-16.40) | 0.4584  |
| 24 | Drinking                | 1.09(0.81-1.46) | 0.5672  | -                 | -       | 0.42(0.18-0.98)  | 0.0458  |
| 25 |                         |                 |         |                   |         |                  |         |
| 26 |                         |                 |         |                   |         |                  |         |
| 27 | CVD                     |                 |         |                   |         |                  |         |
| 28 | Same condition          | 3.40(1.99-5.80) | <0.0001 | -                 | -       | 3.62(1.86-7.07)  | 0.0002  |
| 29 | Age                     | 1.08(1.07-1.09) | <0.0001 | -                 | -       | 1.10(1.08-1.12)  | <0.0001 |
| 30 | Sex                     |                 |         |                   |         |                  |         |
| 31 | Female                  | Ref             |         | Ref               |         | -                | -       |
| 32 | Male                    | 1.20(0.94-1.54) | 0.1491  | -                 | -       | -                | -       |
| 33 | Health insurance status |                 |         |                   |         |                  |         |
| 34 | Insureded               | Ref             |         | Ref               |         | Ref              |         |
| 35 | No insureded            | 0.73(0.38-1.40) | 0.3380  | -                 | -       | 1.23(0.35-4.31)  | 0.7483  |
| 36 | Education status        |                 |         |                   |         |                  |         |
| 37 | Illieracy/Primary       | Ref             |         | Ref               |         | Ref              |         |
| 38 | Seconary                | 1.59(1.13-2.24) | 0.0072  | -                 | -       | 1.25(0.55-2.81)  | 0.5940  |
| 39 | Collage                 | 1.24(0.90-1.72) | 0.1899  | -                 | -       | 1.15(0.51-2.60)  | 0.7410  |
| 40 | Smoking                 | 1.34(0.97-1.84) | 0.0781  | -                 | -       | 1.61(0.21-12.13) | 0.6429  |
| 41 | Drinking                | 1.32(0.96-1.80) | 0.0867  | -                 | -       | 2.57(0.34-19.52) | 0.3603  |
| 42 |                         |                 |         |                   |         |                  |         |
| 43 |                         |                 |         |                   |         |                  |         |
| 44 | Obesity                 |                 |         |                   |         |                  |         |
| 45 | Same condition          | 3.41(2.34-4.96) | <0.0001 | 13.85(8.54-22.46) | <0.0001 | 5.09(2.92-8.86)  | <0.0001 |
| 46 | Age                     | 1.01(1.00-1.02) | 0.0462  | 1.00(0.98-1.02)   | 0.8932  | 1.02(1.01-1.04)  | 0.0015  |
| 47 | Sex                     |                 |         |                   |         |                  |         |
| 48 | Female                  | Ref             |         | Ref               |         | -                | -       |
| 49 | Male                    | 1.08(0.88-1.33) | 0.4682  | 2.04(1.31-3.17)   | 0.0017  | -                | -       |

## Health insurance status

|    |                   |                 |        |                 |        |                 |        |
|----|-------------------|-----------------|--------|-----------------|--------|-----------------|--------|
| 1  | Insuranced        | Ref             |        | Ref             |        | Ref             |        |
| 2  |                   |                 |        |                 |        |                 |        |
| 3  | No insuranced     | 0.37(0.06-2.09) | 0.2588 | 1.18(0.55-2.53) | 0.6670 | 1.56(0.72-3.41) | 0.2630 |
| 4  | Education status  |                 |        |                 |        |                 |        |
| 5  |                   |                 |        |                 |        |                 |        |
| 6  | Illieracy/Primary | Ref             |        | Ref             |        | Ref             |        |
| 7  | Seconary          | 0.87(0.56-1.35) | 0.5298 | 1.08(0.44-2.64) | 0.8624 | 2.06(0.98-4.32) | 0.0558 |
| 8  |                   |                 |        |                 |        |                 |        |
| 9  | Collage           | 1.04(0.81-1.34) | 0.7469 | 1.27(0.82-1.98) | 0.2858 | 2.11(1.06-4.20) | 0.0339 |
| 10 | Smoking           | 1.11(0.89-1.39) | 0.3468 | 1.14(0.69-1.89) | 0.6041 | 1.22(0.38-3.86) | 0.7376 |
| 11 |                   |                 |        |                 |        |                 |        |
| 12 | Drinking          | 1.02(0.82-1.26) | 0.8914 | 1.47(0.83-2.58) | 0.1846 | 0.89(0.37-2.17) | 0.8004 |

For peer review only



# Statistical Analysis Plan

## Study design and background

From 1993 to 2013, the NHSS has been conducted for five times (every five years) which is a cross-sectional survey. The latest one was conducted in 2013, which was the fifth one. The 5<sup>th</sup> Health Service Survey of Shanghai was the extension of 5<sup>th</sup> NHSS. This survey was organized and conducted by the Shanghai Municipal Commission Health and Family Planning. The sampling method and quality assurance measures used in Shanghai survey were consistent with the national sampling approach and principle. The 5<sup>th</sup> Health Service Survey of Shanghai cover all of the 17 districts in Shanghai, and a three-stage, stratified, random sampling method was adopted. First stage, 100 towns/townships were selected randomly from all these 17 districts. Second stage, one thousand villages/communities were sampled randomly from these selected towns/townships. Third stage, about 12,000 households were identified randomly.

A face-to-face interview approach using structured household questionnaire, which was developed by the National Commission Health and Family Planning of China, was conducted for each household. The questionnaire contained the general information of household, the demographic characteristics of residents, the relationship of household members, self-reported illness and injury, outpatient and inpatient information.

To ensure the quality of this survey, some quality assurance measures were applied during the process of data collection. Logic errors would be checked among the data by survey constitutors. If there were logic errors, the investigators would contact the household members and verify the relevant information. The accuracy of data information were assessed by revisit-approach. The investigators revisited 5% of the sampled households and collected ten key questions to check the consistency of the information recorded. The consistency rates between these two visits was near to 99 %.

## Objective

The aim of our study is to estimate the association between an adult's own chronic condition status and the chronic condition status of other household members.

## Data management

Those who meet the following conditions will be excluded.

1. Residents less than 18 years old
2. Only one person in a household

Because the NHSS of Shanghai conducted well, there is little data missing in the data set. If one resident missed some important variables, he/she will be excluded from analyses.

## Outcomes

We choose five chronic conditions with high prevalence in this survey: hypertension, diabetes, ischemic heart disease (IHD), cerebrovascular disease (CVD), and obesity. The definition of these chronic conditions is based on the question in the questionnaire,

1  
2  
3 the disease coding list of the NHSS, and Body mass index (BMI).

4 **Hypertension:** Hypertension for every resident is indicated based on the question in  
5 the questionnaire “Have you ever been told by a doctor that you have hypertension”. If  
6 one choose “YES”, the hypertension status of the participant is “1”. If the one choose  
7 “NO”, the hypertension status of the participant is “0”.

8  
9 **Diabetes:** Diabetes for every resident is indicated based on the question in the  
10 questionnaire “Have you ever been told by a doctor that you have diabetes”. If one  
11 choose “YES”, the diabetes status of the participant is “1”. If the one choose “NO”, the  
12 diabetes status of the participant is “0”.

13  
14 **IHD:** The questionnaire will record all of the chronic diseases for every resident, and  
15 these chronic diseases will be encoded in accordance with the disease coding list of  
16 the NHSS. IHD included angina pectoris (061), myocardial infarction (062), and other  
17 ischemic heart disease (063). If one choose any of these three codes, the IHD status of  
18 the participant is “1”. If the one did not choose any of these three codes, the IHD status  
19 of the participant is “0”.

20  
21 **CVD:** This chronic condition will be indicated according to the disease coding list of  
22 the NHSS: cerebrovascular disease (067). If one choose this code, the CVD status of  
23 the participant is “1”. If the one did not choose this code, the CVD status of the  
24 participant is “0”.

25  
26 **Obesity:** Body mass index (BMI) will be calculated for every resident by height and  
27 weight. Obesity was indicated by the World Health Organization (WHO) International  
28 BMI categories ( $BMI \geq 30 \text{ kg/m}^2$ ). If the BMI of the one is equal or over  $30 \text{ kg/m}^2$ , the  
29 obesity status of the participant is “1”. If the BMI of the one is lower than  $30 \text{ kg/m}^2$ , the  
30 obesity status of the participant is “0”.

31  
32 **Any chronic conditions:** If any of these five chronic conditions is “Yes” for a  
33 participant, his or her status of “Any chronic conditions” is “Yes”, otherwise “Any  
34 chronic conditions” is “No”

### 35 36 37 38 39 **Covariates**

40  
41 Socio-demographic characteristics added to our models as covariates include age  
42 (continuously specified in years), education status (illiteracy/primary, secondary or  
43 college), health insurance status (yes or no), marriage status (married, unmarried,  
44 divorced or widowed), smoking (yes or no), and drinking (yes or no). Except the  
45 analyses of spouse subsample, gender (male or female) and is also included as a  
46 covariate.

### 47 48 49 **Subsamples**

50  
51 To make a comprehensive estimation for the association, we conduct the analyses in  
52 three subsamples: all adult household members, adult children, and wives.

53  
54 **Subsample 1 all adult household members:** We can estimate the general association  
55 between an adult’s own chronic condition status and the chronic condition status of  
56 other household members based on this subsample. The chronic condition status of  
57 participant is treated as outcome, and the household situation of chronic condition for  
58 each participant is treated as exposure factor. If any other residents (excluding self)  
59  
60

1  
2  
3 have the given chronic conditions, the exposure for the one is “YES”.

4 **Subsample 2 adult children:** We only include adult children (age > 18 years old) in  
5 this subsample, and those participants are excluded if the disease information of parents  
6 were not available. The chronic conditions status of their parents are considered as  
7 exposure, and the chronic condition status of adult children is treated as outcome. If  
8 any of the one’s parents have the given chronic conditions, the exposure for the one is  
9 “YES”. The results of this subsample might show the effect of genetic factors and  
10 common living environment in the relationships that we are interested in.

11 **Subsample 3 wives:** we include married women in the analyses. We define the chronic  
12 condition of wife as the outcome and the chronic condition of husband as the exposure.  
13 The results of this subsample might show the effect of common living environment  
14 without genetic ties in the relationships that we are interested in.  
15  
16  
17  
18  
19  
20

## 21 **Statistical analysis**

### 22 **Descriptive analyses**

23 Descriptive statistics are summarized for the covariates of three subsamples,  
24 respectively. Mean (standard deviation, SD) is calculated for continuous variables, and  
25 counts (percentages) are calculated for categorical variables.  
26  
27

### 28 **Generalized Estimating Equations**

29 The generalized estimating equations (GEE) model with logit link will be used to find  
30 out the relationship between one’s chronic conditions and the others with chronic  
31 conditions living in the same household. We consider two-level hierarchical structure  
32 of the model (individual within household), and choose the exchangeable working  
33 correlation matrix for GEE model. The GEE model is performed using “GENMOD”  
34 procedure in SAS software. The analyses model is based on individual’s data without  
35 considering sampling weight, because there is no relevant information.  
36  
37

38 The adjusted GEE models will include age, gender, health insurance status, education  
39 status, drinking and smoking (gender is excluded in the third subsample). The chronic  
40 condition status of participants is included in models as independent variable. And the  
41 exposure (status of other members) is included in models as dependent variable. The  
42 final conclusion will be based on the results of the adjusted models.  
43  
44

45 The odds ratio (OR) and 95% confidence interval (CI) are estimated by GEE model to  
46 indicate the association between any chronic condition or each given chronic condition  
47 of individual with the same condition of household member (e.g., the association  
48 between the hypertensive status of a participants and that same condition in his or her  
49 other household members). And the association of different chronic condition will also  
50 be assessed (e.g., the association between hypertension in a participant and diabetes in  
51 other household members).  
52  
53

### 54 **Sensitivity analysis**

55 We will also estimate the unadjusted odds ratio and 95% confidence interval as  
56 sensitivity analysis. And the unadjusted results are required by the STROBE checklist.  
57

### 58 **Subgroup analysis**

59 We plan to perform two subgroup analysis. One is by gender (male or female) and the  
60

1  
2  
3 other is by education status (illiteracy/primary, secondary or collage). Illiteracy/primary  
4 means the education years were from 0 to 5 years, secondary means the education years  
5 were from 6 to 12 years, and collage means the education years of residents were higher  
6 than 12 years including undergraduate and graduate degrees. The reason why we  
7 perform this two subgroup analysis is this two factors may have a significant influence  
8 on living habits which is the cause of chronic conditions.  
9

### 10 **Other information**

11 All data management and statistical analyses will be performed using SAS software  
12 (version 9.4; SAS Institute Inc., Cary, NC). All reported p values are two-sided and p  
13 value < 0.05 is regarded as statistically significant. This study will be reported  
14 according to the Strengthening the Reporting of Observational studies in Epidemiology  
15 (STROBE) guidelines.  
16  
17  
18  
19  
20  
21  
22  
23  
24  
25  
26  
27  
28  
29  
30  
31  
32  
33  
34  
35  
36  
37  
38  
39  
40  
41  
42  
43  
44  
45  
46  
47  
48  
49  
50  
51  
52  
53  
54  
55  
56  
57  
58  
59  
60

1  
2  
3  
4  
5  
6  
7  
8  
9  
10  
11  
12  
13  
14  
15  
16  
17  
18  
19  
20  
21  
22  
23  
24  
25  
26  
27  
28  
29  
30  
31  
32  
33  
34  
35  
36  
37  
38  
39  
40  
41  
42  
43  
44  
45  
46  
47  
48  
49  
50  
51  
52  
53  
54  
55  
56  
57  
58  
59  
60

## Supplementary S1 The STROBE checklist

STROBE Statement—Checklist of items that should be included in reports of *cross-sectional studies*

|                           | <b>Item No</b> | <b>Recommendation</b>                                                                                                           | <b>Check</b>                                                                                                                                                                                                                                    | <b>Page</b>        |
|---------------------------|----------------|---------------------------------------------------------------------------------------------------------------------------------|-------------------------------------------------------------------------------------------------------------------------------------------------------------------------------------------------------------------------------------------------|--------------------|
| <b>Title and abstract</b> | 1              | (a) Indicate the study's design with a commonly used term in the title or the abstract                                          | Yes. We had indicated that this study is a cross-sectional study in title.                                                                                                                                                                      | Page 1             |
|                           |                | (b) Provide in the abstract an informative and balanced summary of what was done and what was found                             | Yes. These information was listed in "Abstract".                                                                                                                                                                                                | Page 2             |
| <b>Introduction</b>       |                |                                                                                                                                 |                                                                                                                                                                                                                                                 |                    |
| Background/rationale      | 2              | Explain the scientific background and rationale for the investigation being reported                                            | Yes. The research about the concordance of chronic conditions among the household members could cause people and health management department to pay attention to the effect of co-residence factor in the prevalence of some chronic diseases. | Page 3             |
| Objectives                | 3              | State specific objectives, including any prespecified hypotheses                                                                | Yes. We did effort to test and explore the hypothesis that whether one's chronic conditions are related to the others with chronic conditions living in the same household.                                                                     | Page 4             |
| <b>Methods</b>            |                |                                                                                                                                 |                                                                                                                                                                                                                                                 |                    |
| Study design              | 4              | Present key elements of study design early in the paper                                                                         | Yes. The data for this study was from the fifth Health Service Survey of Shanghai in 2013 (the extension of China's National Health Service Survey-NHSS), and this is a cross-sectional survey study.                                           | Page 5 -<br>Page 6 |
| Setting                   | 5              | Describe the setting, locations, and relevant dates, including periods of recruitment, exposure, follow-up, and data collection | Yes. This health survey was conducted in Shanghai, China, in 2013. Details could be found in "Data source" section.                                                                                                                             | Page 5             |
| Participants              | 6              | (a) Give the eligibility criteria, and the sources and methods of selection of participants                                     | Yes. In our study, we included the households with at least two adults who aged 18 or older.                                                                                                                                                    | Page 6             |
| Variables                 | 7              | Clearly define all outcomes, exposures,                                                                                         | Yes. We chose five chronic                                                                                                                                                                                                                      | Page 6             |

|                           |    |                                                                                                                                                                                      |                                                                                                                                                                                                                                                                                                                                                                              |                         |
|---------------------------|----|--------------------------------------------------------------------------------------------------------------------------------------------------------------------------------------|------------------------------------------------------------------------------------------------------------------------------------------------------------------------------------------------------------------------------------------------------------------------------------------------------------------------------------------------------------------------------|-------------------------|
|                           |    | predictors, potential confounders, and effect modifiers. Give diagnostic criteria, if applicable                                                                                     | conditions with high prevalence: hypertension, diabetes, Ischemic heart disease (IHD), cerebrovascular disease (CVD), obesity. Details could be found in “Five chronic conditions” section.                                                                                                                                                                                  |                         |
| Data sources/ measurement | 8* | For each variable of interest, give sources of data and details of methods of assessment (measurement). Describe comparability of assessment methods if there is more than one group | Yes. These five chronic conditions were from the self-reported records in the questionnaires, and we chose these diseases according to the disease coding list of the NHSS.                                                                                                                                                                                                  | Page5 - Page6           |
| Bias                      | 9  | Describe any efforts to address potential sources of bias                                                                                                                            | Yes. Some socio-demographic characteristics would be included in our analyses as covariates: Age, gender, education status, marriage status, health insurance status, smoking, drinking.                                                                                                                                                                                     | Page 7                  |
| Study size                | 10 | Explain how the study size was arrived at                                                                                                                                            | Yes. A total of 10,198 households (27,014 participants) with at least two adults who aged 18 or older were included in our study, and details could be found in figure 1.                                                                                                                                                                                                    | Page8 – Page9, Figure 1 |
| Quantitative variables    | 11 | Explain how quantitative variables were handled in the analyses. If applicable, describe which groupings were chosen and why                                                         | Yes. Then the generalized estimating equations (GEE) model with logit link would be used to find out the relationship between one’s chronic conditions and the others with chronic conditions living in the same household. And we would estimate these associations in three different household scenes: all household members, dyads of parents and children, and spouses. | Page 8                  |
| Statistical methods       | 12 | (a) Describe all statistical methods, including those used to control for                                                                                                            | Yes. Then the generalized estimating equations (GEE)                                                                                                                                                                                                                                                                                                                         | Page 8                  |

1  
2  
3  
4  
5  
6  
7  
8  
9  
10  
11  
12  
13  
14  
15  
16  
17  
18  
19  
20  
21  
22  
23  
24  
25  
26  
27  
28  
29  
30  
31  
32  
33  
34  
35  
36  
37  
38  
39  
40  
41  
42  
43  
44  
45  
46  
47  
48  
49  
50  
51  
52  
53  
54  
55  
56  
57  
58  
59  
60

confounding

model with logit link would be used in our study with adjusting for age, gender, health insurance status, education status, marriage status, drinking and smoking.

(b) Describe any methods used to examine subgroups and interactions

Yes. The subgroup analyses would be conducted in all household members scene according to two pre-defined stratification factors: sex (male or female), education (illiteracy/primary, secondary, and college).

Page 8

(c) Explain how missing data were addressed

Yes. We did not conducted any statistical model to deal with the missing data because of low missing data rate. The observation with missing data would be excluded from the final analyses.

Page 8

(d) If applicable, describe analytical methods taking account of sampling strategy

Yes. The GEE model would be applicable to household data.

Page 8

(e) Describe any sensitivity analyses

Yes. We also conducted crude GEE models to find out the relationship.

Page 8

## Results

Participants

13\*

(a) Report numbers of individuals at each stage of study—eg numbers potentially eligible, examined for eligibility, confirmed eligible, included in the study, completing follow-up, and analysed

Yes. The details could be found in the first paragraph of “Results” and figure 1.

Page 8 –  
Page 9,  
Figure 1

(b) Give reasons for non-participation at each stage

Yes. The details could be found in the first paragraph of “Results” and figure 1.

Page 8 –  
Page 9,  
Figure 1

(c) Consider use of a flow diagram

Yes. The figure 1 is a flow diagram.

Figure 1

Descriptive data

14\*

(a) Give characteristics of study participants (eg demographic, clinical, social) and information on exposures and potential confounders

Yes. The details could be found in the first paragraph of “Results” and table 1.

Page 9,  
Table 1

(b) Indicate number of participants with missing data for each variable of interest

Yes. The details could be found in the first paragraph of “Results” and figure 1.

Page 8 –  
Page 9,  
Figure 1

|                   |     |                                                                                                                                                                                                                                                                                                                                                                                                               |                                                                                                                                                                                                                                                                                                                            |                     |
|-------------------|-----|---------------------------------------------------------------------------------------------------------------------------------------------------------------------------------------------------------------------------------------------------------------------------------------------------------------------------------------------------------------------------------------------------------------|----------------------------------------------------------------------------------------------------------------------------------------------------------------------------------------------------------------------------------------------------------------------------------------------------------------------------|---------------------|
| Outcome data      | 15* | Report numbers of outcome events or summary measures                                                                                                                                                                                                                                                                                                                                                          | Yes. The details could be found in table 1.                                                                                                                                                                                                                                                                                | Table 1             |
| Main results      | 16  | (a) Give unadjusted estimates and, if applicable, confounder-adjusted estimates and their precision (eg, 95% confidence interval). Make clear which confounders were adjusted for and why they were included<br>(b) Report category boundaries when continuous variables were categorized<br>(c) If relevant, consider translating estimates of relative risk into absolute risk for a meaningful time period | Yes. The final conclusion was based on the results of the adjusted models. The results of adjusted model were listed in table 2-4, and those of crude model were available in the supplemental tables.                                                                                                                     | Table 2 – 4         |
| Other analyses    | 17  | Report other analyses done—eg analyses of subgroups and interactions, and sensitivity analyses                                                                                                                                                                                                                                                                                                                | Yes. The results of subgroup analyses were shown in figure 2 and supplemental table S2.                                                                                                                                                                                                                                    | Figure 2 & Table S2 |
| <b>Discussion</b> |     |                                                                                                                                                                                                                                                                                                                                                                                                               |                                                                                                                                                                                                                                                                                                                            |                     |
| Key results       | 18  | Summarise key results with reference to study objectives                                                                                                                                                                                                                                                                                                                                                      | Yes. We found that the participants who live with the household members with chronic conditions were associated with 46% higher OR of having one or more chronic condition. For these five chronic conditions, the above relationship was observed in each same chronic condition.                                         | Page 11             |
| Limitations       | 19  | Discuss limitations of the study, taking into account sources of potential bias or imprecision. Discuss both direction and magnitude of any potential bias                                                                                                                                                                                                                                                    | Yes. We discussed four points of limitation in the “Discussion” section.                                                                                                                                                                                                                                                   | Page 14             |
| Interpretation    | 20  | Give a cautious overall interpretation of results considering objectives, limitations, multiplicity of analyses, results from similar studies, and other relevant evidence                                                                                                                                                                                                                                    | Yes. The evidence about the effect of co-residence factor in some chronic conditions would suggest that people should pay more attention to their health status, especially those whose household members have chronic conditions. And the mechanisms about these associations should be investigated by further research. | Page 13 – Page 14   |



1  
2  
3  
4  
5  
6  
7  
8  
9

|                  |    |                                                                       |                                                                                                                                   |                      |
|------------------|----|-----------------------------------------------------------------------|-----------------------------------------------------------------------------------------------------------------------------------|----------------------|
| Generalisability | 21 | Discuss the generalisability (external validity) of the study results | Yes. The relationships of chronic conditions among the household members were consistent in three different scenes and subgroups. | Page 13 –<br>Page 14 |
|------------------|----|-----------------------------------------------------------------------|-----------------------------------------------------------------------------------------------------------------------------------|----------------------|

10

**Other information**11  
12  
13  
14  
15  
16  
17  
18  
19  
20  
21  
22  
23

|         |    |                                                                                                                                                               |                                                                                                                                                                                                                    |         |
|---------|----|---------------------------------------------------------------------------------------------------------------------------------------------------------------|--------------------------------------------------------------------------------------------------------------------------------------------------------------------------------------------------------------------|---------|
| Funding | 22 | Give the source of funding and the role of the funders for the present study and, if applicable, for the original study on which the present article is based | This study was conducted under a grant from the Fourth Round of Shanghai Three-year Action Plan on Public Health Discipline and Talent Program: Evidence-based Public Health and Health Economics(No. 15GWZK0901). | Page 16 |
|---------|----|---------------------------------------------------------------------------------------------------------------------------------------------------------------|--------------------------------------------------------------------------------------------------------------------------------------------------------------------------------------------------------------------|---------|

24  
25

\*Give information separately for exposed and unexposed groups.

26  
27  
28  
29  
30  
31  
32  
33

**Note:** An Explanation and Elaboration article discusses each checklist item and gives methodological background and published examples of transparent reporting. The STROBE checklist is best used in conjunction with this article (freely available on the Web sites of PLoS Medicine at <http://www.plosmedicine.org/>, Annals of Internal Medicine at <http://www.annals.org/>, and Epidemiology at <http://www.epidem.com/>). Information on the STROBE Initiative is available at [www.strobe-statement.org](http://www.strobe-statement.org).

34  
35  
36  
37  
38  
39  
40  
41  
42  
43  
44  
45  
46  
47  
48  
49  
50  
51  
52  
53  
54  
55  
56  
57  
58  
59  
60

# BMJ Open

## The concordance of chronic conditions among the household members in Shanghai: a cross-sectional study

|                                 |                                                                                                                                                                                                                                                                                                                                                                                                                                                                                                                                                                              |
|---------------------------------|------------------------------------------------------------------------------------------------------------------------------------------------------------------------------------------------------------------------------------------------------------------------------------------------------------------------------------------------------------------------------------------------------------------------------------------------------------------------------------------------------------------------------------------------------------------------------|
| Journal:                        | <i>BMJ Open</i>                                                                                                                                                                                                                                                                                                                                                                                                                                                                                                                                                              |
| Manuscript ID                   | bmjopen-2019-031240.R2                                                                                                                                                                                                                                                                                                                                                                                                                                                                                                                                                       |
| Article Type:                   | Original research                                                                                                                                                                                                                                                                                                                                                                                                                                                                                                                                                            |
| Date Submitted by the Author:   | 29-Nov-2019                                                                                                                                                                                                                                                                                                                                                                                                                                                                                                                                                                  |
| Complete List of Authors:       | Qin, Yingyi; Second Military Medical University, Department of Health Statistics<br>Guo, Yibin; Second Military Medical University, Department of Health Statistics<br>Tang, Yuanjun; Shanghai General Hospital, School of Medicine, Shanghai Jiaotong University, Department of Clinical Pharmacy<br>Wu, cheng; Second Military Medical University, Department of Health Statistics<br>Zhang, Xinji; Second Military Medical University, Department of Health Statistics<br>He, Qian; Second Mil Med Univ, Department of Health Statistics<br>He, Jia; Second Mil Med Univ, |
| <b>Primary Subject Heading</b>: | Epidemiology                                                                                                                                                                                                                                                                                                                                                                                                                                                                                                                                                                 |
| Secondary Subject Heading:      | Epidemiology, Public health                                                                                                                                                                                                                                                                                                                                                                                                                                                                                                                                                  |
| Keywords:                       | chronic conditions, household, concordance                                                                                                                                                                                                                                                                                                                                                                                                                                                                                                                                   |
|                                 |                                                                                                                                                                                                                                                                                                                                                                                                                                                                                                                                                                              |

SCHOLARONE™  
Manuscripts

# The concordance of chronic conditions among the household members in Shanghai: a cross-sectional study

Yingyi Qin<sup>1†</sup>, Yibin Guo<sup>1†</sup>, Yuanjun Tang<sup>2†</sup>, Cheng Wu<sup>1</sup>, Xinji Zhang<sup>1</sup>, Qian He<sup>1</sup>,

Jia He<sup>1,3\*</sup>

No. 800 Xiangyin Road, Shanghai, China, 200092

(1) Department of Health Statistics, Second Military Medical University, Shanghai, China

(2) Department of Clinical Pharmacy, Shanghai General Hospital, School of Medicine, Shanghai Jiaotong University

(3) Tongji University School of Medicine, Shanghai, China

†Equal contributors

\*Correspondence: Prof. Jia He, Department of Health Statistics, Second Military Medical University, Shanghai, China, (e-mail: hejia63@yeah.net ;Tel: +86211871441).

E-mail address:

Yingyi Qin: yingyi\_qin@163.com

Yibin Guo: guoyibin@smmu.edu.cn

Yuanjun Tang: wh.tyj.2007@163.com

Cheng Wu: wucheng\_wu@126.com

Xinji Zhang: xinjizhang@yeah.net

Qian He: heqian2008@hotmail.com

Jia He: hejia63@yeah.net

## Abstract

**Objectives:** Members living in the same household tend to share some similar behaviors and environment. We want to quantitatively assess the associations of chronic conditions to investigate the concordance of disease status among the household members.

**Setting:** Shanghai, China.

**Participants:** Our data was from the fifth Health Service Survey in Shanghai in 2013. 12,002 households with 31,531 residents were selected in this survey by using a three-stage, stratified, random sampling method.

**Outcome measures:** Five highly prevalent chronic conditions, namely hypertension, diabetes, ischemic heart disease (IHD), cerebrovascular disease (CVD), and obesity were chosen. The generalized estimating equations (GEE) model was used to estimate the associations adjusted for age, gender, education status, health insurance status, smoking, and drinking. Using a subsample of adult children with parents' chronic conditions as the key risk factor and a subsample of wives with the chronic conditions of the husband as key risk factor, we reran our GEE models to explore chronic condition concordance within these relationships.

**Results:** A total of 10,198 households with 27,010 adult participants were included. Using all adult household members, we found positive statistically significant associations between one's chronic conditions and the same disease status of their household members (hypertension [odds ratio (OR) = 3.26, 95% confidence interval (CI): 3.02-3.52]; diabetes [OR = 1.68, 95% CI: 1.40-2.01]; IHD [OR = 5.31, 95% CI: 3.56-7.92]; CVD [OR = 3.40, 95% CI: 1.99-5.80]; and obesity [OR = 3.41, 95% CI: 2.34-4.96]). The results of analyzing ad-child subsample and spouse subsample also showed similar associations. Moreover, the potential concordance of different chronic conditions was found between hypertension and diabetes.

1  
2  
3  
4 **Conclusions:** We found chronic condition concordance within households. This study  
5  
6 provides evidence that the chronic conditions of other members of a household may be  
7  
8 a significant risk factor for a household member's own health.  
9

10 **Strength & Limitations:**

- 11  
12  
13 ● This is the first study in China to estimate the risk to a household member's own  
14 health, which associate with the chronic conditions of other household members.  
15  
16  
17 ● We perform multivariate logistic GEE models to estimate the association between  
18 an adult's own chronic condition status and the chronic condition status of other  
19 household members within three subsamples including all adult household  
20 members, children with parents' chronic conditions as key risk factor, and wives  
21 with husband's chronic conditions as key risk factor.  
22  
23  
24 ● The definition and diagnosis of chronic condition for each participant was based  
25 on his or her self-reported records.  
26  
27  
28 ● This study was conducted in Shanghai and the results might not be generalized to  
29 other regions of China.  
30  
31  
32 ● Based as it is on cross-sectional data, this study does not estimate the risk of a new  
33 chronic condition in a household member, nor does it provide evidence of a causal  
34 relationship.  
35  
36  
37  
38  
39  
40  
41  
42  
43  
44  
45  
46  
47  
48  
49  
50  
51  
52  
53  
54  
55  
56  
57  
58  
59  
60

**Key words:** chronic conditions; household; concordance

## Background

During the past three decades, China had experienced rapid social, economic and health services development<sup>1 2</sup>. Life expectancy has increased, lifestyles have changed, health care has become more accessible, and health insurance coverage has increased. Aligned with these remarkable improvements, healthcare concerns in the country have expanded from a narrow focus on infectious diseases to encompass treatment for non-communicable chronic conditions as well<sup>2-4</sup>. Research has shown the prevalence of hypertension increased from 5.11% in 1959 to 17.65% in 2002, and the prevalence of type 2 diabetes mellitus increased from 1% in 1980 to 9.7% in 2008<sup>5-7</sup>. In measuring disability-adjusted life-years (DALYs), non-communicable chronic conditions have become main contributors to a country's burden of disease. As of 2015, high systolic blood pressure, high fasting plasma glucose, and high body mass index respectively ranked 1<sup>st</sup>, 2<sup>nd</sup>, and 4<sup>th</sup> as important risk factors related to DALY. In 1990, the respective ranks of these three diseases were only 3<sup>rd</sup>, 10<sup>th</sup> and 13<sup>th</sup>.<sup>8</sup> As a typical city in China, Shanghai represents the direction of economic and healthy development in China. Noteworthy, aging is a significant issue in Shanghai. Moreover, this would bring about the new healthcare challenges for Chinese society and government<sup>9</sup>.

Improvement in health care and innovation of new effective medical treatments will definitely play an increasingly important role in dealing with chronic conditions. Additionally, detection of risk factors and identification of individuals at high-risk are the important first steps in the prevention and treatment of chronic conditions. To study the risk factors, various research has mainly focused on the personal lifestyles related to the risk of chronic conditions, for example smoking, drinking, exercise, and diet<sup>10-13</sup>. Some genetic mechanisms are also considered as the risk factors of chronic conditions<sup>14</sup><sup>15</sup>. The household environment, which integrate the lifestyles, genetic mechanisms and environmental factors, would be an important research direction in controlling the

1  
2  
3  
4 prevalence of chronic conditions<sup>16</sup>.  
5

6 Based on the fifth Health Service Survey of Shanghai, which was the extension of  
7  
8 China's National Health Service Survey (NHSS) in 2013, the prevalence rate was 27.24%  
9  
10 for hypertension and 7.05% for diabetes among 29,269 people aged 15 or older<sup>17</sup>.  
11  
12 Regarding hypertension, 6,096 out of 12,002 households (50.79%) had at least one  
13  
14 member with hypertension, and 1,733 households (28.43%) of these 6,096 households  
15  
16 had at least two members suffering from the disease. This result showed the possibility  
17  
18 of household clustering in the prevalence of chronic conditions. We hypothesized that  
19  
20 there were associations between chronic conditions in the participants and the same  
21  
22 conditions in their household members, we conducted the research and analyses using  
23  
24 data from the fifth Health Service Survey of Shanghai. In this study, we focused on five  
25  
26 highly prevalent chronic conditions: hypertension, diabetes, Ischemic heart disease  
27  
28 (IHD), cerebrovascular disease (CVD), and obesity. Risk factors based on chronic  
29  
30 conditions in other family members were detected for subsamples consisting of all  
31  
32 household members, adult children, and wives, respectively.  
33  
34  
35  
36  
37

## 38 **Methods**

### 39 **Data source**

40  
41 In this study, we used data from the fifth Health Service Survey of Shanghai in 2013.  
42  
43 This survey was organized and conducted by the Shanghai Municipal Commission  
44  
45 Health and Family Planning, and was the extension of NHSS. From 1993 to 2013, the  
46  
47 NHSS has been conducted for five times (every five years), and is a cross-sectional  
48  
49 survey study<sup>18</sup>. The sampling method and quality assurance measures used in Shanghai  
50  
51 survey were consistent with the national sampling approach and principle<sup>19</sup>. The fifth  
52  
53 Health Service Survey of Shanghai was conducted in all of the 17 districts in Shanghai.  
54  
55 The survey adopted a three-stage, stratified, random sampling method. In the first stage,  
56  
57  
58  
59  
60

1  
2  
3  
4 100 towns/townships were randomly selected from all these 17 districts. In the second  
5  
6 stage, one thousand villages/communities were randomly sampled from the selected  
7  
8 towns/townships. In the third stage, about 12,000 households were randomly selected.  
9  
10 We conducted a face-to-face interview with each household using a structured  
11  
12 household questionnaire developed by the National Commission Health and Family  
13  
14 Planning of China. The questionnaire contained the general information of the  
15  
16 households, the demographic characteristics of household members, relationships  
17  
18 among them, their self-reported illnesses and injuries, as well as their outpatient and  
19  
20 inpatient information.  
21  
22

23 To ensure the quality of this survey, certain assurance measures were applied during  
24  
25 the process of data collection. Survey constitutors checked potential logic errors of the  
26  
27 collected data. In case of any logic errors, the investigators would contact the household  
28  
29 members and verify the relevant information. The accuracy of data information was  
30  
31 assessed using the revisit approach. More specifically, the investigators revisited 5% of  
32  
33 the sampled households and collected ten key questions to check the consistency of the  
34  
35 information recorded. The consistency rate between these two visits was nearly 99 %.  
36  
37 Additionally, the Myer's Blended index was 7.39, indicating that there was non-  
38  
39 existence of age preference in this survey<sup>17 20</sup>. Finally, this survey collected the  
40  
41 information of 12,002 households with 31,531 participants. We included the  
42  
43 households with at least two adults aged 18 years or older.  
44  
45  
46  
47  
48  
49

### 50 **Five chronic conditions**

51 In this survey, we chose five chronic conditions with high prevalence rates:  
52  
53 hypertension, diabetes, IHD, CVD, and obesity. The definition of these chronic  
54  
55 conditions were based on the corresponding questions in the questionnaire, the disease  
56  
57 coding list of the NHSS, and Body mass index (BMI). If a participant chose "YES" or  
58  
59  
60



1  
2  
3  
4 a specific disease code, he or she was considered to have the corresponding chronic  
5  
6 condition.

7  
8 **Hypertension:** Hypertension was indicated based on the question “Have you ever been  
9  
10 told by a doctor that you have hypertension?” in the questionnaire.

11  
12 **Diabetes:** Diabetes was indicated based on the question “Have you ever been told by a  
13  
14 doctor that you have diabetes?” in the questionnaire.

15  
16 **IHD:** The disease codes for IHD included angina pectoris (061), myocardial infarction  
17  
18 (062), and other ischemic heart disease (063).

19  
20 **CVD:** The disease code for CVD included cerebrovascular disease (067).

21  
22 **Obesity:** Obesity was indicated by the World Health Organization (WHO)  
23  
24 International BMI categories ( $\text{BMI} \geq 30 \text{ kg/m}^2$ )<sup>21</sup>.

### 25 26 27 28 29 30 **Covariates**

31  
32 Socio-demographic characteristics added to our models as covariates include age  
33  
34 (continuously specified in years), education status (illiteracy/primary, secondary or  
35  
36 college), health insurance status (yes or no), marriage status (married, unmarried,  
37  
38 divorced or widowed), smoking (yes or no), and drinking (yes or no). Except the  
39  
40 analyses of spouse subsample, gender (male or female) was also included as a covariate.

### 41 42 43 44 45 **Statistical analyses**

46  
47 This study had five primary outcomes, each of which represented the status of each of  
48  
49 the five chronic conditions, namely hypertension, diabetes, IHD, CVD, and obesity, in  
50  
51 the participants (“No” or “Yes”). If a participant had any of these five chronic  
52  
53 conditions (“Yes”), his or her status of having “Any chronic condition” is considered  
54  
55 as “Yes”. To make a comprehensive assessment, we settled three subsamples: all adult  
56  
57 household members (the total sample), adult children (adult children subsample), and  
58  
59  
60

1  
2  
3  
4 wives (spouse subsample). In addition, we identified chronic conditions in the other  
5  
6 household members as the exposure (or risk factor) in three subsamples.

7  
8 For the full study sample of all adult household members, we included all household  
9  
10 members aged 18 years or older. If any other residents (excluding self) have the given  
11  
12 chronic conditions, the exposure status of household situation for each participant is  
13  
14 identified as “Yes”. For the subsample of adult children, only adult children would be  
15  
16 included in analyses, and those participants were excluded if the disease information of  
17  
18 parents were not available. The chronic conditions status of their parents were  
19  
20 considered as exposure. For the subsample of spouses, we included married women in  
21  
22 the analyses. We defined the chronic conditions of wives as the outcomes and the  
23  
24 chronic conditions of husbands as the exposure.  
25  
26

27  
28 The generalized estimating equations (GEE) model with logit link would be used to  
29  
30 explore the associations between chronic conditions of participants and the conditions  
31  
32 of the others living in the same household. We considered a two-level hierarchical  
33  
34 structure of the model (individuals within households). The model was based on  
35  
36 individual’s data without taking sampling weight into account due to the lack of  
37  
38 relevant information. The odds ratio (OR) and 95% confidence interval (CI) were  
39  
40 estimated by the GEE model to indicate the association between any chronic condition  
41  
42 or each given chronic condition of an individual and the same condition of household  
43  
44 member (e.g., the association between the hypertensive status of a participants and that  
45  
46 same condition in his or her other household members). In addition, the association of  
47  
48 different chronic conditions would also be assessed (e.g., the association between  
49  
50 hypertension in a participant and diabetes in other household members).  
51  
52

53  
54 Adjusted models and unadjusted models were both used to estimate the associations in  
55  
56 three household subsamples. The adjusted models included age, gender, health  
57  
58 insurance status, education status, drinking and smoking; however, gender was  
59  
60

1  
2  
3  
4 excluded in the subsample of spouses. The final conclusion was based on the results of  
5  
6 the adjusted models. The results of unadjusted models are given to provide  
7  
8 supplemental information. We chose the exchangeable working correlation matrix to  
9  
10 estimate standard errors of coefficients in the GEE models.  
11

12 The subgroup analyses were conducted for the full study sample of all adult household  
13  
14 members according to two pre-defined stratification factors: sex (male or female),  
15  
16 education (illiteracy/primary, secondary, and college). We did not conducted any  
17  
18 statistical model to deal with the missing data because of low missing data rates. Any  
19  
20 observation with missing data would be excluded from the final analyses. All data  
21  
22 management and statistical analyses were performed using SAS software (version 9.4;  
23  
24 SAS Institute Inc., Cary, NC). All reported p values were two-sided and p value < 0.05  
25  
26 was regarded as statistically significant. This study was reported based on the  
27  
28 Strengthening the Reporting of Observational studies in Epidemiology (STROBE)  
29  
30 guidelines (supplementary S1), and all analyses were conducted according to the  
31  
32 statistical analysis plan (supplementary S2).  
33  
34  
35  
36  
37  
38

### 39 **Patient and public involvement**

40 This is a cross-sectional study based on survey responses. It includes no further patient  
41  
42 involvement.  
43  
44  
45  
46

### 47 **Results**

48 A total of 10,198 households (27,010 participants) with at least two adults who aged 18  
49  
50 years or older were included in our study from the database of the fifth Health Service  
51  
52 Survey of Shanghai in 2013. For the subsample of adult children, there were 5,489  
53  
54 available records, and for the subsample of spouses, there were 7,844 records. The  
55  
56 detail information was shown in flowchart (Fig. 1). Table 1 has shown the details of  
57  
58  
59  
60

socio-demographic characteristics. The mean age of all included participants was 52.63 years, and 31.34% (n=8,467) had at least one chronic condition. However, the adult children participants in the subsample of adult children were young (36.01 years), and the prevalence rates of chronic conditions were much low (11.89%).

### **All household members**

In the full study sample of all adult household members, the results indicated that the chronic conditions of participants was associated with the same conditions of others living in the same household (the diagonal of Table 2): any chronic condition (OR =3.03, 95% CI: 2.81-3.28), hypertension (OR =3.26, 95% CI: 3.02-3.52), diabetes (OR = 1.68, 95% CI: 1.40-2.01), IHD (OR = 5.31, 95% CI: 3.56-7.92), CVD (OR = 3.40, 95% CI: 1.99-5.80), and obesity (OR = 3.41, 95% CI: 2.34-4.96). The results also revealed that there were significantly positive associations for some different chronic conditions (diabetes and hypertension, diabetes and obesity). The OR was 1.19 (95% CI: 1.08-1.32) for diabetes to hypertension and 1.23 (95% CI: 1.11-1.36) for hypertension to diabetes. The OR was 1.36 (95% CI:1.08-1.73) for diabetes to obesity and 1.36 (95% CI: 1.09-1.70) for obesity to diabetes. More details were presented in Table 2, and the results of unadjusted GEE models were listed in the Table S1.

In subgroup analysis, we found the similar associations for the sex subgroups and education level subgroups (Fig. 2, Fig. 3 and Table S2). However, no significant association was not found in the analyses of diabetes and IHD in the college education subgroup.

### **Adult children subsample**

We did not conduct the analyses of IHD and CVD in this household subsample because of low prevalence rates (0.2% for IHD, and 0.15% for CVD). Table 3 listed the results of adjusted GEE models for adult children. The positive associations between chronic conditions of adult children and the same conditions of their parents were observed:

1  
2  
3  
4 any chronic condition (OR = 5.13, 95% CI: 4.20-6.28), hypertension (OR = 6.29, 95%  
5 CI: 4.92-8.05), diabetes (OR = 11.56, 95% CI: 7.88-16.98), and obesity (OR = 13.85,  
6 95% CI: 8.54-22.46). For different chronic conditions, the children with diabetes and  
7 obesity were associated with parents with hypertension (OR was 2.40 for diabetes, and  
8 OR was 1.69 for obesity). And the results also indicated that hypertension status of  
9 children was associated with the diabetes status of their parents (OR = 1.61). The results  
10 of unadjusted GEE models for the subsample of adult children were listed in the Table  
11 S3.  
12  
13  
14  
15  
16  
17  
18  
19  
20  
21

### 22 **Spouses subsample**

23 The results of the spouses subsample are shown in the Table 4. Similar to the other two  
24 subsamples above, positive statistically significant associations were also observed  
25 between chronic conditions in husbands and the same conditions in their spouses: any  
26 chronic condition (OR = 1.58, 95% CI: 1.41-1.77), hypertension (OR = 1.63, 95% CI:  
27 1.45-1.84), diabetes (OR = 1.57, 95% CI: 1.21-2.03), IHD (OR = 6.58, 95% CI: 3.78-  
28 11.43), CVD (OR = 3.62, 95% CI: 1.86-7.07), and obesity (OR = 5.09, 95% CI: 2.92-  
29 8.86). The wives with diabetes and IHD were associated with the hypertension status  
30 of their husbands (OR was 1.46 for diabetes, and OR was 1.60 for IHD). And the  
31 association between the hypertension status of wives and the diabetes status of  
32 husbands was also indicated (OR = 1.29). The information of unadjusted GEE models  
33 could be available in Table S4.  
34  
35  
36  
37  
38  
39  
40  
41  
42  
43  
44  
45  
46  
47  
48  
49

### 50 **Discussion**

51 In China, Shanghai has the heaviest burden of noncommunicable diseases because of  
52 its largest population and ageing population<sup>22</sup>. We conducted in-depth analyses of the  
53 associations among five pre-selected chronic conditions status within the household  
54 members in Shanghai, China. Using the data of the fifth Health Service Survey, we  
55  
56  
57  
58  
59  
60

1  
2  
3  
4 found that the participants living with their household members with chronic conditions  
5  
6 were associated with 46% higher OR of having one or more chronic conditions. For  
7  
8 each of five chronic conditions, the above associations were observed in each same  
9  
10 chronic condition. We also found the similar associations in children subsample and  
11  
12 spouses subsample. These results were consistent with some other research results<sup>16 23-</sup>  
13  
14 <sup>25</sup>. Additionally, the results suggested potential associations between the different  
15  
16 chronic conditions, for example hypertension and diabetes.  
17

18  
19 We chose five chronic conditions (hypertension, diabetes, IHD, CVD, and obesity) as  
20  
21 the target diseases of our study because of the highest prevalence rates in this health  
22  
23 service survey. Based on the current knowledge, the incidence of the chronic conditions  
24  
25 is the result of the combination of multiple factors. The members of the same household  
26  
27 would live in the same environment, and might have the similar behaviors. In addition,  
28  
29 some of them would have genetic associations (e.g. parents and children, or brothers  
30  
31 and sisters). Some research reported the association between the family health history  
32  
33 and risk of disease<sup>26-28</sup>. However, if a member of the household was diagnosed with a  
34  
35 certain type of chronic condition, the likelihood of the other family members having  
36  
37 their diagnostic tests performed was higher. This phenomenon might cause reporting  
38  
39 bias and lead to the association of chronic conditions among household members. Our  
40  
41 study pointed out the positive associations between chronic conditions in adults and the  
42  
43 same conditions in their household members. According to the results of all household  
44  
45 members, we found that the ORs for IHD and CVD were high, and the 95% CI of the  
46  
47 corresponding ORs was wide. An explanation might be that the prevalence rates of IHD  
48  
49 and CVD were only 1.68% and 1.38%, respectively. Moreover, low prevalence rates  
50  
51 might reduce the accuracy of the statistical model estimation. However, the results of  
52  
53 both the adjusted GEE model and the unadjusted one showed the positive associations  
54  
55 for these two chronic conditions.  
56  
57  
58  
59  
60

1  
2  
3  
4 In order to further explore the effect of a common genetic factor or a common living  
5 environment, we analyzed two subsamples, a subsample of adult children to exam the  
6 two factors together, and a subsample of spouses to exam living environment factors in  
7 the absence of a common genetic link. Similar to results using all adult household  
8 members, positive associations were found in these two subsamples. These findings  
9 were consistent with some previous studies<sup>23-25 29 30</sup>. The results of analyses in these  
10 two special subsamples showed the effects of genetic factors and those of a common  
11 living environment without genetic ties on the associations of interest. Moreover, the  
12 adjusted ORs in analyses about children subsample were much higher (e.g. OR = 6.12  
13 for hypertension association). However, we could make a conclusion that the effect of  
14 genetic factors was much more important. This might be because certain chronic  
15 conditions are age-related diseases, and the prevalence rates of adult children in this  
16 health service survey were low. For example, the prevalence of hypertension among  
17 adult children was only 8.86% (the mean of age was 39.16 years old), and prevalence  
18 rate for those whose parents had no hypertension was much lower (only 3.34%, the  
19 mean of age was 34.36 years old). Based on this consideration, we included the age  
20 covariate into the adjusted model. Therefore, these results might reflect the associations  
21 between chronic conditions in children and those in their parents despite high ORs. In  
22 order to show the effects of covariates more clearly, we listed the results of full models  
23 for three subsamples in the Table S5. We found that the effects of most covariates were  
24 consistent across three subsamples.

25  
26  
27  
28  
29  
30  
31  
32  
33  
34  
35  
36  
37  
38  
39  
40  
41  
42  
43  
44  
45  
46  
47  
48  
49 In addition to explore the association of the same chronic condition between  
50 participants and their household members, the results of different chronic conditions  
51 indicated that there was positive association between hypertension and diabetes. This  
52 association was seen in all three subsamples. The mechanisms and pathways could not  
53 be concluded in our study, but certain previous studies might provide some hypotheses.

1  
2  
3  
4 The hypertension and diabetes are the syndromes of metabolic syndrome (MetS). Some  
5  
6 risk factors for MetS, such as lifestyle, diet, family disease history, environment, might  
7  
8 be the co-factors for the prevalence of hypertension and diabetes<sup>31-33</sup>. However, the  
9  
10 exact mechanisms should need further investigation.

11  
12 Although the aim of our study is not to investigate certain specific risk factors for the  
13  
14 prevalence of chronic conditions, the quantitative assessment showed the concordance  
15  
16 of chronic conditions within households. We suggested that individuals whose  
17  
18 household members had certain chronic conditions should pay more attention to their  
19  
20 health status. Health education about chronic diseases and breaking some potential  
21  
22 unhealthy behaviors might help reduce the prevalence rates of chronic conditions  
23  
24 among those individuals. Moreover, regular health examination (e.g. measurement of  
25  
26 blood pressure and weight) would be helpful for residents to monitor their own health  
27  
28 status. Shanghai is the biggest and most developed city in China, and lends the  
29  
30 development trend. Some researchers indicated that Shanghai Chronic Disease Self-  
31  
32 Management Program (CDSMP), the most widely accepted self-management patient  
33  
34 education programmer worldwide, could improved participants' health behavior, self-  
35  
36 efficacy, and health status<sup>22</sup>. Maybe this program could be modified and acceptable to  
37  
38 the healthy residents whose household members have chronic conditions. Moreover,  
39  
40 the chronic condition concordance within households should also be given special care  
41  
42 in other regions of China, and the relevant solutions should be worked out advanced.  
43  
44 These would be beneficial for controlling the prevalence rate of chronic conditions and  
45  
46 reducing the disease burden for the country and among residents.

47  
48 Our study had several potential limitations. First, the definition and diagnosis of chronic  
49  
50 condition for each participant was based on his or her self-reported records. This might  
51  
52 lead to the potential risk of underreporting and misreporting. However, this survey was  
53  
54 part of the NHSS and every investigator had undergone rigorous and formal training.  
55  
56  
57  
58  
59  
60



1  
2  
3  
4 Previous research has shown the agreement between biomedical and self-reported  
5 measurements of certain chronic conditions in a Chinese national community sample<sup>34</sup>.  
6  
7  
8 Therefore, the records of these five chronic conditions would be reliable. Second, this  
9 study was conducted in Shanghai and the results could not represent the situation in  
10 other regions of China. Nevertheless, it could draw the attention of the public and health  
11 management departments to this problem. Third, our study could neither estimate the  
12 risk of new chronic conditions among household members nor find out a certain  
13 significant risk factor. We only pointed out the phenomenon that there were  
14 associations for the prevalence of chronic conditions at the household level. The  
15 mechanism and specific causes of cohabitation effects on prevalence of chronic  
16 conditions could not be presented by our study. These results suggested that we'd better  
17 pay attention to the health status of the health residents in the households with members  
18 with chronic conditions. Fourth, this study is a cross-sectional survey study, and several  
19 potential bias, such as recall bias, confounding bias and reporting bias, might not be  
20 completely avoided. The exclusion of households with only one family member might  
21 also cause some selection bias. To deal with the confounding bias, we conducted the  
22 analyses using the adjusted GEE models with some socio-demographic covariates.  
23  
24  
25  
26  
27  
28  
29  
30  
31  
32  
33  
34  
35  
36  
37  
38  
39  
40  
41  
42  
43  
44

## 45 **Conclusions**

46  
47 In conclusion, our study indicated that one's chronic condition status was associated  
48 with the status of their household members in the Shanghai, China. The results of adult  
49 children and spouses subsamples were consistent with those of all household members.  
50  
51 Additionally, analyses about different chronic conditions suggested possible positive  
52 associations between hypertension and diabetes. The mechanisms about these  
53 associations should be investigated by further research. However, the evidence about  
54  
55  
56  
57  
58  
59  
60

1  
2  
3  
4 the association of chronic conditions for the same household members suggests that  
5  
6 people should pay more attention to their health status, especially those whose  
7  
8 household members have chronic conditions. That might reduce the prevalence and  
9  
10 increase the early detection rate about some chronic conditions.  
11  
12  
13

## 14 **List of abbreviations**

15  
16  
17 IHD = ischemic heart disease

18  
19 CVD = cerebrovascular disease

20  
21 GEE = generalized estimating equations

22  
23 OR = odds ratio

24  
25 CI = confidence interval

26  
27 DALYs = disability-adjusted life-years

28  
29 NHSS = National Health Service Survey

30  
31 BMI = body mass index

32  
33 WHO = World Health Organization

34  
35 STROBE = Strengthening the Reporting of Observational studies in Epidemiology

36  
37 MetS = metabolic syndrome

38  
39 CDSMP = Chronic Disease Self-Management Program  
40  
41  
42  
43  
44

## 45 **Declarations**

### 46 **Ethics approval and consent to participate**

47  
48 This cross-sectional questionnaire survey was organized by the Shanghai Municipal  
49  
50 Commission Health and Family Planning. As we knew, this survey didn't contain any  
51  
52 treatment, blood drawing or others intervention which might influence the health of  
53  
54 participators. Informed consent was obtained by surveyors prior to data collection and  
55  
56 personal information was with strict conservation during our analysis process. Thus no  
57  
58  
59  
60

1  
2  
3  
4 ethical approval is required for our study.  
5

## 6 **Data sharing**

7  
8 No.  
9

## 10 **Data availability statement**

11  
12 Data are available upon reasonable request.  
13

## 14 **Competing of interest**

15  
16  
17 The authors declare that they have no competing interests.  
18

## 19 **Funding**

20  
21 This study was conducted under a grant from the Fourth Round of Shanghai Three-year  
22  
23 Action Plan on Public Health Discipline and Talent Program: Evidence-based Public  
24  
25 Health and Health Economics(No. 15GWZK0901), Shanghai Sailing Program (No.  
26  
27 18YF1429500), National Thirteenth Five Year Plan Major Special Project  
28  
29 (2017ZX09304016), and National Science and Technology Major Project (Grant No.  
30  
31 2017ZX09304030).  
32  
33

## 34 **Authors' contribution**

35  
36 Dr. Yingyi Qin, Dr. Yibin Guo and Prof. Jia He designed this study. Dr. Yingyi Qin,  
37  
38 Dr. Yibin Guo and Prof. Cheng Wu analyzed the data. Prof. Qian He and Dr. Xinji  
39  
40 Zhang checked the statistical analysis. Dr. Yibin Guo and Dr. Yingyi Qin wrote the  
41  
42 manuscript. Mrs. Yuanjun Tang, Dr. Yingyi Qin, Dr. Yibin Guo and Prof. Jia He  
43  
44 revised this manuscript.  
45  
46

## 47 **Acknowledge**

48  
49 We appreciate the Shanghai Municipal Commission Health and Family Planning for  
50  
51 their assistance in designing this study. We also thank the participates and data  
52  
53 managers who gave their time and effort to participate in the fifth Health Service Survey  
54  
55 of Shanghai.  
56  
57

## 58 **References**

- 1  
2  
3  
4  
5  
6 1. Meng Q, Xu L, Zhang Y, et al. Trends in access to health services and financial protection in  
7  
8  
9 China between 2003 and 2011: a cross-sectional study. *Lancet* 2012;379(9818):805-  
10  
11 14. doi: 10.1016/S0140-6736(12)60278-5  
12  
13
- 14 2. Zhou M, Wang H, Zhu J, et al. Cause-specific mortality for 240 causes in China during 1990-  
15  
16 2013: a systematic subnational analysis for the Global Burden of Disease Study 2013.  
17  
18 *Lancet* 2016;387(10015):251-72. doi: 10.1016/S0140-6736(15)00551-6  
19  
20  
21
- 22 3. Milner J, Wilkinson P. Trends in cause-specific mortality in Chinese provinces. *Lancet*  
23  
24 2016;387(10015):204-5. doi: 10.1016/S0140-6736(15)00553-X  
25  
26
- 27 4. Access GBDH, Quality Collaborators. Electronic address cue, Access GBDH, et al.  
28  
29 Healthcare Access and Quality Index based on mortality from causes amenable to  
30  
31 personal health care in 195 countries and territories, 1990-2015: a novel analysis from  
32  
33 the Global Burden of Disease Study 2015. *Lancet* 2017;390(10091):231-66. doi:  
34  
35 10.1016/S0140-6736(17)30818-8  
36  
37  
38
- 39 5. Ruan Y, Mo M, Joss-Moore L, et al. Increased waist circumference and prevalence of type  
40  
41 2 diabetes and hypertension in Chinese adults: two population-based cross-sectional  
42  
43 surveys in Shanghai, China. *BMJ open* 2013;3(10):e003408. doi: 10.1136/bmjopen-  
44  
45 2013-003408  
46  
47  
48
- 49 6. Wu Y, Huxley R, Li L, et al. Prevalence, awareness, treatment, and control of hypertension  
50  
51 in China: data from the China National Nutrition and Health Survey 2002. *Circulation*  
52  
53 2008;118(25):2679-86. doi: 10.1161/CIRCULATIONAHA.108.788166  
54  
55  
56
- 57 7. Yang W, Lu J, Weng J, et al. Prevalence of diabetes among men and women in China. *The*  
58  
59  
60

- 1  
2  
3  
4 *New England journal of medicine* 2010;362(12):1090-101. doi:  
5  
6 10.1056/NEJMoa0908292  
7  
8  
9 8. Cohen AJ, Brauer M, Burnett R, et al. Estimates and 25-year trends of the global burden of  
10  
11 disease attributable to ambient air pollution: an analysis of data from the Global Burden  
12  
13 of Diseases Study 2015. *Lancet* 2017;389(10082):1907-18. doi: 10.1016/S0140-  
14  
15 6736(17)30505-6  
16  
17  
18  
19 9. Fang EF, Scheibye-Knudsen M, Jahn HJ, et al. A research agenda for aging in China in the  
20  
21 21st century. *Ageing research reviews* 2015;24(Pt B):197-205. doi:  
22  
23 10.1016/j.arr.2015.08.003  
24  
25  
26  
27 10. Orozco LJ, Buchleitner AM, Gimenez-Perez G, et al. Exercise or exercise and diet for  
28  
29 preventing type 2 diabetes mellitus. *The Cochrane database of systematic reviews*  
30  
31 2008(3):CD003054. doi: 10.1002/14651858.CD003054.pub3  
32  
33  
34  
35 11. Yu R, Yan LL, Wang H, et al. Effectiveness of a community-based individualized lifestyle  
36  
37 intervention among older adults with diabetes and hypertension, Tianjin, China, 2008-  
38  
39 2009. *Preventing chronic disease* 2014;11:E84. doi: 10.5888/pcd11.120333  
40  
41  
42  
43 12. Pan A, Wang Y, Talaei M, et al. Relation of active, passive, and quitting smoking with  
44  
45 incident type 2 diabetes: a systematic review and meta-analysis. *The lancet Diabetes*  
46  
47 *& endocrinology* 2015;3(12):958-67. doi: 10.1016/S2213-8587(15)00316-2  
48  
49  
50  
51 13. Knott C, Bell S, Britton A. Alcohol Consumption and the Risk of Type 2 Diabetes: A  
52  
53 Systematic Review and Dose-Response Meta-analysis of More Than 1.9 Million  
54  
55 Individuals From 38 Observational Studies. *Diabetes care* 2015;38(9):1804-12. doi:  
56  
57 10.2337/dc15-0710  
58  
59  
60

- 1  
2  
3  
4 14. Replication DIG, Meta-analysis C, Asian Genetic Epidemiology Network Type 2 Diabetes  
5  
6 C, et al. Genome-wide trans-ancestry meta-analysis provides insight into the genetic  
7  
8 architecture of type 2 diabetes susceptibility. *Nature genetics* 2014;46(3):234-44. doi:  
9  
10 10.1038/ng.2897  
11  
12  
13  
14 15. Zhang C, Wang L, Liao Q, et al. Genetic associations with hypertension: meta-analyses of  
15  
16 six candidate genetic variants. *Genetic testing and molecular biomarkers*  
17  
18 2013;17(10):736-42. doi: 10.1089/gtmb.2013.0080  
19  
20  
21  
22 16. Patel SA, Dhillon PK, Kondal D, et al. Chronic disease concordance within Indian  
23  
24 households: A cross-sectional study. *PLoS medicine* 2017;14(9):e1002395. doi:  
25  
26 10.1371/journal.pmed.1002395  
27  
28  
29  
30 17. Zhang X, Zhang Y, Xiao X, et al. The relation between health insurance and management  
31  
32 of hypertension in Shanghai, China: a cross-sectional study. *BMC public health*  
33  
34 2016;16:959. doi: 10.1186/s12889-016-3627-3  
35  
36  
37  
38 18. Yuefeng L, Keqin R, Xiaowei R. Use of and factors associated with self-treatment in China.  
39  
40 *BMC public health* 2012;12:995. doi: 10.1186/1471-2458-12-995  
41  
42  
43 19. Xu Y, Gao J, Zhou Z, et al. Measurement and explanation of socioeconomic inequality in  
44  
45 catastrophic health care expenditure: evidence from the rural areas of Shaanxi  
46  
47 Province. *BMC health services research* 2015;15:256. doi: 10.1186/s12913-015-0892-  
48  
49 2  
50  
51  
52  
53 20. Bello Y. Error Detection in Outpatients' Age Data Using Demographic Techniques. *Int J*  
54  
55 *Pure Appl Sci Technol* 2012;10:27-36  
56  
57  
58  
59 21. Obesity: preventing and managing the global epidemic. Report of a WHO consultation.  
60

- 1  
2  
3  
4 *World Health Organization technical report series* 2000;894:i-xii, 1-253.  
5  
6  
7 22. Fu D, Fu H, McGowan P, et al. Implementation and quantitative evaluation of chronic  
8  
9 disease self-management programme in Shanghai, China: randomized controlled trial.  
10  
11 *Bulletin of the World Health Organization* 2003;81(3):174-82.  
12  
13  
14 23. Lee MH, Kim HC, Thomas GN, et al. Familial concordance of metabolic syndrome in Korean  
15  
16 population--Korean National Health and Nutrition Examination Survey 2005. *Diabetes*  
17  
18 *research and clinical practice* 2011;93(3):430-6. doi: 10.1016/j.diabres.2011.06.002  
19  
20  
21  
22 24. Okuda T, Miyazaki T, Sakuragi S, et al. Significant but weak spousal concordance of  
23  
24 metabolic syndrome components in Japanese couples. *Environmental health and*  
25  
26 *preventive medicine* 2014;19(2):108-16. doi: 10.1007/s12199-013-0361-7  
27  
28  
29  
30 25. Sun J, Lu J, Wang W, et al. Prevalence of Diabetes and Cardiometabolic Disorders in  
31  
32 Spouses of Diabetic Individuals. *American journal of epidemiology* 2016;184(5):400-9.  
33  
34 doi: 10.1093/aje/kwv330  
35  
36  
37  
38 26. Baptiste-Roberts K, Gary TL, Beckles GL, et al. Family history of diabetes, awareness of  
39  
40 risk factors, and health behaviors among African Americans. *American journal of public*  
41  
42 *health* 2007;97(5):907-12. doi: 10.2105/AJPH.2005.077032  
43  
44  
45  
46 27. Carroll JC, Campbell-Scherer D, Permaul JA, et al. Assessing family history of chronic  
47  
48 disease in primary care: Prevalence, documentation, and appropriate screening.  
49  
50 *Canadian family physician Medecin de famille canadien* 2017;63(1):e58-e67.  
51  
52  
53  
54 28. Welch BM, Dere W, Schiffman JD. Family health history: the case for better tools. *Jama*  
55  
56 2015;313(17):1711-2. doi: 10.1001/jama.2015.2417  
57  
58  
59 29. Park HS, Park JY, Cho SI. Familial aggregation of the metabolic syndrome in Korean  
60

- 1  
2  
3  
4 families with adolescents. *Atherosclerosis* 2006;186(1):215-21. doi:  
5  
6 10.1016/j.atherosclerosis.2005.07.019  
7  
8  
9 30. Di Castelnuovo A, Quacquarello G, Donati MB, et al. Spousal concordance for major  
10  
11 coronary risk factors: a systematic review and meta-analysis. *American journal of*  
12  
13 *epidemiology* 2009;169(1):1-8. doi: 10.1093/aje/kwn234  
14  
15  
16  
17 31. Wilson PW, D'Agostino RB, Parise H, et al. Metabolic syndrome as a precursor of  
18  
19 cardiovascular disease and type 2 diabetes mellitus. *Circulation* 2005;112(20):3066-72.  
20  
21 doi: 10.1161/CIRCULATIONAHA.105.539528  
22  
23  
24  
25 32. Buscemi S, Sprini D, Grosso G, et al. Impact of lifestyle on metabolic syndrome in  
26  
27 apparently healthy people. *Eating and weight disorders : EWD* 2014;19(2):225-32. doi:  
28  
29 10.1007/s40519-014-0117-4  
30  
31  
32  
33 33. Kim MJ, Lim NK, Choi SJ, et al. Hypertension is an independent risk factor for type 2  
34  
35 diabetes: the Korean genome and epidemiology study. *Hypertension research : official*  
36  
37 *journal of the Japanese Society of Hypertension* 2015;38(11):783-9. doi:  
38  
39 10.1038/hr.2015.72  
40  
41  
42  
43 34. Meng N, Zhang Q, Yang M. Comparison of self-reported and biomedical data on  
44  
45 hypertension and diabetes: findings from the China Health and Retirement Longitudinal  
46  
47 Study (CHARLS). *BMJ open* 2016;6(1):e009836.  
48  
49  
50  
51  
52  
53  
54  
55  
56  
57

## 58 Figure legends

59  
60



1  
2  
3  
4 Figure 1 The flow chart of participates selection of the three subsamples analysis  
5

6 Figure 2 The forest plot of five chronic conditions subgroup analysis categorized by  
7  
8 gender. The plot showed the adjusted odds ratios and 95% confidence interval of the  
9  
10 association between each given chronic condition of individual with the same condition  
11  
12 of household member.  
13

14 Figure 3 The forest plot of five chronic conditions subgroup analysis categorized by  
15  
16 education status. The plot showed the adjusted odds ratios and 95% confidence interval  
17  
18 of the association between each given chronic condition of individual with the same  
19  
20 condition of household member.  
21  
22  
23  
24  
25  
26  
27  
28  
29  
30  
31  
32  
33  
34  
35  
36  
37  
38  
39  
40  
41  
42  
43  
44  
45  
46  
47  
48  
49  
50  
51  
52  
53  
54  
55  
56  
57  
58  
59  
60

Table 1 Socio-demographic characteristics of participants

| Characteristic                               | All household |                       |                    |
|----------------------------------------------|---------------|-----------------------|--------------------|
|                                              | members       | Children <sup>a</sup> | Wives <sup>b</sup> |
| <b>No. of households</b>                     | 10,198        | 4,865                 | 7,211              |
| <b>No. of participates</b>                   | 27,014        | 5,493                 | 7,845              |
| <b>Age, years, mean (SD)</b>                 | 52.63(17.06)  | 36.01(12.18)          | 54.01(13.85)       |
| <b>Male, n (%)</b>                           | 13,182(48.8)  | 3,273(59.58)          | -                  |
| <b>Education status, n (%)<sup>c,e</sup></b> |               |                       |                    |
| Illiteracy/Primary                           | 5,801(21.47)  | 334(6.08)             | 2,191(27.93)       |
| Secondary                                    | 14,484(53.62) | 2,481(45.17)          | 4,551(58.01)       |
| Collage                                      | 6,727(24.9)   | 2,678(48.75)          | 1,102(14.05)       |
| <b>Marriage status, n (%)<sup>f</sup></b>    |               |                       |                    |
| Unmarried                                    | 3,124(11.56)  | 2,286(41.62)          | -                  |
| Married                                      | 22,116(81.87) | 2,924(53.23)          | -                  |
| Divorced or widowed                          | 1,772(6.56)   | 283(5.15)             | -                  |
| <b>Insurance, n (%)</b>                      | 26,011(96.29) | 5,247(95.52)          | 7,575(96.56)       |
| <b>Drinking, n (%)</b>                       | 5,157(19.09)  | 944(17.19)            | 222(2.83)          |
| <b>Smoking, n (%)</b>                        | 6,392(23.66)  | 1,460(26.58)          | 166(2.12)          |
| <b>Chronic conditions, n (%)</b>             |               |                       |                    |
| Any chronic conditions <sup>d</sup>          | 8,467(31.34)  | 653(11.89)            | 2,414(30.77)       |
| Hypertension                                 | 7,245(26.82)  | 480(8.74)             | 2,102(26.79)       |
| Diabetes                                     | 1,875(6.94)   | 110(2)                | 498(6.35)          |
| IHD                                          | 455(1.68)     | 11(0.2)               | 117(1.49)          |
| CVD                                          | 372(1.38)     | 8(0.15)               | 106(1.35)          |
| Obesity                                      | 631(2.34)     | 128(2.33)             | 156(1.99)          |

Notes:

a The characteristics of children in parents-children subsample.

b The characteristics of wives in spouses subsample.

c "Illiteracy/Primary" in education status means the education years were from 0 to 5 years, "secondary" means the education years were from 6 to 12 years, and "collage" means the education years of residents were higher than 12 years including undergraduate and graduate degrees.

d The participants had at least one chronic condition.

IHD: Ischemic Heart Disease; CVD: Cerebrovascular Disease.

e There were 2 participates missing in education status in data set.

f There were 2 participates missing in marriage status in data set.

Table 2 The adjusted associations between one’s chronic conditions and the disease status of their own household members - Scene 1 (N = 27,010)

| Exposure:                                                | Any chronic conditions |         | Hypertension        |         | Diabetes            |         | IHD                 |         | CVD                 |         | Obesity             |         |
|----------------------------------------------------------|------------------------|---------|---------------------|---------|---------------------|---------|---------------------|---------|---------------------|---------|---------------------|---------|
| Chronic condition status of any other household members. | OR (95% CI)            | P       | OR (95% CI)         | P       | OR (95% CI)         | P       | OR (95% CI)         | P       | OR (95% CI)         | P       | OR (95% CI)         | P       |
| Any chronic conditions                                   | 3.03<br>(2.81-3.28)    | <0.0001 | 1.46<br>(1.34-1.58) | <0.0001 | 1.25<br>(1.12-1.39) | <0.0001 | 1.23<br>(1.00-1.51) | 0.0467  | 0.96<br>(0.77-1.19) | 0.6906  | 1.29<br>(1.09-1.53) | 0.0034  |
| Hypertension                                             | 1.26<br>(1.17-1.37)    | <0.0001 | 3.26<br>(3.02-3.52) | <0.0001 | 1.23<br>(1.11-1.36) | <0.0001 | 1.15<br>(0.94-1.40) | 0.1742  | 0.84<br>(0.68-1.04) | 0.1177  | 1.02<br>(0.86-1.20) | 0.8257  |
| Diabetes                                                 | 1.38<br>(1.25-1.52)    | <0.0001 | 1.19<br>(1.08-1.32) | 0.0005  | 1.68<br>(1.40-2.01) | <0.0001 | 1.06<br>(0.79-1.42) | 0.6846  | 1.10<br>(0.80-1.50) | 0.5632  | 1.36<br>(1.08-1.73) | 0.0099  |
| IHD                                                      | 1.08<br>(0.90-1.30)    | 0.3911  | 1.07<br>(0.88-1.29) | 0.5015  | 1.00<br>(0.75-1.33) | 0.9949  | 5.31<br>(3.56-7.92) | <0.0001 | 1.46<br>(0.90-2.35) | 0.1224  | 0.90<br>(0.54-1.50) | 0.6846  |
| CVD                                                      | 0.95<br>(0.77-1.16)    | 0.5856  | 0.81<br>(0.66-1.00) | 0.0526  | 1.03<br>(0.76-1.40) | 0.8473  | 1.51<br>(0.93-2.43) | 0.0951  | 3.40<br>(1.99-5.80) | <0.0001 | 0.60<br>(0.31-1.15) | 0.1251  |
| Obesity                                                  | 1.40<br>(1.18-1.66)    | 0.0001  | 1.06<br>(0.90-1.25) | 0.4697  | 1.36<br>(1.09-1.70) | 0.0076  | 0.86<br>(0.51-1.45) | 0.5663  | 0.58<br>(0.29-1.15) | 0.1172  | 3.41<br>(2.34-4.96) | <0.0001 |

Note:  
 The chronic conditions on the top of table represented the status of participants. The chronic conditions on the left of the table represented the status of any other household members. The generalized estimating equations (GEE) model was adjusted for age, gender, health insurance status, education status, drinking and smoking.

Table 3 The adjusted associations of chronic conditions between children and their own parents - Scene 2 (N = 5,489 dyads)

| Exposure:<br>chronic condition status of parents | Any chronic conditions |        | Hypertension    |        | Diabetes          |        | Obesity           |        |
|--------------------------------------------------|------------------------|--------|-----------------|--------|-------------------|--------|-------------------|--------|
|                                                  | OR (95% CI)            | P      | OR (95% CI)     | P      | OR (95% CI)       | P      | OR (95% CI)       | P      |
| Any chronic conditions                           | 5.13(4.20-6.28)        | <.0001 | 5.58(4.34-7.17) | <.0001 | 4.66(2.90-7.48)   | <.0001 | 3.02(2.07-4.42)   | <.0001 |
| Hypertension                                     | 3.93(3.25-4.75)        | <.0001 | 6.29(4.92-8.05) | <.0001 | 2.40(1.61-3.57)   | <.0001 | 1.69(1.17-2.44)   | 0.0056 |
| Diabetes                                         | 2.16(1.66-2.81)        | <.0001 | 1.61(1.16-2.25) | 0.0047 | 11.56(7.88-16.98) | <.0001 | 1.51(0.88-2.57)   | 0.1346 |
| Obesity                                          | 5.23(3.24-8.45)        | <.0001 | 1.00(0.45-2.21) | 0.9951 | 2.47(0.95-6.42)   | 0.0639 | 13.85(8.54-22.46) | <.0001 |

Note:

The chronic conditions on the top of table represented the status of children. The chronic conditions on the left of the table represented the status of their parents. The analyses of IHD and CVD were not conducted because of low prevalence rate in this subset. The generalized estimating equations (GEE) model was adjusted for age, gender, health insurance status, education status, drinking and smoking.

Table 4 The adjusted associations of chronic conditions between wife and their own husband - Scene 3 (N = 7,844 spouses)

| Exposure:                                                | Any chronic conditions |        | Hypertension        |        | Diabetes            |        | IHD                  |        | CVD                 |        | Obesity             |        |
|----------------------------------------------------------|------------------------|--------|---------------------|--------|---------------------|--------|----------------------|--------|---------------------|--------|---------------------|--------|
| chronic condition status of any other household members. | OR (95% CI)            | P      | OR (95% CI)         | P      | OR (95% CI)         | P      | OR (95% CI)          | P      | OR (95% CI)         | P      | OR (95% CI)         | P      |
| Any chronic conditions                                   | 1.58<br>(1.41-1.77)    | <.0001 | 1.55<br>(1.38-1.74) | <.0001 | 1.48<br>(1.22-1.80) | <.0001 | 1.64<br>(1.09-2.46)  | 0.0166 | 0.84<br>(0.56-1.26) | 0.3992 | 1.35<br>(0.96-1.90) | 0.0892 |
| Hypertension                                             | 1.59<br>(1.42-1.79)    | <.0001 | 1.63<br>(1.45-1.84) | <.0001 | 1.46<br>(1.20-1.77) | 0.0001 | 1.60<br>(1.08-2.37)  | 0.0182 | 0.76<br>(0.51-1.14) | 0.1783 | 1.11<br>(0.79-1.56) | 0.5353 |
| Diabetes                                                 | 1.35<br>(1.13-1.63)    | 0.0011 | 1.29<br>(1.07-1.55) | 0.0069 | 1.57<br>(1.21-2.03) | 0.0007 | 1.48<br>(0.90-2.44)  | 0.1197 | 0.57<br>(0.27-1.21) | 0.1427 | 1.02<br>(0.59-1.77) | 0.9357 |
| IHD                                                      | 1.05<br>(0.72-1.54)    | 0.7996 | 0.96<br>(0.65-1.42) | 0.8379 | 1.22<br>(0.71-2.09) | 0.4762 | 6.58<br>(3.78-11.43) | <.0001 | 1.68<br>(0.76-3.69) | 0.1994 | 1.17<br>(0.42-3.25) | 0.7684 |
| CVD                                                      | 1.10<br>(0.72-1.67)    | 0.6596 | 0.80<br>(0.52-1.23) | 0.3101 | 0.99<br>(0.54-1.82) | 0.9847 | 1.36<br>(0.53-3.48)  | 0.5263 | 3.62<br>(1.86-7.07) | 0.0002 | 1.28<br>(0.46-3.54) | 0.6403 |
| Obesity                                                  | 1.29<br>(0.90-1.85)    | 0.1670 | 0.87<br>(0.59-1.29) | 0.4888 | 1.69<br>(0.99-2.88) | 0.0553 | 1.03<br>(0.27-3.96)  | 0.9700 | 0.58<br>(0.08-4.31) | 0.5953 | 5.09<br>(2.92-8.86) | <.0001 |

Note:

The chronic conditions on the top of table represented the status of wives. The chronic conditions on the left of the table represented the status of their husband. The generalized estimating equations (GEE) model was adjusted for age, health insurance status, education status, drinking and smoking.



Notes: There were 4 participates missing in education status or marriage status in scene 1. There were 4 participates missing in education status or marriage status in scene 2. There was 1 participate missing in education status or marriage status in scene 3.

1  
2  
3  
4  
5  
6  
7  
8  
9  
10  
11  
12  
13  
14  
15  
16  
17  
18  
19  
20  
21  
22  
23  
24  
25  
26  
27  
28  
29  
30  
31  
32  
33  
34  
35  
36  
37  
38  
39  
40  
41  
42  
43  
44  
45  
46  
47  
48  
49  
50  
51  
52  
53  
54  
55  
56  
57  
58  
59  
60

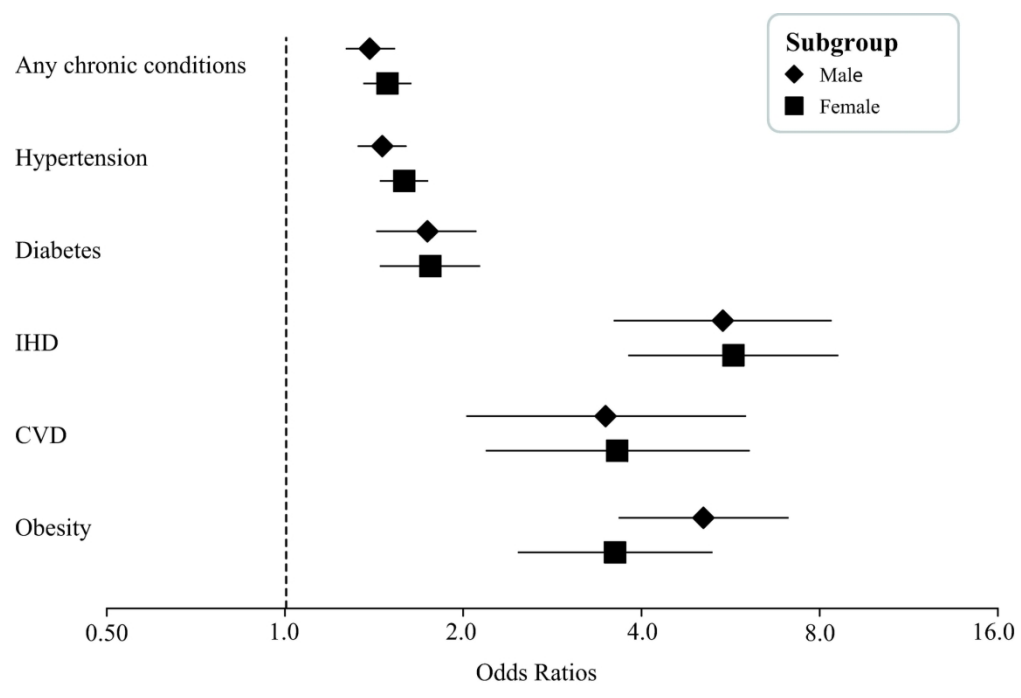

Figure 2 The forest plot of five chronic conditions subgroup analysis categorized by gender. The plot showed the adjusted odds ratios and 95% confidence interval of the association between each given chronic condition of individual with the same condition of household member.

171x115mm (300 x 300 DPI)



Figure 3 The forest plot of five chronic conditions subgroup analysis categorized by education status. The plot showed the adjusted odds ratios and 95% confidence interval of the association between each given chronic condition of individual with the same condition of household member.

204x187mm (300 x 300 DPI)



Table S1 The crude associations between one’s chronic conditions and the disease status of their own household members - Scene 1 (N = 27,010)

| Exposure:                                                | Any chronic conditions |        | Hypertension        |        | Diabetes            |        | IHD                  |        | CVD                 |        | Obesity             |        |
|----------------------------------------------------------|------------------------|--------|---------------------|--------|---------------------|--------|----------------------|--------|---------------------|--------|---------------------|--------|
| chronic condition status of any other household members. | OR (95% CI)            | P      | OR (95% CI)         | P      | OR (95% CI)         | P      | OR (95% CI)          | P      | OR (95% CI)         | P      | OR (95% CI)         | P      |
| Any chronic conditions                                   | 2.26<br>(2.26-3.81)    | <.0001 | 2.89<br>(2.69-3.10) | <.0001 | 1.49<br>(1.35-1.66) | <.0001 | 1.34<br>(1.09-1.65)  | 0.0050 | 1.35<br>(1.09-1.67) | 0.0059 | 1.30<br>(1.09-1.54) | 0.0029 |
| Hypertension                                             | 1.96<br>(1.07-3.57)    | 0.0282 | 1.65<br>(1.52-1.78) | <.0001 | 1.40<br>(1.27-1.55) | <.0001 | 1.51<br>(1.24-1.83)  | <.0001 | 1.06<br>(1.32-0.86) | 0.5683 | 1.02<br>(0.86-1.21) | 0.8048 |
| Diabetes                                                 | 1.36<br>(1.24-1.48)    | <.0001 | 1.14<br>(1.05-1.25) | 0.0031 | 1.73<br>(1.45-2.08) | <.0001 | 1.23<br>(0.93-1.63)  | 0.1493 | 1.29<br>(0.96-1.74) | 0.0910 | 1.44<br>(1.15-1.80) | 0.0015 |
| IHD                                                      | 1.40<br>(1.19-1.65)    | <.0001 | 1.40<br>(1.19-1.65) | <.0001 | 1.19<br>(0.88-1.59) | 0.2568 | 7.35<br>(5.04-10.72) | <.0001 | 2.06<br>(1.30-3.25) | 0.0019 | 0.89<br>(0.54-1.47) | 0.6472 |
| CVD                                                      | 1.20<br>(1.01-1.43)    | 0.0422 | 1.08<br>(0.89-1.29) | 0.4362 | 1.25<br>(0.95-1.66) | 0.1133 | 1.98<br>(1.26-3.13)  | 0.0032 | 4.45<br>(2.66-7.44) | <.0001 | 0.61<br>(0.31-1.18) | 0.1400 |
| Obesity                                                  | 1.22<br>(1.06-1.41)    | 0.0071 | 0.96<br>(0.83-1.11) | 0.5997 | 1.32<br>(1.07-1.64) | 0.0104 | 0.82<br>(0.50-1.36)  | 0.4434 | 0.58<br>(0.30-1.12) | 0.1056 | 3.43<br>(2.36-4.98) | <.0001 |

Note:  
 The chronic conditions on the top of table represented the status of participants. The chronic conditions on the left of the table represented the status of any other household members.

Table S2 The adjusted associations of subgroup analyses in all adult household members

| Exposure:                                                | Any chronic conditions |        | Hypertension        |        | Diabetes            |        | IHD                 |        | CVD                 |        | Obesity             |        |
|----------------------------------------------------------|------------------------|--------|---------------------|--------|---------------------|--------|---------------------|--------|---------------------|--------|---------------------|--------|
| chronic condition status of any other household members. | OR (95% CI)            | P      | OR (95% CI)         | P      | OR (95% CI)         | P      | OR (95% CI)         | P      | OR (95% CI)         | P      | OR (95% CI)         | P      |
| <b>Male</b>                                              |                        |        |                     |        |                     |        |                     |        |                     |        |                     |        |
| Any chronic conditions                                   | 1.39<br>(1.27-1.53)    | <.0001 | 1.44<br>(1.31-1.57) | <.0001 | 1.22<br>(1.07-1.41) | 0.0044 | 1.14<br>(0.85-1.53) | 0.3852 | 1.14<br>(0.84-1.56) | 0.4038 | 1.10<br>(0.87-1.39) | 0.4386 |
| Hypertension                                             | 1.38<br>(1.26-1.26)    | <.0001 | 1.46<br>(1.33-1.60) | <.0001 | 1.21<br>(1.05-1.39) | 0.0070 | 1.04<br>(0.78-1.38) | 0.8069 | 0.88<br>(0.64-1.19) | 0.4061 | 1.03<br>(0.81-1.30) | 0.8218 |
| Diabetes                                                 | 1.47<br>(1.28-1.67)    | <.0001 | 1.31<br>(1.15-1.50) | <.0001 | 1.74<br>(1.43-2.10) | <.0001 | 1.18<br>(0.78-1.77) | 0.4359 | 1.33<br>(0.88-2.03) | 0.1776 | 1.51<br>(1.09-2.09) | 0.0123 |
| IHD                                                      | 1.12<br>(0.87-1.43)    | 0.3866 | 1.12<br>(0.87-1.45) | 0.3700 | 0.93<br>(0.63-1.39) | 0.7375 | 5.49<br>(3.60-8.36) | <.0001 | 1.45<br>(0.74-2.86) | 0.2764 | 0.70<br>(0.32-1.55) | 0.3791 |
| CVD                                                      | 0.93<br>(0.70-1.24)    | 0.6254 | 0.80<br>(0.59-1.08) | 0.1487 | 0.94<br>(0.61-1.46) | 0.7936 | 1.64<br>(0.84-3.22) | 0.1484 | 3.48<br>(2.03-5.99) | <.0001 | 0.73<br>(0.30-1.73) | 0.4709 |
| Obesity                                                  | 1.47<br>(1.18-1.82)    | 0.0005 | 1.31<br>(1.06-1.61) | 0.0115 | 1.27<br>(0.93-1.74) | 0.1271 | 1.04<br>(0.52-2.07) | 0.9131 | 0.87<br>(0.40-1.93) | 0.7368 | 5.09<br>(3.67-7.07) | <.0001 |
| <b>Female</b>                                            |                        |        |                     |        |                     |        |                     |        |                     |        |                     |        |
| Any chronic conditions                                   | 1.49<br>(1.36-1.63)    | <.0001 | 1.49<br>(1.36-1.63) | <.0001 | 1.39<br>(1.21-1.60) | <.0001 | 1.31<br>(1.01-1.71) | 0.0453 | 0.91<br>(0.68-1.22) | 0.5335 | 1.36<br>(1.08-1.71) | 0.0101 |
| Hypertension                                             | 1.49<br>(1.36-1.62)    | <.0001 | 1.59<br>(1.45-1.74) | <.0001 | 1.26<br>(1.10-1.45) | 0.0011 | 1.32<br>(1.02-1.71) | 0.0365 | 0.86<br>(0.64-1.15) | 0.3052 | 1.15<br>(0.92-1.45) | 0.2201 |

1  
2  
3  
4

| Exposure:                                                | Any chronic conditions |        | Hypertension        |        | Diabetes            |        | IHD                  |        | CVD                 |        | Obesity             |        |
|----------------------------------------------------------|------------------------|--------|---------------------|--------|---------------------|--------|----------------------|--------|---------------------|--------|---------------------|--------|
| chronic condition status of any other household members. | OR (95% CI)            | P      | OR (95% CI)         | P      | OR (95% CI)         | P      | OR (95% CI)          | P      | OR (95% CI)         | P      | OR (95% CI)         | P      |
| Diabetes                                                 | 1.28<br>(1.12-1.46)    | 0.0002 | 1.28<br>(1.12-1.46) | 0.0003 | 1.76<br>(1.45-2.13) | <.0001 | 0.95<br>(0.65-1.40)  | 0.8038 | 0.95<br>(0.60-1.49) | 0.8158 | 1.32<br>(0.96-1.81) | 0.0902 |
| IHD                                                      | 1.06<br>(0.82-1.36)    | 0.6716 | 1.01<br>(0.78-1.31) | 0.9455 | 1.09<br>(0.75-1.59) | 0.6389 | 5.72<br>(3.81-8.58)  | <.0001 | 1.47<br>(0.75-2.87) | 0.2645 | 1.03<br>(0.52-2.01) | 0.9400 |
| CVD                                                      | 0.97<br>(0.74-1.26)    | 0.8189 | 0.83<br>(0.63-1.09) | 0.1782 | 1.16<br>(0.77-1.75) | 0.4648 | 1.43<br>(0.72-2.82)  | 0.3023 | 3.64<br>(2.19-6.08) | <.0001 | 0.52<br>(0.19-1.39) | 0.1907 |
| Obesity                                                  | 1.13<br>(0.90-1.42)    | 0.2994 | 1.00<br>(0.79-1.27) | 0.9974 | 1.52<br>(1.11-2.09) | 0.0100 | 0.65<br>(0.28-1.50)  | 0.3101 | 0.27<br>(0.06-1.11) | 0.0699 | 3.61<br>(2.48-5.26) | <.0001 |
| <b>Illiteracy/Primary</b>                                |                        |        |                     |        |                     |        |                      |        |                     |        |                     |        |
| Any chronic conditions                                   | 2.29<br>(2.00-2.63)    | <.0001 | 1.50<br>(1.31-1.71) | <.0001 | 1.16<br>(0.97-1.38) | 0.1064 | 0.95<br>(0.68-1.34)  | 0.7815 | 0.95<br>(0.70-1.29) | 0.7388 | 1.19<br>(0.85-1.67) | 0.3038 |
| Hypertension                                             | 1.77<br>(1.55-2.01)    | <.0001 | 2.55<br>(2.22-2.92) | <.0001 | 1.12<br>(0.94-1.33) | 0.2053 | 0.97<br>(0.70-1.35)  | 0.8688 | 0.99<br>(0.74-1.34) | 0.9727 | 1.00<br>(0.72-1.38) | 0.9855 |
| Diabetes                                                 | 1.20<br>(1.00-1.43)    | 0.0445 | 1.22<br>(1.03-1.44) | 0.0229 | 1.79<br>(1.35-2.38) | <.0001 | 0.70<br>(0.40-1.24)  | 0.2242 | 0.77<br>(0.48-1.26) | 0.3011 | 1.18<br>(0.72-1.93) | 0.5080 |
| IHD                                                      | 1.05<br>(0.74-1.48)    | 0.7975 | 0.97<br>(0.70-1.36) | 0.8720 | 0.86<br>(0.48-1.54) | 0.6177 | 6.74<br>(3.64-12.46) | <.0001 | 2.03<br>(1.05-3.92) | 0.0360 | 1.26<br>(0.48-3.36) | 0.6389 |
| CVD                                                      | 0.94<br>(0.68-1.29)    | 0.6994 | 0.85<br>(0.62-1.17) | 0.3135 | 0.83<br>(0.50-1.39) | 0.4814 | 1.86<br>(0.91-3.80)  | 0.0883 | 2.73<br>(1.32-5.64) | 0.0066 | 1.17<br>(0.49-2.81) | 0.7180 |

38  
39  
40  
41  
42  
43  
44  
45  
46

1  
2  
3  
4

| 5 Exposure:                       | Any chronic conditions |        | Hypertension        |        | Diabetes            |        | IHD                 |        | CVD                 |        | Obesity             |        |
|-----------------------------------|------------------------|--------|---------------------|--------|---------------------|--------|---------------------|--------|---------------------|--------|---------------------|--------|
| 6 chronic condition status of any | OR (95% CI)            | P      | OR (95% CI)         | P      | OR (95% CI)         | P      | OR (95% CI)         | P      | OR (95% CI)         | P      | OR (95% CI)         | P      |
| 7 other household members.        |                        |        |                     |        |                     |        |                     |        |                     |        |                     |        |
| 9                                 |                        |        |                     |        |                     |        |                     |        |                     |        |                     |        |
| 10 Obesity                        | 1.20<br>(0.91-1.58)    | 0.2047 | 1.07<br>(0.81-1.40) | 0.6397 | 1.46<br>(1.01-2.13) | 0.0450 | 1.02<br>(0.45-2.32) | 0.9649 | 0.62<br>(0.25-1.54) | 0.3065 | 3.78<br>(2.04-7.01) | <.0001 |
| 12 <b>Secondary</b>               |                        |        |                     |        |                     |        |                     |        |                     |        |                     |        |
| 14 Any chronic conditions         | 1.45<br>(1.32-1.60)    | <.0001 | 1.43<br>(1.29-1.58) | <.0001 | 1.37<br>(1.20-1.58) | <.0001 | 1.36<br>(1.02-1.83) | 0.0349 | 0.97<br>(0.69-1.37) | 0.8698 | 0.98<br>(0.78-1.24) | 0.8892 |
| 17 Hypertension                   | 1.34<br>(1.22-1.48)    | <.0001 | 1.91<br>(1.72-2.11) | <.0001 | 1.32<br>(1.16-1.51) | <.0001 | 1.37<br>(1.03-1.81) | 0.0287 | 0.76<br>(0.53-1.08) | 0.1227 | 1.00<br>(0.80-1.25) | 0.9899 |
| 20 Diabetes                       | 1.19<br>(1.04-1.36)    | 0.0090 | 1.29<br>(1.13-1.46) | 0.0001 | 1.67<br>(1.34-2.08) | <.0001 | 1.28<br>(0.87-1.90) | 0.2140 | 1.61<br>(1.02-2.53) | 0.0395 | 1.40<br>(1.03-1.90) | 0.0331 |
| 23 IHD                            | 1.05<br>(0.82-1.33)    | 0.7096 | 1.11<br>(0.86-1.42) | 0.4324 | 0.95<br>(0.65-1.39) | 0.7949 | 6.06<br>(3.68-9.97) | <.0001 | 0.81<br>(0.32-2.06) | 0.6626 | 0.51<br>(0.21-1.20) | 0.1231 |
| 26 CVD                            | 0.93<br>(0.70-1.22)    | 0.5950 | 0.83<br>(0.62-1.12) | 0.2354 | 1.33<br>(0.90-1.96) | 0.1528 | 0.81<br>(0.32-2.04) | 0.6586 | 3.90<br>(1.99-7.63) | <.0001 | 0.24<br>(0.06-0.98) | 0.0467 |
| 29 Obesity                        | 1.32<br>(1.06-1.64)    | 0.0132 | 1.14<br>(0.92-1.41) | 0.2223 | 1.28<br>(0.95-1.71) | 0.1041 | 0.73<br>(0.34-1.57) | 0.4245 | 0.67<br>(0.24-1.86) | 0.4398 | 3.05<br>(1.94-4.79) | <.0001 |
| 32 <b>Collage</b>                 |                        |        |                     |        |                     |        |                     |        |                     |        |                     |        |
| 34                                |                        |        |                     |        |                     |        |                     |        |                     |        |                     |        |
| 35 Any chronic conditions         | 1.69<br>(1.39-2.05)    | <.0001 | 1.55<br>(1.25-1.91) | <.0001 | 1.14<br>(0.83-1.58) | 0.4111 | 1.05<br>(0.63-1.75) | 0.8497 | 1.12<br>(0.56-2.23) | 0.7439 | 1.82<br>(1.25-2.67) | 0.0003 |

33  
34  
35  
36  
37  
38  
39  
40  
41  
42  
43  
44  
45  
46

1  
2  
3  
4

| Exposure:                                                | Any chronic conditions |        | Hypertension        |        | Diabetes            |        | IHD                 |        | CVD                   |        | Obesity             |         |
|----------------------------------------------------------|------------------------|--------|---------------------|--------|---------------------|--------|---------------------|--------|-----------------------|--------|---------------------|---------|
| chronic condition status of any other household members. | OR (95% CI)            | P      | OR (95% CI)         | P      | OR (95% CI)         | P      | OR (95% CI)         | P      | OR (95% CI)           | P      | OR (95% CI)         | P       |
| Hypertension                                             | 1.43<br>(1.19-1.73)    | 0.0002 | 1.64<br>(1.32-2.04) | <.0001 | 1.17<br>(0.85-1.61) | 0.3432 | 0.93<br>(0.56-1.53) | 0.7628 | 0.67<br>(0.33-1.36)   | 0.2673 | 1.62<br>(1.12-2.33) | 0.0103  |
| Diabetes                                                 | 1.70<br>(1.33-2.16)    | <.0001 | 1.60<br>(1.22-2.09) | 0.0007 | 1.48<br>(0.91-2.42) | 0.1169 | 1.23<br>(0.63-2.41) | 0.5452 | 1.22<br>(0.51-2.93)   | 0.6546 | 1.69<br>(1.08-2.65) | 0.0220  |
| IHD                                                      | 1.14<br>(0.75-1.73)    | 0.5444 | 1.02<br>(0.64-1.63) | 0.9371 | 1.28<br>(0.69-2.39) | 0.4309 | 2.41<br>(0.98-5.96) | 0.0557 | 1.68<br>(0.58-4.87)   | 0.3376 | 1.58<br>(0.67-3.70) | 0.2928  |
| CVD                                                      | 1.20<br>(0.69-2.09)    | 0.5079 | 0.72<br>(0.37-1.39) | 0.3256 | 0.57<br>(0.20-1.62) | 0.2923 | 2.32<br>(0.85-6.28) | 0.0988 | 10.19<br>(3.52-29-46) | <.0001 | 0.88<br>(0.21-3.64) | 0.8569  |
| Obesity                                                  | 2.34<br>(1.52-3.60)    | 0.0001 | 1.51<br>(0.94-2.42) | 0.0848 | 1.70<br>(0.78-3.71) | 0.1829 | 0.83<br>(0.18-3.93) | 0.8179 | -                     | -      | 4.93<br>(2.72-8.93) | <0.0001 |

Note:  
 The chronic conditions on the top of table represented the status of participants. The chronic conditions on the left of the table represented the status of any other household members. The generalized estimating equations (GEE) model was adjusted for age, gender, health insurance status, education status, marriage status, drinking and smoking. The adjusted GEE model was not fit for estimate the association between CVD and obesity in the “Collage” subgroup.

31  
32  
33  
34  
35  
36  
37  
38  
39  
40  
41  
42  
43  
44  
45  
46

Table S3 The crude associations of chronic conditions between children and their own parents - Scene 2 (N = 5,489 dyads)

| Exposure:                           | Any chronic conditions |        | Hypertension    |        | Diabetes          |        | Obesity           |        |
|-------------------------------------|------------------------|--------|-----------------|--------|-------------------|--------|-------------------|--------|
| chronic condition status of parents | OR (95% CI)            | P      | OR (95% CI)     | P      | OR (95% CI)       | P      | OR (95% CI)       | P      |
| Any chronic conditions              | 5.85(4.83-7.09)        | <.0001 | 6.60(5.25-8.28) | <.0001 | 6.36(3.98-10.18)  | <.0001 | 2.91(2.01-4.20)   | <.0001 |
| Hypertension                        | 4.52(3.77-5.41)        | <.0001 | 7.14(5.73-8.90) | <.0001 | 3.32(2.24-4.90)   | <.0001 | 1.61(1.13-2.29)   | 0.0085 |
| Diabetes                            | 2.26(1.78-2.87)        | <.0001 | 1.75(1.27-2.41) | 0.0007 | 11.28(7.65-16.62) | <.0001 | 1.57(0.93-2.67)   | 0.0941 |
| Obesity                             | 3.09(2.07-4.60)        | <.0001 | 0.82(0.39-1.73) | 0.6037 | 1.98(0.79-4.94)   | 0.1449 | 14.88(9.35-23.68) | <.0001 |

Note:

The chronic conditions on the top of table represented the status of children. The chronic conditions on the left of the table represented the status of their parents.

The analyses of IHD and CVD were not conducted because of low prevalence rate in this subset.

Table S4 The crude associations of chronic conditions between wife and their own husband - Scene 3 (N = 7,844 spouses)

| Exposure:                                                | Any chronic conditions |        | Hypertension        |        | Diabetes            |        | IHD                    |        | CVD                   |        | Obesity             |        |
|----------------------------------------------------------|------------------------|--------|---------------------|--------|---------------------|--------|------------------------|--------|-----------------------|--------|---------------------|--------|
| chronic condition status of any other household members. | OR (95% CI)            | P      | OR (95% CI)         | P      | OR (95% CI)         | P      | OR (95% CI)            | P      | OR (95% CI)           | P      | OR (95% CI)         | P      |
| Any chronic conditions                                   | 2.88<br>(2.61-3.18)    | <.0001 | 2.80<br>(2.53-3.10) | <.0001 | 2.35<br>(1.96-2.82) | <.0001 | 3.41<br>(2.32-5.02)    | <.0001 | 1.82<br>(1.24-2.67)   | 0.0022 | 1.65<br>(1.20-2.26) | 0.0020 |
| Hypertension                                             | 2.91<br>(2.63-3.22)    | <.0001 | 2.94<br>(2.65-3.26) | <.0001 | 2.31<br>(1.93-2.78) | <.0001 | 3.30<br>(2.27-4.80)    | <.0001 | 1.62<br>(1.10-2.38)   | 0.0147 | 1.39<br>(1.01-1.93) | 0.0453 |
| Diabetes                                                 | 2.09<br>(1.78-2.46)    | <.0001 | 1.97<br>(1.67-2.33) | <.0001 | 2.12<br>(1.64-2.75) | <.0001 | 2.51<br>(1.55-4.05)    | 0.0002 | 0.92<br>(0.44-1.89)   | 0.8143 | 1.20<br>(0.70-2.06) | 0.5082 |
| IHD                                                      | 2.84<br>(2.01-4.01)    | <.0001 | 2.54<br>(1.80-3.59) | <.0001 | 2.38<br>(1.44-3.95) | 0.0008 | 18.21<br>(11.18-29.63) | <.0001 | 5.01<br>(2.39-10.53)  | <.0001 | 1.55<br>(0.57-4.26) | 0.3911 |
| CVD                                                      | 2.91<br>(2.01-4.19)    | <.0001 | 2.18<br>(1.51-3.15) | <.0001 | 2.02<br>(1.15-3.55) | 0.0150 | 3.68<br>(1.58-8.53)    | 0.0025 | 10.16<br>(5.51-18.73) | <.0001 | 1.75<br>(0.64-4.80) | 0.2782 |
| Obesity                                                  | 1.02<br>(0.74-1.39)    | 0.9177 | 0.73<br>(0.51-1.04) | 0.0822 | 1.42<br>(0.84-2.38) | 0.1863 | 0.72<br>(0.18-2.94)    | 0.6484 | 0.39<br>(0.05-2.83)   | 0.3542 | 4.72<br>(2.7108.22) | <.0001 |

Note:

The chronic conditions on the top of table represented the status of wives. The chronic conditions on the left of the table represented the status of their husband.

Table S5 The results of full models for the association between chronic conditions of individual with the same condition of household member

| Factors                       | Subsample1      |         | Subsample2        |         | Subsample3      |         |
|-------------------------------|-----------------|---------|-------------------|---------|-----------------|---------|
|                               | OR(95%CI)       | P       | OR(95%CI)         | P       | OR(95%CI)       | P       |
| <b>Any chronic conditions</b> |                 |         |                   |         |                 |         |
| Same condition                | 3.03(2.81-3.28) | <0.0001 | 5.13(4.20-6.28)   | <0.0001 | 1.58(1.41-1.77) | <0.0001 |
| Age                           | 1.07(1.07-1.07) | <0.0001 | 1.08(1.08-1.09)   | <0.0001 | 1.08(1.07-1.08) | <0.0001 |
| Sex                           |                 |         |                   |         |                 |         |
| Female                        | Ref             |         | Ref               |         | -               | -       |
| Male                          | 1.16(1.07-1.26) | 0.0002  | 1.48(1.17-1.88)   | 0.0010  | -               | -       |
| Health insurance status       |                 |         |                   |         |                 |         |
| Insuranced                    | Ref             |         | Ref               |         | Ref             |         |
| No insuranced                 | 0.82(0.74-0.91) | 0.0001  | 1.02(0.62-1.68)   | 0.9319  | 1.08(0.78-1.49) | 0.6577  |
| Education status              |                 |         |                   |         |                 |         |
| Illieracy/Primary             | Ref             |         |                   |         |                 |         |
| Secenary                      | 1.22(1.11-1.34) | <0.0001 | 1.54(1.07-2.21)   | 0.0204  | 1.91(1.54-2.37) | <0.0001 |
| Collage                       | 1.34(1.23-1.45) | <0.0001 | 1.44(1.13-1.83)   | 0.0028  | 1.74(1.43-2.12) | <0.0001 |
| Smoking                       | 1.00(0.91-1.09) | 0.9306  | 1.19(0.92-1.53)   | 0.1781  | 1.01(0.70-1.48) | 0.9386  |
| Drinking                      | 0.85(0.78-0.93) | 0.0002  | 0.89(0.70-1.13)   | 0.3515  | 1.20(0.85-1.70) | 0.3001  |
| <b>Hypertension</b>           |                 |         |                   |         |                 |         |
| Same condition                | 3.26(3.02-3.52) | <0.0001 | 6.29(4.92-8.05)   | <0.0001 | 1.63(1.45-1.84) | <0.0001 |
| Age                           | 1.07(1.07-1.07) | <0.0001 | 1.12(1.11-1.13)   | <0.0001 | 1.08(1.07-1.08) | <0.0001 |
| Sex                           |                 |         |                   |         |                 |         |
| Female                        | Ref             |         | Ref               |         | -               | -       |
| Male                          | 1.10(1.01-1.20) | 0.0247  | 1.26(0.94-1.70)   | 0.1247  | -               | -       |
| Health insurance status       |                 |         |                   |         |                 |         |
| Insuranced                    | Ref             |         | Ref               |         | Ref             |         |
| No insuranced                 | 0.98(0.87-1.11) | 0.7680  | 0.73(0.39-1.37)   | 0.3310  | 0.98(0.70-1.37) | 0.9004  |
| Education status              |                 |         |                   |         |                 |         |
| Illieracy/Primary             | Ref             |         | Ref               |         | Ref             |         |
| Secenary                      | 1.32(1.20-1.45) | <0.0001 | 1.56(1.01-2.41)   | 0.0435  | 1.92(1.53-2.40) | <0.0001 |
| Collage                       | 1.39(1.28-1.51) | <0.0001 | 1.50(1.10-2.03)   | 0.0093  | 1.76(1.42-2.17) | <0.0001 |
| Smoking                       | 1.03(0.94-1.13) | 0.5309  | 1.13(0.84-1.53)   | 0.4109  | 1.11(0.75-1.65) | 0.6052  |
| Drinking                      | 0.77(0.70-0.84) | <0.0001 | 0.71(0.54-0.94)   | 0.0166  | 1.22(0.85-1.75) | 0.2834  |
| <b>Diabetes</b>               |                 |         |                   |         |                 |         |
| Same condition                | 1.68(1.40-2.01) | <0.0001 | 11.56(7.88-16.98) | <0.0001 | 1.57(1.21-2.03) | 0.0007  |
| Age                           | 1.05(1.04-1.06) | <0.0001 | 1.08(1.06-1.10)   | <0.0001 | 1.05(1.05-1.06) | <0.0001 |
| Sex                           |                 |         |                   |         |                 |         |
| Female                        | Ref             |         | Ref               |         | -               | -       |
| Male                          | 1.05(0.91-1.20) | 0.5013  | 1.45(0.88-2.37)   | 0.1409  | -               | -       |
| Health insurance status       |                 |         |                   |         |                 |         |
| Insuranced                    | Ref             |         | Ref               |         |                 |         |



|    |                         |                 |         |                   |         |                  |         |
|----|-------------------------|-----------------|---------|-------------------|---------|------------------|---------|
| 1  | No insureded            | 0.29(0.06-1.48) | 0.1362  | 0.94(0.30-2.93)   | 0.9158  | 0.86(0.46-1.59)  | 0.6258  |
| 2  | Education status        |                 |         |                   |         |                  |         |
| 3  | Illieracy/Primary       | Ref             |         | Ref               |         | Ref              |         |
| 4  | Seconary                | 1.00(0.79-1.27) | 0.9867  | 2.34(1.04-5.27)   | 0.0410  | 2.23(1.41-3.53)  | 0.0006  |
| 5  | Collage                 | 1.35(1.17-1.55) | <0.0001 | 2.66(1.45-4.87)   | 0.0016  | 2.15(1.40-3.31)  | 0.0005  |
| 6  | Smoking                 | 0.84(0.73-0.96) | 0.0130  | 1.17(0.73-1.89)   | 0.5071  | 0.72(0.41-1.29)  | 0.2728  |
| 7  | Drinking                | 1.12(0.98-1.29) | 0.0943  | 1.11(0.69-1.79)   | 0.6780  | 1.32(0.69-2.53)  | 0.4069  |
| 8  |                         |                 |         |                   |         |                  |         |
| 9  |                         |                 |         |                   |         |                  |         |
| 10 | IHD                     |                 |         |                   |         |                  |         |
| 11 | Same condition          | 5.31(3.56-7.92) | <0.0001 | -                 | -       | 6.58(3.78-11.43) | <0.0001 |
| 12 | Age                     | 1.06(1.05-1.07) | <0.0001 | -                 | -       | 1.11(1.09-1.12)  | <0.0001 |
| 13 | Sex                     |                 |         |                   |         |                  |         |
| 14 | Female                  | Ref             |         | Ref               |         | -                | -       |
| 15 | Male                    | 0.85(0.64-1.12) | 0.2523  | -                 | -       | -                | -       |
| 16 | Health insurance status |                 |         |                   |         |                  |         |
| 17 | Insureded               | Ref             |         | Ref               |         | Ref              |         |
| 18 | No insureded            | 0.52(0.16-1.69) | 0.2753  | -                 | -       | 1.39(0.41-4.73)  | 0.5993  |
| 19 | Education status        |                 |         |                   |         |                  |         |
| 20 | Illieracy/Primary       | Ref             |         |                   |         |                  |         |
| 21 | Seconary                | 0.60(0.43-0.84) | 0.0025  | -                 | -       | 0.39(0.20-0.78)  | 0.0072  |
| 22 | Collage                 | 0.87(0.70-1.10) | 0.2495  | -                 | -       | 0.88(0.47-1.65)  | 0.6853  |
| 23 | Smoking                 | 1.10(0.83-1.46) | 0.5087  | -                 | -       | 2.16(0.28-16.40) | 0.4584  |
| 24 | Drinking                | 1.09(0.81-1.46) | 0.5672  | -                 | -       | 0.42(0.18-0.98)  | 0.0458  |
| 25 |                         |                 |         |                   |         |                  |         |
| 26 |                         |                 |         |                   |         |                  |         |
| 27 | CVD                     |                 |         |                   |         |                  |         |
| 28 | Same condition          | 3.40(1.99-5.80) | <0.0001 | -                 | -       | 3.62(1.86-7.07)  | 0.0002  |
| 29 | Age                     | 1.08(1.07-1.09) | <0.0001 | -                 | -       | 1.10(1.08-1.12)  | <0.0001 |
| 30 | Sex                     |                 |         |                   |         |                  |         |
| 31 | Female                  | Ref             |         | Ref               |         | -                | -       |
| 32 | Male                    | 1.20(0.94-1.54) | 0.1491  | -                 | -       | -                | -       |
| 33 | Health insurance status |                 |         |                   |         |                  |         |
| 34 | Insureded               | Ref             |         | Ref               |         | Ref              |         |
| 35 | No insureded            | 0.73(0.38-1.40) | 0.3380  | -                 | -       | 1.23(0.35-4.31)  | 0.7483  |
| 36 | Education status        |                 |         |                   |         |                  |         |
| 37 | Illieracy/Primary       | Ref             |         | Ref               |         | Ref              |         |
| 38 | Seconary                | 1.59(1.13-2.24) | 0.0072  | -                 | -       | 1.25(0.55-2.81)  | 0.5940  |
| 39 | Collage                 | 1.24(0.90-1.72) | 0.1899  | -                 | -       | 1.15(0.51-2.60)  | 0.7410  |
| 40 | Smoking                 | 1.34(0.97-1.84) | 0.0781  | -                 | -       | 1.61(0.21-12.13) | 0.6429  |
| 41 | Drinking                | 1.32(0.96-1.80) | 0.0867  | -                 | -       | 2.57(0.34-19.52) | 0.3603  |
| 42 |                         |                 |         |                   |         |                  |         |
| 43 |                         |                 |         |                   |         |                  |         |
| 44 | Obesity                 |                 |         |                   |         |                  |         |
| 45 | Same condition          | 3.41(2.34-4.96) | <0.0001 | 13.85(8.54-22.46) | <0.0001 | 5.09(2.92-8.86)  | <0.0001 |
| 46 | Age                     | 1.01(1.00-1.02) | 0.0462  | 1.00(0.98-1.02)   | 0.8932  | 1.02(1.01-1.04)  | 0.0015  |
| 47 | Sex                     |                 |         |                   |         |                  |         |
| 48 | Female                  | Ref             |         | Ref               |         | -                | -       |
| 49 | Male                    | 1.08(0.88-1.33) | 0.4682  | 2.04(1.31-3.17)   | 0.0017  | -                | -       |

## Health insurance status

|    |                   |                 |        |                 |        |                 |        |
|----|-------------------|-----------------|--------|-----------------|--------|-----------------|--------|
| 1  | Insuranced        | Ref             |        | Ref             |        | Ref             |        |
| 2  |                   |                 |        |                 |        |                 |        |
| 3  | No insuranced     | 0.37(0.06-2.09) | 0.2588 | 1.18(0.55-2.53) | 0.6670 | 1.56(0.72-3.41) | 0.2630 |
| 4  | Education status  |                 |        |                 |        |                 |        |
| 5  |                   |                 |        |                 |        |                 |        |
| 6  | Illieracy/Primary | Ref             |        | Ref             |        | Ref             |        |
| 7  | Seconary          | 0.87(0.56-1.35) | 0.5298 | 1.08(0.44-2.64) | 0.8624 | 2.06(0.98-4.32) | 0.0558 |
| 8  |                   |                 |        |                 |        |                 |        |
| 9  | Collage           | 1.04(0.81-1.34) | 0.7469 | 1.27(0.82-1.98) | 0.2858 | 2.11(1.06-4.20) | 0.0339 |
| 10 | Smoking           | 1.11(0.89-1.39) | 0.3468 | 1.14(0.69-1.89) | 0.6041 | 1.22(0.38-3.86) | 0.7376 |
| 11 |                   |                 |        |                 |        |                 |        |
| 12 | Drinking          | 1.02(0.82-1.26) | 0.8914 | 1.47(0.83-2.58) | 0.1846 | 0.89(0.37-2.17) | 0.8004 |

For peer review only

## Supplementary S1 The STROBE checklist

STROBE Statement—Checklist of items that should be included in reports of *cross-sectional studies*

|                           | <b>Item No</b> | <b>Recommendation</b>                                                                                                           | <b>Check</b>                                                                                                                                                                                                                                    | <b>Page</b>        |
|---------------------------|----------------|---------------------------------------------------------------------------------------------------------------------------------|-------------------------------------------------------------------------------------------------------------------------------------------------------------------------------------------------------------------------------------------------|--------------------|
| <b>Title and abstract</b> | 1              | (a) Indicate the study's design with a commonly used term in the title or the abstract                                          | Yes. We had indicated that this study is a cross-sectional study in title.                                                                                                                                                                      | Page 1             |
|                           |                | (b) Provide in the abstract an informative and balanced summary of what was done and what was found                             | Yes. These information was listed in "Abstract".                                                                                                                                                                                                | Page 2             |
| <b>Introduction</b>       |                |                                                                                                                                 |                                                                                                                                                                                                                                                 |                    |
| Background/rationale      | 2              | Explain the scientific background and rationale for the investigation being reported                                            | Yes. The research about the concordance of chronic conditions among the household members could cause people and health management department to pay attention to the effect of co-residence factor in the prevalence of some chronic diseases. | Page 3             |
| Objectives                | 3              | State specific objectives, including any prespecified hypotheses                                                                | Yes. We did effort to test and explore the hypothesis that whether one's chronic conditions are related to the others with chronic conditions living in the same household.                                                                     | Page 4             |
| <b>Methods</b>            |                |                                                                                                                                 |                                                                                                                                                                                                                                                 |                    |
| Study design              | 4              | Present key elements of study design early in the paper                                                                         | Yes. The data for this study was from the fifth Health Service Survey of Shanghai in 2013 (the extension of China's National Health Service Survey-NHSS), and this is a cross-sectional survey study.                                           | Page 5 -<br>Page 6 |
| Setting                   | 5              | Describe the setting, locations, and relevant dates, including periods of recruitment, exposure, follow-up, and data collection | Yes. This health survey was conducted in Shanghai, China, in 2013. Details could be found in "Data source" section.                                                                                                                             | Page 5             |
| Participants              | 6              | (a) Give the eligibility criteria, and the sources and methods of selection of participants                                     | Yes. In our study, we included the households with at least two adults who aged 18 or older.                                                                                                                                                    | Page 6             |
| Variables                 | 7              | Clearly define all outcomes, exposures,                                                                                         | Yes. We chose five chronic                                                                                                                                                                                                                      | Page 6             |

|                           |    |                                                                                                                                                                                      |                                                                                                                                                                                                                                                                                                                                                                              |                         |
|---------------------------|----|--------------------------------------------------------------------------------------------------------------------------------------------------------------------------------------|------------------------------------------------------------------------------------------------------------------------------------------------------------------------------------------------------------------------------------------------------------------------------------------------------------------------------------------------------------------------------|-------------------------|
|                           |    | predictors, potential confounders, and effect modifiers. Give diagnostic criteria, if applicable                                                                                     | conditions with high prevalence: hypertension, diabetes, Ischemic heart disease (IHD), cerebrovascular disease (CVD), obesity. Details could be found in “Five chronic conditions” section.                                                                                                                                                                                  |                         |
| Data sources/ measurement | 8* | For each variable of interest, give sources of data and details of methods of assessment (measurement). Describe comparability of assessment methods if there is more than one group | Yes. These five chronic conditions were from the self-reported records in the questionnaires, and we chose these diseases according to the disease coding list of the NHSS.                                                                                                                                                                                                  | Page5 - Page6           |
| Bias                      | 9  | Describe any efforts to address potential sources of bias                                                                                                                            | Yes. Some socio-demographic characteristics would be included in our analyses as covariates: Age, gender, education status, marriage status, health insurance status, smoking, drinking.                                                                                                                                                                                     | Page 7                  |
| Study size                | 10 | Explain how the study size was arrived at                                                                                                                                            | Yes. A total of 10,198 households (27,014 participants) with at least two adults who aged 18 or older were included in our study, and details could be found in figure 1.                                                                                                                                                                                                    | Page8 – Page9, Figure 1 |
| Quantitative variables    | 11 | Explain how quantitative variables were handled in the analyses. If applicable, describe which groupings were chosen and why                                                         | Yes. Then the generalized estimating equations (GEE) model with logit link would be used to find out the relationship between one’s chronic conditions and the others with chronic conditions living in the same household. And we would estimate these associations in three different household scenes: all household members, dyads of parents and children, and spouses. | Page 8                  |
| Statistical methods       | 12 | (a) Describe all statistical methods, including those used to control for                                                                                                            | Yes. Then the generalized estimating equations (GEE)                                                                                                                                                                                                                                                                                                                         | Page 8                  |

1  
2  
3  
4  
5  
6  
7  
8  
9  
10  
11  
12  
13  
14  
15  
16  
17  
18  
19  
20  
21  
22  
23  
24  
25  
26  
27  
28  
29  
30  
31  
32  
33  
34  
35  
36  
37  
38  
39  
40  
41  
42  
43  
44  
45  
46  
47  
48  
49  
50  
51  
52  
53  
54  
55  
56  
57  
58  
59  
60

confounding

model with logit link would be used in our study with adjusting for age, gender, health insurance status, education status, marriage status, drinking and smoking.

(b) Describe any methods used to examine subgroups and interactions

Yes. The subgroup analyses would be conducted in all household members scene according to two pre-defined stratification factors: sex (male or female), education (illiteracy/primary, secondary, and college).

Page 8

(c) Explain how missing data were addressed

Yes. We did not conducted any statistical model to deal with the missing data because of low missing data rate. The observation with missing data would be excluded from the final analyses.

Page 8

(d) If applicable, describe analytical methods taking account of sampling strategy

Yes. The GEE model would be applicable to household data.

Page 8

(e) Describe any sensitivity analyses

Yes. We also conducted crude GEE models to find out the relationship.

Page 8

## Results

Participants

13\*

(a) Report numbers of individuals at each stage of study—eg numbers potentially eligible, examined for eligibility, confirmed eligible, included in the study, completing follow-up, and analysed

Yes. The details could be found in the first paragraph of “Results” and figure 1.

Page 8 –  
Page 9,  
Figure 1

(b) Give reasons for non-participation at each stage

Yes. The details could be found in the first paragraph of “Results” and figure 1.

Page 8 –  
Page 9,  
Figure 1

(c) Consider use of a flow diagram

Yes. The figure 1 is a flow diagram.

Figure 1

Descriptive data

14\*

(a) Give characteristics of study participants (eg demographic, clinical, social) and information on exposures and potential confounders

Yes. The details could be found in the first paragraph of “Results” and table 1.

Page 9,  
Table 1

(b) Indicate number of participants with missing data for each variable of interest

Yes. The details could be found in the first paragraph of “Results” and figure 1.

Page 8 –  
Page 9,  
Figure 1

|                   |     |                                                                                                                                                                                                                                                                                                                                                                                                               |                                                                                                                                                                                                                                                                                                                            |                    |
|-------------------|-----|---------------------------------------------------------------------------------------------------------------------------------------------------------------------------------------------------------------------------------------------------------------------------------------------------------------------------------------------------------------------------------------------------------------|----------------------------------------------------------------------------------------------------------------------------------------------------------------------------------------------------------------------------------------------------------------------------------------------------------------------------|--------------------|
| Outcome data      | 15* | Report numbers of outcome events or summary measures                                                                                                                                                                                                                                                                                                                                                          | Yes. The details could be found in table 1.                                                                                                                                                                                                                                                                                | Table 1            |
| Main results      | 16  | (a) Give unadjusted estimates and, if applicable, confounder-adjusted estimates and their precision (eg, 95% confidence interval). Make clear which confounders were adjusted for and why they were included<br>(b) Report category boundaries when continuous variables were categorized<br>(c) If relevant, consider translating estimates of relative risk into absolute risk for a meaningful time period | Yes. The final conclusion was based on the results of the adjusted models. The results of adjusted model were listed in table 2-4, and those of crude model were available in the supplemental tables.                                                                                                                     | Table 2 – 4        |
| Other analyses    | 17  | Report other analyses done—eg analyses of subgroups and interactions, and sensitivity analyses                                                                                                                                                                                                                                                                                                                | Yes. The results of subgroup analyses were shown in figure 2 and supplemental table S2.                                                                                                                                                                                                                                    | Figure2 & Table S2 |
| <b>Discussion</b> |     |                                                                                                                                                                                                                                                                                                                                                                                                               |                                                                                                                                                                                                                                                                                                                            |                    |
| Key results       | 18  | Summarise key results with reference to study objectives                                                                                                                                                                                                                                                                                                                                                      | Yes. We found that the participants who live with the household members with chronic conditions were associated with 46% higher OR of having one or more chronic condition. For these five chronic conditions, the above relationship was observed in each same chronic condition.                                         | Page 11            |
| Limitations       | 19  | Discuss limitations of the study, taking into account sources of potential bias or imprecision. Discuss both direction and magnitude of any potential bias                                                                                                                                                                                                                                                    | Yes. We discussed four points of limitation in the “Discussion” section.                                                                                                                                                                                                                                                   | Page 14            |
| Interpretation    | 20  | Give a cautious overall interpretation of results considering objectives, limitations, multiplicity of analyses, results from similar studies, and other relevant evidence                                                                                                                                                                                                                                    | Yes. The evidence about the effect of co-residence factor in some chronic conditions would suggest that people should pay more attention to their health status, especially those whose household members have chronic conditions. And the mechanisms about these associations should be investigated by further research. | Page 13 – Page 14  |

1  
2  
3  
4  
5  
6  
7  
8  
9

|                  |    |                                                                       |                                                                                                                                   |                      |
|------------------|----|-----------------------------------------------------------------------|-----------------------------------------------------------------------------------------------------------------------------------|----------------------|
| Generalisability | 21 | Discuss the generalisability (external validity) of the study results | Yes. The relationships of chronic conditions among the household members were consistent in three different scenes and subgroups. | Page 13 –<br>Page 14 |
|------------------|----|-----------------------------------------------------------------------|-----------------------------------------------------------------------------------------------------------------------------------|----------------------|

10

**Other information**11  
12  
13  
14  
15  
16  
17  
18  
19  
20  
21  
22  
23

|         |    |                                                                                                                                                               |                                                                                                                                                                                                                    |         |
|---------|----|---------------------------------------------------------------------------------------------------------------------------------------------------------------|--------------------------------------------------------------------------------------------------------------------------------------------------------------------------------------------------------------------|---------|
| Funding | 22 | Give the source of funding and the role of the funders for the present study and, if applicable, for the original study on which the present article is based | This study was conducted under a grant from the Fourth Round of Shanghai Three-year Action Plan on Public Health Discipline and Talent Program: Evidence-based Public Health and Health Economics(No. 15GWZK0901). | Page 16 |
|---------|----|---------------------------------------------------------------------------------------------------------------------------------------------------------------|--------------------------------------------------------------------------------------------------------------------------------------------------------------------------------------------------------------------|---------|

24  
25

\*Give information separately for exposed and unexposed groups.

26  
27  
28  
29  
30  
31  
32  
33

**Note:** An Explanation and Elaboration article discusses each checklist item and gives methodological background and published examples of transparent reporting. The STROBE checklist is best used in conjunction with this article (freely available on the Web sites of PLoS Medicine at <http://www.plosmedicine.org/>, Annals of Internal Medicine at <http://www.annals.org/>, and Epidemiology at <http://www.epidem.com/>). Information on the STROBE Initiative is available at [www.strobe-statement.org](http://www.strobe-statement.org).

34  
35  
36  
37  
38  
39  
40  
41  
42  
43  
44  
45  
46  
47  
48  
49  
50  
51  
52  
53  
54  
55  
56  
57  
58  
59  
60

# Statistical Analysis Plan

## Study design and background

From 1993 to 2013, the NHSS has been conducted for five times (every five years) which is a cross-sectional survey. The latest one was conducted in 2013, which was the fifth one. The 5<sup>th</sup> Health Service Survey of Shanghai was the extension of 5<sup>th</sup> NHSS. This survey was organized and conducted by the Shanghai Municipal Commission Health and Family Planning. The sampling method and quality assurance measures used in Shanghai survey were consistent with the national sampling approach and principle. The 5<sup>th</sup> Health Service Survey of Shanghai cover all of the 17 districts in Shanghai, and a three-stage, stratified, random sampling method was adopted. First stage, 100 towns/townships were selected randomly from all these 17 districts. Second stage, one thousand villages/communities were sampled randomly from these selected towns/townships. Third stage, about 12,000 households were identified randomly.

A face-to-face interview approach using structured household questionnaire, which was developed by the National Commission Health and Family Planning of China, was conducted for each household. The questionnaire contained the general information of household, the demographic characteristics of residents, the relationship of household members, self-reported illness and injury, outpatient and inpatient information.

To ensure the quality of this survey, some quality assurance measures were applied during the process of data collection. Logic errors would be checked among the data by survey constitutors. If there were logic errors, the investigators would contact the household members and verify the relevant information. The accuracy of data information were assessed by revisit-approach. The investigators revisited 5% of the sampled households and collected ten key questions to check the consistency of the information recorded. The consistency rates between these two visits was near to 99 %.

## Objective

The aim of our study is to estimate the association between an adult's own chronic condition status and the chronic condition status of other household members.

## Data management

Those who meet the following conditions will be excluded.

1. Residents less than 18 years old
2. Only one person in a household

Because the NHSS of Shanghai conducted well, there is little data missing in the data set. If one resident missed some important variables, he/she will be excluded from analyses.

## Outcomes

We choose five chronic conditions with high prevalence in this survey: hypertension, diabetes, ischemic heart disease (IHD), cerebrovascular disease (CVD), and obesity. The definition of these chronic conditions is based on the question in the questionnaire,



1  
2  
3 the disease coding list of the NHSS, and Body mass index (BMI).

4 **Hypertension:** Hypertension for every resident is indicated based on the question in  
5 the questionnaire “Have you ever been told by a doctor that you have hypertension”. If  
6 one choose “YES”, the hypertension status of the participant is “1”. If the one choose  
7 “NO”, the hypertension status of the participant is “0”.  
8  
9

10 **Diabetes:** Diabetes for every resident is indicated based on the question in the  
11 questionnaire “Have you ever been told by a doctor that you have diabetes”. If one  
12 choose “YES”, the diabetes status of the participant is “1”. If the one choose “NO”, the  
13 diabetes status of the participant is “0”.  
14

15 **IHD:** The questionnaire will record all of the chronic diseases for every resident, and  
16 these chronic diseases will be encoded in accordance with the disease coding list of  
17 the NHSS. IHD included angina pectoris (061), myocardial infarction (062), and other  
18 ischemic heart disease (063). If one choose any of these three codes, the IHD status of  
19 the participant is “1”. If the one did not choose any of these three codes, the IHD status  
20 of the participant is “0”.  
21  
22

23 **CVD:** This chronic condition will be indicated according to the disease coding list of  
24 the NHSS: cerebrovascular disease (067). If one choose this code, the CVD status of  
25 the participant is “1”. If the one did not choose this code, the CVD status of the  
26 participant is “0”.  
27

28 **Obesity:** Body mass index (BMI) will be calculated for every resident by height and  
29 weight. Obesity was indicated by the World Health Organization (WHO) International  
30 BMI categories ( $BMI \geq 30 \text{ kg/m}^2$ ). If the BMI of the one is equal or over  $30 \text{ kg/m}^2$ , the  
31 obesity status of the participant is “1”. If the BMI of the one is lower than  $30 \text{ kg/m}^2$ , the  
32 obesity status of the participant is “0”.  
33

34 **Any chronic conditions:** If any of these five chronic conditions is “Yes” for a  
35 participant, his or her status of “Any chronic conditions” is “Yes”, otherwise “Any  
36 chronic conditions” is “No”.  
37  
38

### 39 **Covariates**

40  
41 Socio-demographic characteristics added to our models as covariates include age  
42 (continuously specified in years), education status (illiteracy/primary, secondary or  
43 college), health insurance status (yes or no), marriage status (married, unmarried,  
44 divorced or widowed), smoking (yes or no), and drinking (yes or no). Except the  
45 analyses of spouse subsample, gender (male or female) and is also included as a  
46 covariate.  
47  
48

### 49 **Subsamples**

50  
51 To make a comprehensive estimation for the association, we conduct the analyses in  
52 three subsamples: all adult household members, adult children, and wives.  
53

54 **Subsample 1 all adult household members:** We can estimate the general association  
55 between an adult’s own chronic condition status and the chronic condition status of  
56 other household members based on this subsample. The chronic condition status of  
57 participant is treated as outcome, and the household situation of chronic condition for  
58 each participant is treated as exposure factor. If any other residents (excluding self)  
59  
60

1  
2  
3 have the given chronic conditions, the exposure for the one is “YES”.

4 **Subsample 2 adult children:** We only include adult children (age > 18 years old) in  
5 this subsample, and those participants are excluded if the disease information of parents  
6 were not available. The chronic conditions status of their parents are considered as  
7 exposure, and the chronic condition status of adult children is treated as outcome. If  
8 any of the one’s parents have the given chronic conditions, the exposure for the one is  
9 “YES”. The results of this subsample might show the effect of genetic factors and  
10 common living environment in the relationships that we are interested in.

11 **Subsample 3 wives:** we include married women in the analyses. We define the chronic  
12 condition of wife as the outcome and the chronic condition of husband as the exposure.  
13 The results of this subsample might show the effect of common living environment  
14 without genetic ties in the relationships that we are interested in.  
15  
16  
17  
18  
19

## 20 21 **Statistical analysis**

### 22 **Descriptive analyses**

23 Descriptive statistics are summarized for the covariates of three subsamples,  
24 respectively. Mean (standard deviation, SD) is calculated for continuous variables, and  
25 counts (percentages) are calculated for categorical variables.  
26  
27

### 28 **Generalized Estimating Equations**

29 The generalized estimating equations (GEE) model with logit link will be used to find  
30 out the relationship between one’s chronic conditions and the others with chronic  
31 conditions living in the same household. We consider two-level hierarchical structure  
32 of the model (individual within household), and choose the exchangeable working  
33 correlation matrix for GEE model. The GEE model is performed using “GENMOD”  
34 procedure in SAS software. The analyses model is based on individual’s data without  
35 considering sampling weight, because there is no relevant information.  
36  
37

38 The adjusted GEE models will include age, gender, health insurance status, education  
39 status, drinking and smoking (gender is excluded in the third subsample). The chronic  
40 condition status of participants is included in models as independent variable. And the  
41 exposure (status of other members) is included in models as dependent variable. The  
42 final conclusion will be based on the results of the adjusted models.  
43  
44

45 The odds ratio (OR) and 95% confidence interval (CI) are estimated by GEE model to  
46 indicate the association between any chronic condition or each given chronic condition  
47 of individual with the same condition of household member (e.g., the association  
48 between the hypertensive status of a participants and that same condition in his or her  
49 other household members). And the association of different chronic condition will also  
50 be assessed (e.g., the association between hypertension in a participant and diabetes in  
51 other household members).  
52  
53

### 54 **Sensitivity analysis**

55 We will also estimate the unadjusted odds ratio and 95% confidence interval as  
56 sensitivity analysis. And the unadjusted results are required by the STROBE checklist.  
57

### 58 **Subgroup analysis**

59 We plan to perform two subgroup analysis. One is by gender (male or female) and the  
60

1  
2  
3 other is by education status (illiteracy/primary, secondary or collage). Illiteracy/primary  
4 means the education years were from 0 to 5 years, secondary means the education years  
5 were from 6 to 12 years, and collage means the education years of residents were higher  
6 than 12 years including undergraduate and graduate degrees. The reason why we  
7 perform this two subgroup analysis is this two factors may have a significant influence  
8 on living habits which is the cause of chronic conditions.  
9

### 11 **Other information**

12 All data management and statistical analyses will be performed using SAS software  
13 (version 9.4; SAS Institute Inc., Cary, NC). All reported p values are two-sided and p  
14 value < 0.05 is regarded as statistically significant. This study will be reported  
15 according to the Strengthening the Reporting of Observational studies in Epidemiology  
16 (STROBE) guidelines.  
17  
18  
19  
20  
21  
22  
23  
24  
25  
26  
27  
28  
29  
30  
31  
32  
33  
34  
35  
36  
37  
38  
39  
40  
41  
42  
43  
44  
45  
46  
47  
48  
49  
50  
51  
52  
53  
54  
55  
56  
57  
58  
59  
60
