# Supplementary material for: Concordance of chronic conditions among the household members in Shanghai: a cross-sectional study
Source: PubMed Central journal article supplement — BMJ Open. 2019 Dec 22;9(12):e031240. doi: 10.1136/bmjopen-2019-031240 (PMC6937075; doi:10.1136/bmjopen-2019-031240), 2019-12-22
Supplement: bmjopen-2019-031240supp003.pdf [file bmjopen-2019-031240supp003.pdf]

Table S1 The crude associations between one's chronic conditions and the disease status of their own household members - Scene 1 (N = 27,010)

| Exposure:<br>chronic condition status of any<br>other household members. | Any chronic conditions |        | Hypertension        |        | Diabetes            |        | IHD                  |        | CVD                 |        | Obesity             |        |
|--------------------------------------------------------------------------|------------------------|--------|---------------------|--------|---------------------|--------|----------------------|--------|---------------------|--------|---------------------|--------|
|                                                                          | OR (95% CI)            | P      | OR (95% CI)         | P      | OR (95% CI)         | P      | OR (95% CI)          | P      | OR (95% CI)         | P      | OR (95% CI)         | P      |
| Any chronic conditions                                                   | 2.26<br>(2.26-3.81)    | <.0001 | 2.89<br>(2.69-3.10) | <.0001 | 1.49<br>(1.35-1.66) | <.0001 | 1.34<br>(1.09-1.65)  | 0.0050 | 1.35<br>(1.09-1.67) | 0.0059 | 1.30<br>(1.09-1.54) | 0.0029 |
| Hypertension                                                             | 1.96<br>(1.07-3.57)    | 0.0282 | 1.65<br>(1.52-1.78) | <.0001 | 1.40<br>(1.27-1.55) | <.0001 | 1.51<br>(1.24-1.83)  | <.0001 | 1.06<br>(1.32-0.86) | 0.5683 | 1.02<br>(0.86-1.21) | 0.8048 |
| Diabetes                                                                 | 1.36<br>(1.24-1.48)    | <.0001 | 1.14<br>(1.05-1.25) | 0.0031 | 1.73<br>(1.45-2.08) | <.0001 | 1.23<br>(0.93-1.63)  | 0.1493 | 1.29<br>(0.96-1.74) | 0.0910 | 1.44<br>(1.15-1.80) | 0.0015 |
| IHD                                                                      | 1.40<br>(1.19-1.65)    | <.0001 | 1.40<br>(1.19-1.65) | <.0001 | 1.19<br>(0.88-1.59) | 0.2568 | 7.35<br>(5.04-10.72) | <.0001 | 2.06<br>(1.30-3.25) | 0.0019 | 0.89<br>(0.54-1.47) | 0.6472 |
| CVD                                                                      | 1.20<br>(1.01-1.43)    | 0.0422 | 1.08<br>(0.89-1.29) | 0.4362 | 1.25<br>(0.95-1.66) | 0.1133 | 1.98<br>(1.26-3.13)  | 0.0032 | 4.45<br>(2.66-7.44) | <.0001 | 0.61<br>(0.31-1.18) | 0.1400 |
| Obesity                                                                  | 1.22<br>(1.06-1.41)    | 0.0071 | 0.96<br>(0.83-1.11) | 0.5997 | 1.32<br>(1.07-1.64) | 0.0104 | 0.82<br>(0.50-1.36)  | 0.4434 | 0.58<br>(0.30-1.12) | 0.1056 | 3.43<br>(2.36-4.98) | <.0001 |

Note:

The chronic conditions on the top of table represented the status of participants. The chronic conditions on the left of the table represented the status of any other household members.

Table S2 The adjusted associations of subgroup analyses in all adult household members

| Exposure:<br>chronic condition status of any<br>other household members. | Any chronic conditions |        | Hypertension        |        | Diabetes            |        | IHD                 |        | CVD                 |        | Obesity             |        |
|--------------------------------------------------------------------------|------------------------|--------|---------------------|--------|---------------------|--------|---------------------|--------|---------------------|--------|---------------------|--------|
|                                                                          | OR (95% CI)            | P      | OR (95% CI)         | P      | OR (95% CI)         | P      | OR (95% CI)         | P      | OR (95% CI)         | P      | OR (95% CI)         | P      |
| <b>Male</b>                                                              |                        |        |                     |        |                     |        |                     |        |                     |        |                     |        |
| Any chronic conditions                                                   | 1.39<br>(1.27-1.53)    | <.0001 | 1.44<br>(1.31-1.57) | <.0001 | 1.22<br>(1.07-1.41) | 0.0044 | 1.14<br>(0.85-1.53) | 0.3852 | 1.14<br>(0.84-1.56) | 0.4038 | 1.10<br>(0.87-1.39) | 0.4386 |
| Hypertension                                                             | 1.38<br>(1.26-1.26)    | <.0001 | 1.46<br>(1.33-1.60) | <.0001 | 1.21<br>(1.05-1.39) | 0.0070 | 1.04<br>(0.78-1.38) | 0.8069 | 0.88<br>(0.64-1.19) | 0.4061 | 1.03<br>(0.81-1.30) | 0.8218 |
| Diabetes                                                                 | 1.47<br>(1.28-1.67)    | <.0001 | 1.31<br>(1.15-1.50) | <.0001 | 1.74<br>(1.43-2.10) | <.0001 | 1.18<br>(0.78-1.77) | 0.4359 | 1.33<br>(0.88-2.03) | 0.1776 | 1.51<br>(1.09-2.09) | 0.0123 |
| IHD                                                                      | 1.12<br>(0.87-1.43)    | 0.3866 | 1.12<br>(0.87-1.45) | 0.3700 | 0.93<br>(0.63-1.39) | 0.7375 | 5.49<br>(3.60-8.36) | <.0001 | 1.45<br>(0.74-2.86) | 0.2764 | 0.70<br>(0.32-1.55) | 0.3791 |
| CVD                                                                      | 0.93<br>(0.70-1.24)    | 0.6254 | 0.80<br>(0.59-1.08) | 0.1487 | 0.94<br>(0.61-1.46) | 0.7936 | 1.64<br>(0.84-3.22) | 0.1484 | 3.48<br>(2.03-5.99) | <.0001 | 0.73<br>(0.30-1.73) | 0.4709 |
| Obesity                                                                  | 1.47<br>(1.18-1.82)    | 0.0005 | 1.31<br>(1.06-1.61) | 0.0115 | 1.27<br>(0.93-1.74) | 0.1271 | 1.04<br>(0.52-2.07) | 0.9131 | 0.87<br>(0.40-1.93) | 0.7368 | 5.09<br>(3.67-7.07) | <.0001 |
| <b>Female</b>                                                            |                        |        |                     |        |                     |        |                     |        |                     |        |                     |        |
| Any chronic conditions                                                   | 1.49<br>(1.36-1.63)    | <.0001 | 1.49<br>(1.36-1.63) | <.0001 | 1.39<br>(1.21-1.60) | <.0001 | 1.31<br>(1.01-1.71) | 0.0453 | 0.91<br>(0.68-1.22) | 0.5335 | 1.36<br>(1.08-1.71) | 0.0101 |
| Hypertension                                                             | 1.49<br>(1.36-1.62)    | <.0001 | 1.59<br>(1.45-1.74) | <.0001 | 1.26<br>(1.10-1.45) | 0.0011 | 1.32<br>(1.02-1.71) | 0.0365 | 0.86<br>(0.64-1.15) | 0.3052 | 1.15<br>(0.92-1.45) | 0.2201 |

| Exposure:<br>chronic condition status of any<br>other household members. | Any chronic conditions |        | Hypertension        |        | Diabetes            |        | IHD                  |        | CVD                 |        | Obesity             |        |
|--------------------------------------------------------------------------|------------------------|--------|---------------------|--------|---------------------|--------|----------------------|--------|---------------------|--------|---------------------|--------|
|                                                                          | OR (95% CI)            | P      | OR (95% CI)         | P      | OR (95% CI)         | P      | OR (95% CI)          | P      | OR (95% CI)         | P      | OR (95% CI)         | P      |
| Diabetes                                                                 | 1.28<br>(1.12-1.46)    | 0.0002 | 1.28<br>(1.12-1.46) | 0.0003 | 1.76<br>(1.45-2.13) | <.0001 | 0.95<br>(0.65-1.40)  | 0.8038 | 0.95<br>(0.60-1.49) | 0.8158 | 1.32<br>(0.96-1.81) | 0.0902 |
| IHD                                                                      | 1.06<br>(0.82-1.36)    | 0.6716 | 1.01<br>(0.78-1.31) | 0.9455 | 1.09<br>(0.75-1.59) | 0.6389 | 5.72<br>(3.81-8.58)  | <.0001 | 1.47<br>(0.75-2.87) | 0.2645 | 1.03<br>(0.52-2.01) | 0.9400 |
| CVD                                                                      | 0.97<br>(0.74-1.26)    | 0.8189 | 0.83<br>(0.63-1.09) | 0.1782 | 1.16<br>(0.77-1.75) | 0.4648 | 1.43<br>(0.72-2.82)  | 0.3023 | 3.64<br>(2.19-6.08) | <.0001 | 0.52<br>(0.19-1.39) | 0.1907 |
| Obesity                                                                  | 1.13<br>(0.90-1.42)    | 0.2994 | 1.00<br>(0.79-1.27) | 0.9974 | 1.52<br>(1.11-2.09) | 0.0100 | 0.65<br>(0.28-1.50)  | 0.3101 | 0.27<br>(0.06-1.11) | 0.0699 | 3.61<br>(2.48-5.26) | <.0001 |
| <b>Illiteracy/Primary</b>                                                |                        |        |                     |        |                     |        |                      |        |                     |        |                     |        |
| Any chronic conditions                                                   | 2.29<br>(2.00-2.63)    | <.0001 | 1.50<br>(1.31-1.71) | <.0001 | 1.16<br>(0.97-1.38) | 0.1064 | 0.95<br>(0.68-1.34)  | 0.7815 | 0.95<br>(0.70-1.29) | 0.7388 | 1.19<br>(0.85-1.67) | 0.3038 |
| Hypertension                                                             | 1.77<br>(1.55-2.01)    | <.0001 | 2.55<br>(2.22-2.92) | <.0001 | 1.12<br>(0.94-1.33) | 0.2053 | 0.97<br>(0.70-1.35)  | 0.8688 | 0.99<br>(0.74-1.34) | 0.9727 | 1.00<br>(0.72-1.38) | 0.9855 |
| Diabetes                                                                 | 1.20<br>(1.00-1.43)    | 0.0445 | 1.22<br>(1.03-1.44) | 0.0229 | 1.79<br>(1.35-2.38) | <.0001 | 0.70<br>(0.40-1.24)  | 0.2242 | 0.77<br>(0.48-1.26) | 0.3011 | 1.18<br>(0.72-1.93) | 0.5080 |
| IHD                                                                      | 1.05<br>(0.74-1.48)    | 0.7975 | 0.97<br>(0.70-1.36) | 0.8720 | 0.86<br>(0.48-1.54) | 0.6177 | 6.74<br>(3.64-12.46) | <.0001 | 2.03<br>(1.05-3.92) | 0.0360 | 1.26<br>(0.48-3.36) | 0.6389 |
| CVD                                                                      | 0.94<br>(0.68-1.29)    | 0.6994 | 0.85<br>(0.62-1.17) | 0.3135 | 0.83<br>(0.50-1.39) | 0.4814 | 1.86<br>(0.91-3.80)  | 0.0883 | 2.73<br>(1.32-5.64) | 0.0066 | 1.17<br>(0.49-2.81) | 0.7180 |

| Exposure:<br>chronic condition status of any<br>other household members. | Any chronic conditions |        | Hypertension        |        | Diabetes            |        | IHD                 |        | CVD                 |        | Obesity             |        |
|--------------------------------------------------------------------------|------------------------|--------|---------------------|--------|---------------------|--------|---------------------|--------|---------------------|--------|---------------------|--------|
|                                                                          | OR (95% CI)            | P      | OR (95% CI)         | P      | OR (95% CI)         | P      | OR (95% CI)         | P      | OR (95% CI)         | P      | OR (95% CI)         | P      |
| Obesity                                                                  | 1.20<br>(0.91-1.58)    | 0.2047 | 1.07<br>(0.81-1.40) | 0.6397 | 1.46<br>(1.01-2.13) | 0.0450 | 1.02<br>(0.45-2.32) | 0.9649 | 0.62<br>(0.25-1.54) | 0.3065 | 3.78<br>(2.04-7.01) | <.0001 |
| <b>Secondary</b>                                                         |                        |        |                     |        |                     |        |                     |        |                     |        |                     |        |
| Any chronic conditions                                                   | 1.45<br>(1.32-1.60)    | <.0001 | 1.43<br>(1.29-1.58) | <.0001 | 1.37<br>(1.20-1.58) | <.0001 | 1.36<br>(1.02-1.83) | 0.0349 | 0.97<br>(0.69-1.37) | 0.8698 | 0.98<br>(0.78-1.24) | 0.8892 |
| Hypertension                                                             | 1.34<br>(1.22-1.48)    | <.0001 | 1.91<br>(1.72-2.11) | <.0001 | 1.32<br>(1.16-1.51) | <.0001 | 1.37<br>(1.03-1.81) | 0.0287 | 0.76<br>(0.53-1.08) | 0.1227 | 1.00<br>(0.80-1.25) | 0.9899 |
| Diabetes                                                                 | 1.19<br>(1.04-1.36)    | 0.0090 | 1.29<br>(1.13-1.46) | 0.0001 | 1.67<br>(1.34-2.08) | <.0001 | 1.28<br>(0.87-1.90) | 0.2140 | 1.61<br>(1.02-2.53) | 0.0395 | 1.40<br>(1.03-1.90) | 0.0331 |
| IHD                                                                      | 1.05<br>(0.82-1.33)    | 0.7096 | 1.11<br>(0.86-1.42) | 0.4324 | 0.95<br>(0.65-1.39) | 0.7949 | 6.06<br>(3.68-9.97) | <.0001 | 0.81<br>(0.32-2.06) | 0.6626 | 0.51<br>(0.21-1.20) | 0.1231 |
| CVD                                                                      | 0.93<br>(0.70-1.22)    | 0.5950 | 0.83<br>(0.62-1.12) | 0.2354 | 1.33<br>(0.90-1.96) | 0.1528 | 0.81<br>(0.32-2.04) | 0.6586 | 3.90<br>(1.99-7.63) | <.0001 | 0.24<br>(0.06-0.98) | 0.0467 |
| Obesity                                                                  | 1.32<br>(1.06-1.64)    | 0.0132 | 1.14<br>(0.92-1.41) | 0.2223 | 1.28<br>(0.95-1.71) | 0.1041 | 0.73<br>(0.34-1.57) | 0.4245 | 0.67<br>(0.24-1.86) | 0.4398 | 3.05<br>(1.94-4.79) | <.0001 |
| <b>Collage</b>                                                           |                        |        |                     |        |                     |        |                     |        |                     |        |                     |        |
| Any chronic conditions                                                   | 1.69<br>(1.39-2.05)    | <.0001 | 1.55<br>(1.25-1.91) | <.0001 | 1.14<br>(0.83-1.58) | 0.4111 | 1.05<br>(0.63-1.75) | 0.8497 | 1.12<br>(0.56-2.23) | 0.7439 | 1.82<br>(1.25-2.67) | 0.0003 |

| Exposure:<br>chronic condition status of any<br>other household members. | Any chronic conditions |        | Hypertension        |        | Diabetes            |        | IHD                 |        | CVD                   |        | Obesity             |         |
|--------------------------------------------------------------------------|------------------------|--------|---------------------|--------|---------------------|--------|---------------------|--------|-----------------------|--------|---------------------|---------|
|                                                                          | OR (95% CI)            | P      | OR (95% CI)         | P      | OR (95% CI)         | P      | OR (95% CI)         | P      | OR (95% CI)           | P      | OR (95% CI)         | P       |
| Hypertension                                                             | 1.43<br>(1.19-1.73)    | 0.0002 | 1.64<br>(1.32-2.04) | <.0001 | 1.17<br>(0.85-1.61) | 0.3432 | 0.93<br>(0.56-1.53) | 0.7628 | 0.67<br>(0.33-1.36)   | 0.2673 | 1.62<br>(1.12-2.33) | 0.0103  |
| Diabetes                                                                 | 1.70<br>(1.33-2.16)    | <.0001 | 1.60<br>(1.22-2.09) | 0.0007 | 1.48<br>(0.91-2.42) | 0.1169 | 1.23<br>(0.63-2.41) | 0.5452 | 1.22<br>(0.51-2.93)   | 0.6546 | 1.69<br>(1.08-2.65) | 0.0220  |
| IHD                                                                      | 1.14<br>(0.75-1.73)    | 0.5444 | 1.02<br>(0.64-1.63) | 0.9371 | 1.28<br>(0.69-2.39) | 0.4309 | 2.41<br>(0.98-5.96) | 0.0557 | 1.68<br>(0.58-4.87)   | 0.3376 | 1.58<br>(0.67-3.70) | 0.2928  |
| CVD                                                                      | 1.20<br>(0.69-2.09)    | 0.5079 | 0.72<br>(0.37-1.39) | 0.3256 | 0.57<br>(0.20-1.62) | 0.2923 | 2.32<br>(0.85-6.28) | 0.0988 | 10.19<br>(3.52-29.46) | <.0001 | 0.88<br>(0.21-3.64) | 0.8569  |
| Obesity                                                                  | 2.34<br>(1.52-3.60)    | 0.0001 | 1.51<br>(0.94-2.42) | 0.0848 | 1.70<br>(0.78-3.71) | 0.1829 | 0.83<br>(0.18-3.93) | 0.8179 | -                     | -      | 4.93<br>(2.72-8.93) | <0.0001 |

## Note:

The chronic conditions on the top of table represented the status of participants. The chronic conditions on the left of the table represented the status of any other household members. The generalized estimating equations (GEE) model was adjusted for age, gender, health insurance status, education status, marriage status, drinking and smoking. The adjusted GEE model was not fit for estimate the association between CVD and obesity in the “Collage” subgroup.

Table S3 The crude associations of chronic conditions between children and their own parents - Scene 2 (N = 5,489 dyads)

| Exposure:<br>chronic condition status of parents | Any chronic conditions |        | Hypertension    |        | Diabetes          |        | Obesity           |        |
|--------------------------------------------------|------------------------|--------|-----------------|--------|-------------------|--------|-------------------|--------|
|                                                  | OR (95% CI)            | P      | OR (95% CI)     | P      | OR (95% CI)       | P      | OR (95% CI)       | P      |
| Any chronic conditions                           | 5.85(4.83-7.09)        | <.0001 | 6.60(5.25-8.28) | <.0001 | 6.36(3.98-10.18)  | <.0001 | 2.91(2.01-4.20)   | <.0001 |
| Hypertension                                     | 4.52(3.77-5.41)        | <.0001 | 7.14(5.73-8.90) | <.0001 | 3.32(2.24-4.90)   | <.0001 | 1.61(1.13-2.29)   | 0.0085 |
| Diabetes                                         | 2.26(1.78-2.87)        | <.0001 | 1.75(1.27-2.41) | 0.0007 | 11.28(7.65-16.62) | <.0001 | 1.57(0.93-2.67)   | 0.0941 |
| Obesity                                          | 3.09(2.07-4.60)        | <.0001 | 0.82(0.39-1.73) | 0.6037 | 1.98(0.79-4.94)   | 0.1449 | 14.88(9.35-23.68) | <.0001 |

Note:

The chronic conditions on the top of table represented the status of children. The chronic conditions on the left of the table represented the status of their parents. The analyses of IHD and CVD were not conducted because of low prevalence rate in this subset.

Table S4 The crude associations of chronic conditions between wife and their own husband - Scene 3 (N = 7,844 spouses)

| Exposure:<br>chronic condition status of any<br>other household members. | Any chronic conditions |        | Hypertension        |        | Diabetes            |        | IHD                    |        | CVD                   |        | Obesity             |        |
|--------------------------------------------------------------------------|------------------------|--------|---------------------|--------|---------------------|--------|------------------------|--------|-----------------------|--------|---------------------|--------|
|                                                                          | OR (95% CI)            | P      | OR (95% CI)         | P      | OR (95% CI)         | P      | OR (95% CI)            | P      | OR (95% CI)           | P      | OR (95% CI)         | P      |
| Any chronic conditions                                                   | 2.88<br>(2.61-3.18)    | <.0001 | 2.80<br>(2.53-3.10) | <.0001 | 2.35<br>(1.96-2.82) | <.0001 | 3.41<br>(2.32-5.02)    | <.0001 | 1.82<br>(1.24-2.67)   | 0.0022 | 1.65<br>(1.20-2.26) | 0.0020 |
| Hypertension                                                             | 2.91<br>(2.63-3.22)    | <.0001 | 2.94<br>(2.65-3.26) | <.0001 | 2.31<br>(1.93-2.78) | <.0001 | 3.30<br>(2.27-4.80)    | <.0001 | 1.62<br>(1.10-2.38)   | 0.0147 | 1.39<br>(1.01-1.93) | 0.0453 |
| Diabetes                                                                 | 2.09<br>(1.78-2.46)    | <.0001 | 1.97<br>(1.67-2.33) | <.0001 | 2.12<br>(1.64-2.75) | <.0001 | 2.51<br>(1.55-4.05)    | 0.0002 | 0.92<br>(0.44-1.89)   | 0.8143 | 1.20<br>(0.70-2.06) | 0.5082 |
| IHD                                                                      | 2.84<br>(2.01-4.01)    | <.0001 | 2.54<br>(1.80-3.59) | <.0001 | 2.38<br>(1.44-3.95) | 0.0008 | 18.21<br>(11.18-29.63) | <.0001 | 5.01<br>(2.39-10.53)  | <.0001 | 1.55<br>(0.57-4.26) | 0.3911 |
| CVD                                                                      | 2.91<br>(2.01-4.19)    | <.0001 | 2.18<br>(1.51-3.15) | <.0001 | 2.02<br>(1.15-3.55) | 0.0150 | 3.68<br>(1.58-8.53)    | 0.0025 | 10.16<br>(5.51-18.73) | <.0001 | 1.75<br>(0.64-4.80) | 0.2782 |
| Obesity                                                                  | 1.02<br>(0.74-1.39)    | 0.9177 | 0.73<br>(0.51-1.04) | 0.0822 | 1.42<br>(0.84-2.38) | 0.1863 | 0.72<br>(0.18-2.94)    | 0.6484 | 0.39<br>(0.05-2.83)   | 0.3542 | 4.72<br>(2.7108.22) | <.0001 |

Note:

The chronic conditions on the top of table represented the status of wives. The chronic conditions on the left of the table represented the status of their husband.

Table S5 The results of full models for the association between chronic conditions of individual with the same condition of household member

| Factors                       | Subsample1      |         | Subsample2        |         | Subsample3      |         |
|-------------------------------|-----------------|---------|-------------------|---------|-----------------|---------|
|                               | OR(95%CI)       | P       | OR(95%CI)         | P       | OR(95%CI)       | P       |
| <b>Any chronic conditions</b> |                 |         |                   |         |                 |         |
| Same condition                | 3.03(2.81-3.28) | <0.0001 | 5.13(4.20-6.28)   | <0.0001 | 1.58(1.41-1.77) | <0.0001 |
| Age                           | 1.07(1.07-1.07) | <0.0001 | 1.08(1.08-1.09)   | <0.0001 | 1.08(1.07-1.08) | <0.0001 |
| Sex                           |                 |         |                   |         |                 |         |
| Female                        | Ref             |         | Ref               |         | -               | -       |
| Male                          | 1.16(1.07-1.26) | 0.0002  | 1.48(1.17-1.88)   | 0.0010  | -               | -       |
| Health insurance status       |                 |         |                   |         |                 |         |
| Insuranced                    | Ref             |         | Ref               |         | Ref             |         |
| No insuranced                 | 0.82(0.74-0.91) | 0.0001  | 1.02(0.62-1.68)   | 0.9319  | 1.08(0.78-1.49) | 0.6577  |
| Education status              |                 |         |                   |         |                 |         |
| Illieracy/Primary             | Ref             |         |                   |         |                 |         |
| Seconary                      | 1.22(1.11-1.34) | <0.0001 | 1.54(1.07-2.21)   | 0.0204  | 1.91(1.54-2.37) | <0.0001 |
| Collage                       | 1.34(1.23-1.45) | <0.0001 | 1.44(1.13-1.83)   | 0.0028  | 1.74(1.43-2.12) | <0.0001 |
| Smoking                       | 1.00(0.91-1.09) | 0.9306  | 1.19(0.92-1.53)   | 0.1781  | 1.01(0.70-1.48) | 0.9386  |
| Drinking                      | 0.85(0.78-0.93) | 0.0002  | 0.89(0.70-1.13)   | 0.3515  | 1.20(0.85-1.70) | 0.3001  |
| <b>Hypertension</b>           |                 |         |                   |         |                 |         |
| Same condition                | 3.26(3.02-3.52) | <0.0001 | 6.29(4.92-8.05)   | <0.0001 | 1.63(1.45-1.84) | <0.0001 |
| Age                           | 1.07(1.07-1.07) | <0.0001 | 1.12(1.11-1.13)   | <0.0001 | 1.08(1.07-1.08) | <0.0001 |
| Sex                           |                 |         |                   |         |                 |         |
| Female                        | Ref             |         | Ref               |         | -               | -       |
| Male                          | 1.10(1.01-1.20) | 0.0247  | 1.26(0.94-1.70)   | 0.1247  | -               | -       |
| Health insurance status       |                 |         |                   |         |                 |         |
| Insuranced                    | Ref             |         | Ref               |         | Ref             |         |
| No insuranced                 | 0.98(0.87-1.11) | 0.7680  | 0.73(0.39-1.37)   | 0.3310  | 0.98(0.70-1.37) | 0.9004  |
| Education status              |                 |         |                   |         |                 |         |
| Illieracy/Primary             | Ref             |         | Ref               |         | Ref             |         |
| Seconary                      | 1.32(1.20-1.45) | <0.0001 | 1.56(1.01-2.41)   | 0.0435  | 1.92(1.53-2.40) | <0.0001 |
| Collage                       | 1.39(1.28-1.51) | <0.0001 | 1.50(1.10-2.03)   | 0.0093  | 1.76(1.42-2.17) | <0.0001 |
| Smoking                       | 1.03(0.94-1.13) | 0.5309  | 1.13(0.84-1.53)   | 0.4109  | 1.11(0.75-1.65) | 0.6052  |
| Drinking                      | 0.77(0.70-0.84) | <0.0001 | 0.71(0.54-0.94)   | 0.0166  | 1.22(0.85-1.75) | 0.2834  |
| <b>Diabetes</b>               |                 |         |                   |         |                 |         |
| Same condition                | 1.68(1.40-2.01) | <0.0001 | 11.56(7.88-16.98) | <0.0001 | 1.57(1.21-2.03) | 0.0007  |
| Age                           | 1.05(1.04-1.06) | <0.0001 | 1.08(1.06-1.10)   | <0.0001 | 1.05(1.05-1.06) | <0.0001 |
| Sex                           |                 |         |                   |         |                 |         |
| Female                        | Ref             |         | Ref               |         | -               | -       |
| Male                          | 1.05(0.91-1.20) | 0.5013  | 1.45(0.88-2.37)   | 0.1409  | -               | -       |
| Health insurance status       |                 |         |                   |         |                 |         |
| Insuranced                    | Ref             |         | Ref               |         |                 |         |



|                         |                 |         |                   |         |                  |         |
|-------------------------|-----------------|---------|-------------------|---------|------------------|---------|
| No insured              | 0.29(0.06-1.48) | 0.1362  | 0.94(0.30-2.93)   | 0.9158  | 0.86(0.46-1.59)  | 0.6258  |
| Education status        |                 |         |                   |         |                  |         |
| Illiteracy/Primary      | Ref             |         | Ref               |         | Ref              |         |
| Secondary               | 1.00(0.79-1.27) | 0.9867  | 2.34(1.04-5.27)   | 0.0410  | 2.23(1.41-3.53)  | 0.0006  |
| Collage                 | 1.35(1.17-1.55) | <0.0001 | 2.66(1.45-4.87)   | 0.0016  | 2.15(1.40-3.31)  | 0.0005  |
| Smoking                 | 0.84(0.73-0.96) | 0.0130  | 1.17(0.73-1.89)   | 0.5071  | 0.72(0.41-1.29)  | 0.2728  |
| Drinking                | 1.12(0.98-1.29) | 0.0943  | 1.11(0.69-1.79)   | 0.6780  | 1.32(0.69-2.53)  | 0.4069  |
| IHD                     |                 |         |                   |         |                  |         |
| Same condition          | 5.31(3.56-7.92) | <0.0001 | -                 | -       | 6.58(3.78-11.43) | <0.0001 |
| Age                     | 1.06(1.05-1.07) | <0.0001 | -                 | -       | 1.11(1.09-1.12)  | <0.0001 |
| Sex                     |                 |         |                   |         |                  |         |
| Female                  | Ref             |         | Ref               |         | -                | -       |
| Male                    | 0.85(0.64-1.12) | 0.2523  | -                 | -       | -                | -       |
| Health insurance status |                 |         |                   |         |                  |         |
| Insured                 | Ref             |         | Ref               |         | Ref              |         |
| No insured              | 0.52(0.16-1.69) | 0.2753  | -                 | -       | 1.39(0.41-4.73)  | 0.5993  |
| Education status        |                 |         |                   |         |                  |         |
| Illiteracy/Primary      | Ref             |         |                   |         |                  |         |
| Secondary               | 0.60(0.43-0.84) | 0.0025  | -                 | -       | 0.39(0.20-0.78)  | 0.0072  |
| Collage                 | 0.87(0.70-1.10) | 0.2495  | -                 | -       | 0.88(0.47-1.65)  | 0.6853  |
| Smoking                 | 1.10(0.83-1.46) | 0.5087  | -                 | -       | 2.16(0.28-16.40) | 0.4584  |
| Drinking                | 1.09(0.81-1.46) | 0.5672  | -                 | -       | 0.42(0.18-0.98)  | 0.0458  |
| CVD                     |                 |         |                   |         |                  |         |
| Same condition          | 3.40(1.99-5.80) | <0.0001 | -                 | -       | 3.62(1.86-7.07)  | 0.0002  |
| Age                     | 1.08(1.07-1.09) | <0.0001 | -                 | -       | 1.10(1.08-1.12)  | <0.0001 |
| Sex                     |                 |         |                   |         |                  |         |
| Female                  | Ref             |         | Ref               |         | -                | -       |
| Male                    | 1.20(0.94-1.54) | 0.1491  | -                 | -       | -                | -       |
| Health insurance status |                 |         |                   |         |                  |         |
| Insured                 | Ref             |         | Ref               |         | Ref              |         |
| No insured              | 0.73(0.38-1.40) | 0.3380  | -                 | -       | 1.23(0.35-4.31)  | 0.7483  |
| Education status        |                 |         |                   |         |                  |         |
| Illiteracy/Primary      | Ref             |         | Ref               |         | Ref              |         |
| Secondary               | 1.59(1.13-2.24) | 0.0072  | -                 | -       | 1.25(0.55-2.81)  | 0.5940  |
| Collage                 | 1.24(0.90-1.72) | 0.1899  | -                 | -       | 1.15(0.51-2.60)  | 0.7410  |
| Smoking                 | 1.34(0.97-1.84) | 0.0781  | -                 | -       | 1.61(0.21-12.13) | 0.6429  |
| Drinking                | 1.32(0.96-1.80) | 0.0867  | -                 | -       | 2.57(0.34-19.52) | 0.3603  |
| Obesity                 |                 |         |                   |         |                  |         |
| Same condition          | 3.41(2.34-4.96) | <0.0001 | 13.85(8.54-22.46) | <0.0001 | 5.09(2.92-8.86)  | <0.0001 |
| Age                     | 1.01(1.00-1.02) | 0.0462  | 1.00(0.98-1.02)   | 0.8932  | 1.02(1.01-1.04)  | 0.0015  |
| Sex                     |                 |         |                   |         |                  |         |
| Female                  | Ref             |         | Ref               |         | -                | -       |
| Male                    | 1.08(0.88-1.33) | 0.4682  | 2.04(1.31-3.17)   | 0.0017  | -                | -       |

|                         |                 |        |                 |        |                 |        |
|-------------------------|-----------------|--------|-----------------|--------|-----------------|--------|
| Health insurance status |                 |        |                 |        |                 |        |
| Insuranced              | Ref             |        | Ref             |        | Ref             |        |
| No insuranced           | 0.37(0.06-2.09) | 0.2588 | 1.18(0.55-2.53) | 0.6670 | 1.56(0.72-3.41) | 0.2630 |
| Education status        |                 |        |                 |        |                 |        |
| Illieracy/Primary       | Ref             |        | Ref             |        | Ref             |        |
| Seconary                | 0.87(0.56-1.35) | 0.5298 | 1.08(0.44-2.64) | 0.8624 | 2.06(0.98-4.32) | 0.0558 |
| Collage                 | 1.04(0.81-1.34) | 0.7469 | 1.27(0.82-1.98) | 0.2858 | 2.11(1.06-4.20) | 0.0339 |
| Smoking                 | 1.11(0.89-1.39) | 0.3468 | 1.14(0.69-1.89) | 0.6041 | 1.22(0.38-3.86) | 0.7376 |
| Drinking                | 1.02(0.82-1.26) | 0.8914 | 1.47(0.83-2.58) | 0.1846 | 0.89(0.37-2.17) | 0.8004 |
